# Supplementary material for: Systems analysis reveals down-regulation of a network of pro-survival miRNAs drives the apoptotic response in dilated cardiomyopathy
Source: Royal Society of Chemistry journal article supplement (doi:10.1039/c4mb00265b), 2014-10-20
Supplement: c4mb00265b2.xlsx [file c4mb00265b2.xlsx]

## Sheet: R9C_miR_ExiqonAgilent08w_Stats.
Exiqon.ID	Agilent.ID	Exiqon.diff	Agilent.diff	Exiqon.tTest_pval	Agilent.tTest_pval	Sum_of_Ranks	Short.label
mmu-miR-499	hsa-miR-499	-0.765833	-1.0613	0.0297299	0.106249	278	499
mmu-miR-30e*	hsa-miR-30e-5p	-0.591667	-0.707587	0.0297299	0.231878	271	30e-5p
mmu-miR-486	hsa-miR-486	-0.613333	-0.45866	0.042398	0.0443895	265	486
mmu-miR-30c	hsa-miR-30c	-0.5075	-0.496946	0.0297299	0.649371	264	30c
mmu-miR-149	hsa-miR-149	-0.486667	-0.643931	0.06626	0.130818	264	149
mmu-miR-451	hsa-miR-451	-0.516667	-0.436495	0.152738	0.106718	262	451
mmu-miR-30a*	hsa-miR-30a-5p	-0.4125	-0.713324	0.0297299	0.106718	261	30a-5p
mmu-miR-30d	hsa-miR-30d	-0.306667	-0.733176	0.0748848	0.0188741	252	30d
mmu-miR-185	hsa-miR-185	-0.359167	-0.576266	0.06626	0.0393987	251	185
mmu-miR-378	hsa-miR-378	-0.298333	-0.702891	0.0672548	0.128007	247	378
mmu-miR-328	hsa-miR-328	-0.296667	-0.672235	0.144588	0.600596	244	328
mmu-miR-150	hsa-miR-150	-0.498333	-0.246232	0.0147896	0.897875	242	150
mmu-miR-30e	hsa-miR-30e-3p	-0.3625	-0.32616	0.124437	0.743141	240	30e-3p
mmu-miR-29c	hsa-miR-29c	-0.185	-1.00781	0.267561	0.135824	237	29c
mmu-miR-30b	hsa-miR-30b	-0.430833	-0.207648	0.0392341	0.897875	235	30b
mmu-miR-186	hsa-miR-186	-0.2875	-0.436184	0.216844	0.106718	235	186
mmu-miR-128a/128b	hsa-miR-128a	-0.384167	-0.196996	0.126789	0.949802	224	128a
mmu-miR-93	hsa-miR-93	-0.2975	-0.261845	0.182991	0.646799	222	93
mmu-miR-128a/128b	hsa-miR-128b	-0.384167	-0.168322	0.126789	0.949802	220	128b
mmu-miR-30a	hsa-miR-30a-3p	-0.3075	-0.194355	0.0392341	0.88213	217	30a-3p
mmu-miR-106b	hsa-miR-106b	-0.185	-0.322185	0.0805997	0.0393987	216	106b
mmu-miR-155	hsa-miR-155	-0.484167	-0.0994757	0.041225	0.949802	215	155
mmu-miR-92a	hsa-miR-92	-0.19	-0.283254	0.186741	0.171694	213	92
mmu-miR-206	hsa-miR-206	-0.12	-0.395909	0.79237	0.672418	212	206
mmu-miR-25	hsa-miR-25	-0.458333	-0.0874184	0.0297299	0.984085	212	25
mmu-miR-1	hsa-miR-1	-0.108333	-0.386396	0.543929	0.743141	209	1
mmu-miR-20b	hsa-miR-20b	-0.1475	-0.320153	0.410767	0.567728	209	20b
mmu-miR-324-3p	hsa-miR-324-3p	-0.336667	-0.111099	0.0390095	0.646799	205	324-3p
mmu-miR-9*	hsa-miR-9*	-0.343333	-0.10413	0.0373701	0.949802	204	9*
mmu-miR-181a	hsa-miR-181a	-0.12	-0.317101	0.125009	0.0977991	204	181a
mmu-miR-181b	hsa-miR-181b	-0.155833	-0.227338	0.343275	0.761904	202	181b
mmu-miR-22	hsa-miR-22	-0.236667	-0.150143	0.126789	1	201	22
mmu-miR-17	hsa-miR-17-3p	-0.183333	-0.198343	0.403102	0.897875	200	17-3p
mmu-miR-145	hsa-miR-145	-0.224167	-0.159188	0.0480608	1	199	145
mmu-miR-194	hsa-miR-194	-0.275833	-0.116368	0.216844	0.949802	197	194
mmu-miR-370	hsa-miR-370	-0.2775	-0.109009	0.124437	0.949802	195	370
mmu-miR-133a	hsa-miR-133a	-0.426667	0	0.06626	1	193	133a
mmu-miR-133b	hsa-miR-133b	-0.413333	0	0.0422276	1	192	133b
mmu-miR-203	hsa-miR-203	-0.299167	-0.0245972	0.545406	1	185	203
mmu-miR-144	hsa-miR-144	-0.0241667	-0.304605	0.970891	0.897875	184	144
mmu-miR-208	hsa-miR-208	0.125833	-0.965768	0.877505	0.600596	180	208
mmu-miR-18a	hsa-miR-18a	0.055	-0.412106	0.891297	0.692742	179	18a
mmu-miR-129-3p	hsa-miR-129	-0.46	0.102273	0.078407	0.676223	177	129
mmu-miR-490	hsa-miR-490	-0.005	-0.203901	0.970891	0.567728	174	490
mmu-miR-20a	hsa-miR-20a	-0.0641667	-0.172547	0.620397	0.446944	174	20a
mmu-let-7g	hsa-let-7g	-0.154167	-0.0566292	0.0831921	0.988737	173	let-7g
mmu-miR-484	hsa-miR-484	0.0075	-0.204015	0.896605	0.449874	170	484
mmu-miR-143	hsa-miR-143	-0.0483333	-0.168	0.267561	0.897875	170	143
mmu-miR-101a	hsa-miR-101	0.1725	-0.480326	0.561601	0.506765	164	101
mmu-miR-130a	hsa-miR-130a	0.09	-0.310453	0.430694	0.676223	163	130a
mmu-miR-15a	hsa-miR-15a	-0.0291667	-0.125654	0.901065	0.908315	163	15a
mmu-miR-489	hsa-miR-489	-0.404167	0.166688	0.0805324	0.439241	162	489
mmu-miR-320	hsa-miR-320	0.145	-0.380658	0.343275	0.676223	160	320
mmu-let-7f	hsa-let-7f	-0.095	-0.0453424	0.216844	0.93282	158	let-7f
mmu-miR-16	hsa-miR-16	-0.165	0.015127	0.306799	1	157	16
mmu-miR-7a	hsa-miR-7	-0.1175	-0.0102915	0.472296	1	157	7
mmu-miR-126-5p	hsa-miR-126*	-0.195	0.0448038	0.380729	1	157	126*
mmu-miR-374	hsa-miR-374	-0.105833	-0.0281416	0.723064	1	156	374
mmu-miR-338-3p	hsa-miR-338	0.0616667	-0.202422	0.748718	0.897875	156	338
mmu-miR-106a	hsa-miR-106a	-0.235833	0.0815292	0.341647	1	154	106a
mmu-miR-494	hsa-miR-494	-0.0741667	-0.0476475	0.343275	0.949802	154	494
mmu-miR-801	hsa-miR-801	-0.0316667	-0.0578031	0.837778	0.984085	153	801
mmu-miR-107	hsa-miR-107	0.025	-0.137606	0.83375	0.646799	153	107
mmu-miR-365	hsa-miR-365	-0.0783333	-0.0320213	0.312001	1	151	365
mmu-miR-190	hsa-miR-190	0.22	-0.362641	0.430694	0.692742	151	190
mmu-miR-423-3p	hsa-miR-423	-0.289167	0.152485	0.0474054	0.891768	150	423
mmu-miR-501-3p	hsa-miR-501	-0.358333	0.261515	0.248204	0.897875	147	501
mmu-miR-191	hsa-miR-191	-0.106667	0.0377246	0.486875	1	145	191
mmu-miR-210	hsa-miR-210	0.116667	-0.185941	0.410767	0.837004	144	210
mmu-miR-28	hsa-miR-28	-0.0866667	0.00701912	0.385434	1	143	28
mmu-miR-98	hsa-miR-98	0.0208333	-0.0826854	0.896605	0.96345	142	98
mmu-miR-151-3p	hsa-miR-151	-0.104167	0.0387991	0.368232	0.960508	141	151
mmu-miR-17*	hsa-miR-17-5p	0.0116667	-0.0513197	0.895771	0.949802	140	17-5p
mmu-miR-184	hsa-miR-184	-0.218333	0.176285	0.42982	0.837004	139	184
mmu-let-7d	hsa-let-7d	0.0808333	-0.113743	0.504104	0.837004	138	let-7d
mmu-miR-197	hsa-miR-197	-0.0916667	0.040533	0.476794	1	138	197
mmu-miR-29a	hsa-miR-29a	0.114167	-0.13751	0.165499	0.676223	138	29a
mmu-miR-301a	hsa-miR-301	0.371667	-0.359385	0.312001	0.837004	138	301
mmu-miR-615-3p	hsa-miR-615	0.01	-0.0407845	0.917961	1	137	615
mmu-miR-487b	hsa-miR-487b	-0.140833	0.111072	0.504593	0.924854	136	487b
mmu-miR-19a	hsa-miR-19a	0.288333	-0.265577	0.0297299	0.93282	136	19a
mmu-miR-380-3p	hsa-miR-380-3p	0.00666667	-0.00187614	0.970891	1	133	380-3p
mmu-miR-148b	hsa-miR-148b	-0.06	0.0377963	0.623152	1	133	148b
mmu-miR-15b	hsa-miR-15b	-0.2275	0.275355	0.189192	0.92018	128	15b
mmu-miR-324-5p	hsa-miR-324-5p	-0.0875	0.114821	0.368232	0.949802	124	324-5p
mmu-miR-142-3p	hsa-miR-142-3p	0.538333	-0.262896	0.403991	0.936515	122	142-3p
mmu-miR-10a	hsa-miR-10a	-0.139167	0.258464	0.0375146	0.810264	119	10a
mmu-miR-212	hsa-miR-212	-0.161667	0.279753	0.340155	0.371885	118	212
mmu-let-7a	hsa-let-7a	0.185	-0.100808	0.0832442	0.897875	118	let-7a
mmu-let-7i	hsa-let-7i	0.144167	-0.0519615	0.240417	0.949802	118	let-7i
mmu-miR-126-3p	hsa-miR-126	-0.0025	0.0973942	0.970891	0.743141	116	126
mmu-miR-329	hsa-miR-329	0.0766667	0.0112607	0.433538	1	113	329
mmu-miR-381	hsa-miR-381	0.0433333	0.0654284	0.577754	0.949802	110	381
mmu-miR-326	hsa-miR-326	0.00166667	0.149011	0.970891	0.837004	109	326
mmu-miR-361	hsa-miR-361	0.00416667	0.15166	0.970891	0.88213	107	361
mmu-miR-29b	hsa-miR-29b	0.448333	-0.120924	0.313892	1	104	29b
mmu-miR-193	hsa-miR-193a	0.260833	-0.0438071	0.306799	1	102	193a
mmu-miR-500	hsa-miR-500	0.144167	0.0142292	0.447215	1	101	500
mmu-miR-425	hsa-miR-425-3p	0.0575	0.107145	0.504104	0.826979	99	425-3p
mmu-let-7b	hsa-let-7b	0.109167	0.0681319	0.417177	1	98	let-7b
mmu-miR-193b	hsa-miR-193b	0.104167	0.0724044	0.403102	1	97	193b
mmu-miR-103	hsa-miR-103	0.0175	0.197116	0.897144	0.628013	96	103
mmu-miR-23a	hsa-miR-23a	0.321667	-0.007142	0.0388044	1	90	23a
mmu-miR-19b	hsa-miR-19b	0.175833	0.0657702	0.577754	0.949802	87	19b
mmu-miR-452	hsa-miR-452	-0.0658333	0.650354	0.571961	0.327038	87	452
mmu-miR-100	hsa-miR-100	0.0433333	0.233181	0.504593	0.837004	87	100
mmu-miR-26a	hsa-miR-26a	0.045	0.222701	0.654553	0.564817	86	26a
mmu-miR-668	hsa-miR-668	0.075	0.213278	0.66657	0.897875	83	668
mmu-miR-32	hsa-miR-32	0.39	0.000652362	0.50697	1	81	32
mmu-miR-140	hsa-miR-140	0.275	0.0569035	0.264207	0.949802	80	140
mmu-miR-652	hsa-miR-652	0.165	0.137434	0.312001	0.924854	79	652
mmu-miR-193	hsa-miR-193b	0.260833	0.0724044	0.306799	1	77	193b
mmu-miR-99a	hsa-miR-99a	0.0416667	0.330303	0.569741	0.130818	76	99a
mmu-let-7c	hsa-let-7c	0.118333	0.301057	0.367853	0.53868	63	let-7c
mmu-miR-204	hsa-miR-204	0.14	0.298401	0.43662	0.676223	62	204
mmu-miR-99b	hsa-miR-99b	0.2075	0.270043	0.0297299	0.322008	58	99b
mmu-miR-152	hsa-miR-152	0.165	0.326088	0.189192	0.399902	55	152
mmu-let-7e	hsa-let-7e	0.235833	0.271588	0.250806	0.478583	55	let-7e
mmu-miR-24	hsa-miR-24	0.335	0.204982	0.0147896	0.638184	53	24
mmu-miR-27b	hsa-miR-27b	0.354167	0.203945	0.0323085	0.0977991	53	27b
mmu-miR-148a	hsa-miR-148a	0.294167	0.272503	0.046341	0.837004	48	148a
mmu-miR-195	hsa-miR-195	0.1975	0.572941	0.308692	0.0977991	45	195
mmu-miR-342-3p	hsa-miR-342	0.2725	0.448069	0.0388044	0.401179	43	342
mmu-miR-199a-3p/199b	hsa-miR-199b	0.950833	0.16344	0.046341	0.592865	43	199b
mmu-miR-23b	hsa-miR-23b	0.315833	0.467548	0.0569536	0.0443895	38	23b
mmu-miR-455	hsa-miR-455	1.1925	0.19103	0.046341	0.0977991	37	455
mmu-miR-27a	hsa-miR-27a	0.406667	0.283645	0.0297299	0.449874	36	27a
mmu-miR-221	hsa-miR-221	0.405833	0.505731	0.057722	0.0393987	29	221
mmu-miR-10b	hsa-miR-10b	0.38	0.579485	0.309982	0.0952033	29	10b
mmu-miR-146a	hsa-miR-146a	0.655	0.480001	0.00961053	0.106718	24	146a
mmu-miR-142-5p	hsa-miR-142-5p	0.463333	0.698018	0.367853	0.0952033	22	142-5p
mmu-miR-222	hsa-miR-222	0.6425	0.829387	0.0297299	0.0230278	18	222
mmu-miR-223	hsa-miR-223	0.725833	1.07208	0.00695821	0.0952033	13	223
mmu-miR-199a-3p/199b	hsa-miR-199a	0.950833	0.788639	0.046341	0.188689	13	199a
mmu-miR-146b	hsa-miR-146b	0.818333	1.0819	0.00961053	0.0188741	11	146b
mmu-miR-199a-5p	hsa-miR-199a*	1.0025	0.940991	0.0337047	0.0674429	10	199a*
mmu-miR-34a	hsa-miR-34a	0.835	1.1396	0.0297299	0.0393987	9	34a
mmu-miR-214	hsa-miR-214	1.12417	1.04782	0.0363733	0.0834032	8	214
mmu-miR-21	hsa-miR-21	1.95417	2.36114	0.00961053	0.00574813	2	21
			UP
			DOWN
