# Supplementary material for: Systems analysis reveals down-regulation of a network of pro-survival miRNAs drives the apoptotic response in dilated cardiomyopathy
Source: Royal Society of Chemistry journal article supplement (doi:10.1039/c4mb00265b), 2014-10-20
Supplement: c4mb00265b3.xlsx [file c4mb00265b3.xlsx]

## Sheet: SupplementaryTable1_apoptosisTe
geneset_name
ACHPATHWAY
activated T cell apoptosis
ACTIVATION AND OLIGOMERIZATION OF BAK PROTEIN
ACTIVATION OF BAD AND TRANSLOCATION TO MITOCHONDRIA
ACTIVATION OF BH3-ONLY PROTEINS
ACTIVATION OF BIM AND TRANSLOCATION TO MITOCHONDRIA
ACTIVATION OF BMF AND TRANSLOCATION TO MITOCHONDRIA
activation of caspase activity
Activation of caspases through apoptosome-mediated cleavage
ACTIVATION OF DNA FRAGMENTATION FACTOR
activation of pro-apoptotic gene products
ACTIVATION OF PRO-CASPASE 8
ACTIVATION OF PUMA AND TRANSLOCATION TO MITOCHONDRIA
ACTIVATION, MYRISTOLYATION OF BID AND TRANSLOCATION TO MITOCHONDRIA
ACTIVATION, TRANSLOCATION AND OLIGOMERIZATION OF BAX
anti-apoptosis
APOPTOSIS
APOPTOSIS INDUCED DNA FRAGMENTATION
apoptosis involved in mammary gland involution
APOPTOSIS_GENMAPP
APOPTOSIS_KEGG
apoptosome
apoptotic cell clearance
APOPTOTIC CLEAVAGE OF CELL ADHESION PROTEINS
APOPTOTIC CLEAVAGE OF CELLULAR PROTEINS
APOPTOTIC DNA-FRAGMENTATION AND TISSUE HOMEOSTASIS
APOPTOTIC EXECUTION PHASE
APOPTOTIC FACTOR-MEDIATED RESPONSE
apoptotic mitochondrial changes
apoptotic nuclear changes
apoptotic program
apoptotic protease activator activity
APOPTOTIC SIGNALING IN RESPONSE TO DNA DAMAGE
B cell apoptosis
BH3-ONLY PROTEINS ASSOCIATE WITH AND INACTIVATE ANTI-APOPTOTIC BCL-2 MEMBERS
BREAKDOWN OF THE NUCLEAR LAMINA
caspase activator activity
CASPASE CASCADE IN APOPTOSIS
caspase regulator activity
CASPASE-8 IS FORMED FROM PROCASPASE-8
CASPASE-MEDIATED CLEAVAGE OF CYTOSKELETAL PROTEINS
CASPASEPATHWAY
CELL DEATH SIGNALLING VIA NRAGE, NRIF AND NADE
cell structure disassembly during apoptosis
cellular response to unfolded protein
CHEMICALPATHWAY
CYTOCHROME C-MEDIATED APOPTOTIC RESPONSE
death receptor activity
DEATH RECEPTOR SIGNALLING
DEATHPATHWAY
DNA damage response, signal transduction by p53 class mediator resulting in induction of apoptosis
DNA damage response, signal transduction resulting in induction of apoptosis
DNA fragmentation during apoptosis
endoplasmic reticulum unfolded protein response
EXTRINSIC PATHWAY
EXTRINSIC PATHWAY FOR APOPTOSIS
FASL/ CD95L SIGNALING
FORMATION OF APOPTOSOME
GRANZYME A MEDIATED APOPTOSIS PATHWAY
HSA04210_APOPTOSIS
IGF1RPATHWAY
induction of apoptosis
induction of apoptosis by extracellular signals
induction of apoptosis by granzyme
induction of apoptosis by intracellular signals
induction of apoptosis by oxidative stress
INDUCTION OF APOPTOSIS THROUGH DR3 AND DR4/5 DEATH RECEPTORS
induction of apoptosis via death domain receptors
induction of programmed cell death
inflammatory cell apoptosis
INOH_REGULATION OF PRO-INFLAMMATORY GENE EXPRESSION BY AP-1
INOH_REGULATION OF TARGET GENE EXPRESSION BY AP-1
INOH_REGULATION OF TARGET GENE EXPRESSION BY NF-KB
INTRINSIC PATHWAY
INTRINSIC PATHWAY FOR APOPTOSIS
LCK AND FYN TYROSINE KINASES IN INITIATION OF TCR ACTIVATION
mast cell apoptosis
MITOCHONDRIAPATHWAY
MULTIPLE ANTIAPOPTOTIC PATHWAYS FROM IGF-1R SIGNALING LEAD TO BAD PHOSPHORYLATION
myeloid cell apoptosis
NADE MODULATES DEATH SIGNALLING
negative regulation of anti-apoptosis
negative regulation of apoptosis
negative regulation of B cell apoptosis
negative regulation of mast cell apoptosis
negative regulation of myeloid cell apoptosis
negative regulation of neuron apoptosis
negative regulation of programmed cell death
neuron apoptosis
neutrophil apoptosis
non-apoptotic programmed cell death
NRAGE SIGNALS DEATH THROUGH JNK
NRIF SIGNALS CELL DEATH FROM THE NUCLEUS
nuclear fragmentation during apoptosis
nucleus organization
OPPOSING ROLES OF AIF IN APOPTOSIS AND CELL SURVIVAL
P53-INDEPENDENT DNA DAMAGE RESPONSE
P53-INDEPENDENT G1/S DNA DAMAGE CHECKPOINT
P75 NTR RECEPTOR-MEDIATED SIGNALLING
positive regulation of anti-apoptosis
positive regulation of apoptosis
positive regulation of apoptosis involved in mammary gland involution
positive regulation of B cell apoptosis
positive regulation of caspase activity
positive regulation of catalytic activity
positive regulation of hydrolase activity
positive regulation of neuron apoptosis
positive regulation of non-apoptotic programmed cell death
positive regulation of programmed cell death
programmed cell death
protease activator activity
protein insertion into mitochondrial membrane during induction of apoptosis
PTEN DEPENDENT CELL CYCLE ARREST AND APOPTOSIS
recognition of apoptotic cell
REGULATION OF ACTIVATED PAK-2P34 BY PROTEASOME MEDIATED DEGRADATION
regulation of anti-apoptosis
regulation of apoptosis
regulation of B cell apoptosis
regulation of caspase activity
regulation of endopeptidase activity
regulation of mast cell apoptosis
regulation of myeloid cell apoptosis
regulation of neuron apoptosis
regulation of non-apoptotic programmed cell death
REGULATION OF PAK-2P34 ACTIVITY BY PS-GAP
REGULATION OF PAK-2P34 ACTIVITY BY PS-GAP/RHG10
regulation of peptidase activity
regulation of programmed cell death
RELEASE OF APOPTOTIC FACTORS FROM THE MITOCHONDRIA
release of cytochrome c from mitochondria
ROLE OF MEF2D IN T-CELL APOPTOSIS
ROLE OF MITOCHONDRIA IN APOPTOTIC SIGNALING
ROLE OF NICOTINIC ACETYLCHOLINE RECEPTORS IN THE REGULATION OF APOPTOSIS
SA_PROGRAMMED_CELL_DEATH
SCF-BETA-TRCP MEDIATED DEGRADATION OF EMI1
SETPATHWAY
SIGNALLING BY NGF
SMAC BINDS TO IAPS
SMAC-MEDIATED APOPTOTIC RESPONSE
SMAC-MEDIATED DISSOCIATION OF IAP:CASPASE COMPLEXES
STIMULATION OF THE CELL DEATH RESPONSE BY PAK-2P34
TCAPOPTOSISPATHWAY
TCRAPATHWAY
TCRMOLECULE
TNF SIGNALING
TRAIL SIGNALING
transformed cell apoptosis
TSP-1 INDUCED APOPTOSIS IN MICROVASCULAR ENDOTHELIAL CELL
UBIQUITIN MEDIATED DEGRADATION OF PHOSPHORYLATED CDC25A
UBIQUITIN-DEPENDENT DEGRADATION OF CYCLIN D
UBIQUITIN-DEPENDENT DEGRADATION OF CYCLIN D1
virus-infected cell apoptosis
