# Supplementary material for: Systems analysis reveals down-regulation of a network of pro-survival miRNAs drives the apoptotic response in dilated cardiomyopathy
Source: Royal Society of Chemistry journal article supplement (doi:10.1039/c4mb00265b), 2014-10-20
Supplement: c4mb00265b4.xlsx [file c4mb00265b4.xlsx]

## Sheet: allmirs_priorities_ts_apopgenes
mirbase id	Gene symbol	Prioritized	Integrative Score	Entrezgene	Gene name
mmu-miR-1	Hsp90b1	Yes	3	22027	heat shock protein 90, beta (Grp94), member 1
mmu-miR-10b	Gata6	Yes	2	14465	GATA binding protein 6
mmu-miR-10b	Pde4a	Yes	2	18577	phosphodiesterase 4A, cAMP specific
mmu-miR-21	Pik3r1	Yes	2	18708	phosphatidylinositol 3-kinase, regulatory subunit, polypeptide 1 (p85 alpha)
mmu-miR-29c	Fos	Yes	2	14281	FBJ osteosarcoma oncogene
mmu-miR-1	Cltc	Yes	2	67300	clathrin, heavy polypeptide (Hc)
mmu-miR-29c	Ccdc88a	Yes	2	108686	coiled coil domain containing 88A
mmu-miR-29c	Tnfrsf1a	Yes	2	21937	tumor necrosis factor receptor superfamily, member 1a
mmu-miR-29c	Camk1d	Yes	2	227541	calcium/calmodulin-dependent protein kinase ID
mmu-miR-30c	Igf1r	Yes	2	16001	insulin-like growth factor I receptor
mmu-miR-30d	Igf1r	Yes	2	16001	insulin-like growth factor I receptor
mmu-miR-29c	Btg2	Yes	2	12227	B-cell translocation gene 2, anti-proliferative
mmu-miR-30c	Pxn	Yes	2	19303	paxillin
mmu-miR-30d	Pxn	Yes	2	19303	paxillin
mmu-miR-1	Camk1d	Yes	2	227541	calcium/calmodulin-dependent protein kinase ID
mmu-miR-29c	Fem1b	Yes	2	14155	feminization 1 homolog b (C. elegans)
mmu-miR-29c	Traf3	Yes	2	22031	TNF receptor-associated factor 3
mmu-miR-149	Pea15a	Yes	2	18611	phosphoprotein enriched in astrocytes 15A
mmu-miR-486	Stk4	Yes	2	58231	serine/threonine kinase 4
mmu-miR-27a	Rps6ka5	Yes	1	73086	ribosomal protein S6 kinase, polypeptide 5
mmu-miR-21	Fasl	Yes	1	14103	Fas ligand (TNF superfamily, member 6)
mmu-miR-499	Zeb2	Yes	1	24136	zinc finger E-box binding homeobox 2
mmu-miR-221	Ddit4	Yes	1	74747	DNA-damage-inducible transcript 4
mmu-miR-222	Ddit4	Yes	1	74747	DNA-damage-inducible transcript 4
mmu-miR-27a	Eya1	Yes	1	14048	eyes absent 1 homolog (Drosophila)
mmu-miR-451	Ywhaz	Yes	1	22631	tyrosine 3-monooxygenase/tryptophan 5-monooxygenase activation protein, zeta polypeptide
mmu-miR-1	Met	Yes	1	17295	met proto-oncogene
mmu-miR-30c	Ube2d3	Yes	1	66105	ubiquitin-conjugating enzyme E2D 3 (UBC4/5 homolog, yeast)
mmu-miR-30d	Ube2d3	Yes	1	66105	ubiquitin-conjugating enzyme E2D 3 (UBC4/5 homolog, yeast)
mmu-miR-27a	Mapkapk3	Yes	1	102626	mitogen-activated protein kinase-activated protein kinase 3
mmu-miR-223	Rhob	Yes	1	11852	ras homolog gene family, member B
mmu-miR-1	Chst11	Yes	1	58250	carbohydrate sulfotransferase 11
mmu-miR-214	Sema6a	Yes	1	20358	sema domain, transmembrane domain (TM), and cytoplasmic domain, (semaphorin) 6A
mmu-miR-1	Rap1a	Yes	1	109905	RAS-related protein-1a
mmu-miR-30c	Cfl2	Yes	1	12632	cofilin 2, muscle
mmu-miR-30d	Cfl2	Yes	1	12632	cofilin 2, muscle
mmu-miR-499	Cdkn1a	Yes	1	12575	cyclin-dependent kinase inhibitor 1A (P21)
mmu-miR-1	Pla2g4a	Yes	1	18783	phospholipase A2, group IVA (cytosolic, calcium-dependent)
mmu-miR-1	Rybp	Yes	1	56353	RING1 and YY1 binding protein
mmu-miR-1	Map3k1	Yes	1	26401	mitogen-activated protein kinase kinase kinase 1
mmu-miR-1	Pdcd4	Yes	1	18569	programmed cell death 4
mmu-miR-1	Csf1	Yes	1	12977	colony stimulating factor 1 (macrophage)
mmu-miR-30c	Bnip3l	Yes	1	12177	BCL2/adenovirus E1B interacting protein 3-like
mmu-miR-30d	Bnip3l	Yes	1	12177	BCL2/adenovirus E1B interacting protein 3-like
mmu-miR-499	Apc	Yes	1	11789	adenomatosis polyposis coli
mmu-miR-30c	Serpine1	Yes	1	18787	serine (or cysteine) peptidase inhibitor, clade E, member 1
mmu-miR-30d	Serpine1	Yes	1	18787	serine (or cysteine) peptidase inhibitor, clade E, member 1
mmu-miR-29c	Akt3	Yes	1	23797	thymoma viral proto-oncogene 3
mmu-miR-199a-5p	Cav1	Yes	1	12389	caveolin 1, caveolae protein
mmu-miR-1	Api5	Yes	1	11800	apoptosis inhibitor 5
mmu-miR-29c	Csda	Yes	1	56449	cold shock domain protein A
mmu-miR-27a	5730403B10Rik	Yes	1	66626	RIKEN cDNA 5730403B10 gene
mmu-miR-27a	Kitl	Yes	1	17311	kit ligand
mmu-miR-30c	Snai2	Yes	1	20583	snail homolog 2 (Drosophila)
mmu-miR-30d	Snai2	Yes	1	20583	snail homolog 2 (Drosophila)
mmu-miR-29c	Dedd	Yes	1	21945	death effector domain-containing
mmu-miR-34a	Cycs	Yes	1	13063	cytochrome c, somatic
mmu-miR-30c	Ywhaz	Yes	1	22631	tyrosine 3-monooxygenase/tryptophan 5-monooxygenase activation protein, zeta polypeptide
mmu-miR-30d	Ywhaz	Yes	1	22631	tyrosine 3-monooxygenase/tryptophan 5-monooxygenase activation protein, zeta polypeptide
mmu-miR-34a	Kitl	Yes	1	17311	kit ligand
mmu-miR-1	Ccnd1	Yes	1	12443	cyclin D1
mmu-miR-1	Pdcd10	Yes	1	56426	programmed cell death 10
mmu-miR-30c	Zeb2	Yes	1	24136	zinc finger E-box binding homeobox 2
mmu-miR-30d	Zeb2	Yes	1	24136	zinc finger E-box binding homeobox 2
mmu-miR-1	Ywhab	Yes	1	54401	tyrosine 3-monooxygenase/tryptophan 5-monooxygenase activation protein, beta polypeptide
mmu-miR-1	Snai2	Yes	1	20583	snail homolog 2 (Drosophila)
mmu-miR-29c	Trp53inp1	Yes	1	60599	transformation related protein 53 inducible nuclear protein 1
mmu-miR-30c	Kras	Yes	1	16653	v-Ki-ras2 Kirsten rat sarcoma viral oncogene homolog
mmu-miR-30d	Kras	Yes	1	16653	v-Ki-ras2 Kirsten rat sarcoma viral oncogene homolog
mmu-miR-29c	Sgk1	Yes	1	20393	serum/glucocorticoid regulated kinase 1
mmu-miR-30c	Pdcd10	Yes	1	56426	programmed cell death 10
mmu-miR-30d	Pdcd10	Yes	1	56426	programmed cell death 10
mmu-miR-30c	Sox9	Yes	1	20682	SRY-box containing gene 9
mmu-miR-30d	Sox9	Yes	1	20682	SRY-box containing gene 9
mmu-miR-1	Rasa1	Yes	1	218397	RAS p21 protein activator 1
mmu-miR-29c	Itgb1	Yes	1	16412	integrin beta 1 (fibronectin receptor beta)
mmu-miR-27a	Mapk14	Yes	1	26416	mitogen-activated protein kinase 14
mmu-miR-27a	Irs1	Yes	1	16367	insulin receptor substrate 1
mmu-miR-29c	Rybp	Yes	1	56353	RING1 and YY1 binding protein
mmu-miR-29c	Bak1	Yes	1	12018	BCL2-antagonist/killer 1
mmu-miR-29c	Mapk10	Yes	1	26414	mitogen-activated protein kinase 10
mmu-miR-29c	Apc	Yes	1	11789	adenomatosis polyposis coli
mmu-miR-29c	Hip1	Yes	1	215114	huntingtin interacting protein 1
mmu-miR-1	Ywhaz	Yes	1	22631	tyrosine 3-monooxygenase/tryptophan 5-monooxygenase activation protein, zeta polypeptide
mmu-miR-30c	Bcl2	Yes	1	12043	B-cell leukemia/lymphoma 2
mmu-miR-30d	Bcl2	Yes	1	12043	B-cell leukemia/lymphoma 2
mmu-miR-1	Igf1	Yes	1	16000	insulin-like growth factor 1
mmu-miR-29c	Mcl1	Yes	1	17210	myeloid cell leukemia sequence 1
mmu-miR-30c	Sos1	Yes	1	20662	son of sevenless homolog 1 (Drosophila)
mmu-miR-30d	Sos1	Yes	1	20662	son of sevenless homolog 1 (Drosophila)
mmu-miR-27a	Sema6a	Yes	1	20358	sema domain, transmembrane domain (TM), and cytoplasmic domain, (semaphorin) 6A
mmu-miR-27a	Irf4	Yes	1	16364	interferon regulatory factor 4
mmu-miR-30c	Rasa1	Yes	1	218397	RAS p21 protein activator 1
mmu-miR-30d	Rasa1	Yes	1	218397	RAS p21 protein activator 1
mmu-miR-29c	Igf1	Yes	1	16000	insulin-like growth factor 1
mmu-miR-149	Pde1a	Yes	1	18573	phosphodiesterase 1A, calmodulin-dependent
mmu-miR-149	Rap1a	Yes	1	109905	RAS-related protein-1a
mmu-miR-149	Ywhaz	Yes	1	22631	tyrosine 3-monooxygenase/tryptophan 5-monooxygenase activation protein, zeta polypeptide
mmu-miR-486	Pdpk1	Yes	1	18607	3-phosphoinositide dependent protein kinase-1
mmu-miR-10b	Hrk	No	0	12123	harakiri, BCL2 interacting protein (contains only BH3 domain)
mmu-miR-10b	Pten	No	0	19211	phosphatase and tensin homolog
mmu-miR-146a	Lrrc15	No	0	74488	leucine rich repeat containing 15
mmu-miR-146b	Lrrc15	No	0	74488	leucine rich repeat containing 15
mmu-miR-30c	Omg	No	0	18377	oligodendrocyte myelin glycoprotein
mmu-miR-30d	Omg	No	0	18377	oligodendrocyte myelin glycoprotein
mmu-miR-499	Top1	No	0	21969	topoisomerase (DNA) I
mmu-miR-21	Bcl11b	No	0	58208	B-cell leukemia/lymphoma 11B
mmu-miR-27a	Gatad2a	No	0	234366	GATA zinc finger domain containing 2A
mmu-miR-1	Mapk3	No	0	26417	mitogen-activated protein kinase 3
mmu-miR-27a	Gab1	No	0	14388	growth factor receptor bound protein 2-associated protein 1
mmu-miR-1	Vegfa	No	0	22339	vascular endothelial growth factor A
mmu-miR-34a	Dgkz	No	0	104418	diacylglycerol kinase zeta
mmu-miR-221	Prkacb	No	0	18749	protein kinase, cAMP dependent, catalytic, beta
mmu-miR-222	Prkacb	No	0	18749	protein kinase, cAMP dependent, catalytic, beta
mmu-miR-21	Il21	No	0	60505	interleukin 21
mmu-miR-21	Cd247	No	0	12503	CD247 antigen
mmu-miR-34a	Serpinf2	No	0	18816	serine (or cysteine) peptidase inhibitor, clade F, member 2
mmu-miR-1	Mkl1	No	0	223701	MKL (megakaryoblastic leukemia)/myocardin-like 1
mmu-miR-10b	Camk2b	No	0	12323	calcium/calmodulin-dependent protein kinase II, beta
mmu-miR-21	Hrk	No	0	12123	harakiri, BCL2 interacting protein (contains only BH3 domain)
mmu-miR-30c	Ube2d2	No	0	56550	ubiquitin-conjugating enzyme E2D 2
mmu-miR-30d	Ube2d2	No	0	56550	ubiquitin-conjugating enzyme E2D 2
mmu-miR-214	Bcl11b	No	0	58208	B-cell leukemia/lymphoma 11B
mmu-miR-29c	Gsk3b	No	0	56637	glycogen synthase kinase 3 beta
mmu-miR-214	Scn2a1	No	0	110876	sodium channel, voltage-gated, type II, alpha 1
mmu-miR-223	Scn2a1	No	0	110876	sodium channel, voltage-gated, type II, alpha 1
mmu-miR-10b	Mapkbp1	No	0	26390	mitogen-activated protein kinase binding protein 1
mmu-miR-214	Ctnnb1	No	0	12387	catenin (cadherin associated protein), beta 1
mmu-miR-199a-5p	Vegfa	No	0	22339	vascular endothelial growth factor A
mmu-miR-214	Psmf1	No	0	228769	proteasome (prosome, macropain) inhibitor subunit 1
mmu-miR-27a	Reln	No	0	19699	reelin
mmu-miR-27a	Rgl1	No	0	19731	ral guanine nucleotide dissociation stimulator,-like 1
mmu-miR-214	Adora2a	No	0	11540	adenosine A2a receptor
mmu-miR-214	Lrp8	No	0	16975	low density lipoprotein receptor-related protein 8, apolipoprotein e receptor
mmu-miR-199a-5p	Gsk3b	No	0	56637	glycogen synthase kinase 3 beta
mmu-miR-27a	Hrk	No	0	12123	harakiri, BCL2 interacting protein (contains only BH3 domain)
mmu-miR-27a	Prkcq	No	0	18761	protein kinase C, theta
mmu-miR-29c	Vegfa	No	0	22339	vascular endothelial growth factor A
mmu-miR-499	Bcl11b	No	0	58208	B-cell leukemia/lymphoma 11B
mmu-miR-30c	Il1a	No	0	16175	interleukin 1 alpha
mmu-miR-30d	Il1a	No	0	16175	interleukin 1 alpha
mmu-miR-1	Mapkbp1	No	0	26390	mitogen-activated protein kinase binding protein 1
mmu-miR-29c	Ltbr	No	0	17000	lymphotoxin B receptor
mmu-miR-27a	Serinc3	No	0	26943	serine incorporator 3
mmu-miR-30c	Atg5	No	0	11793	autophagy-related 5 (yeast)
mmu-miR-30d	Atg5	No	0	11793	autophagy-related 5 (yeast)
mmu-miR-34a	Bcl11b	No	0	58208	B-cell leukemia/lymphoma 11B
mmu-miR-199a-5p	Ncstn	No	0	59287	nicastrin
mmu-miR-34a	Prkacb	No	0	18749	protein kinase, cAMP dependent, catalytic, beta
mmu-miR-34a	Accn1	No	0	11418	amiloride-sensitive cation channel 1, neuronal (degenerin)
mmu-miR-27a	Foxo1	No	0	56458	forkhead box O1
mmu-miR-1	Dgkg	No	0	110197	diacylglycerol kinase, gamma
mmu-miR-27a	Axud1	No	0	215418	AXIN1 up-regulated 1
mmu-miR-1	Bag4	No	0	67384	BCL2-associated athanogene 4
mmu-miR-199a-5p	Map3k5	No	0	26408	mitogen-activated protein kinase kinase kinase 5
mmu-miR-1	Prkacb	No	0	18749	protein kinase, cAMP dependent, catalytic, beta
mmu-miR-30c	Bcl11b	No	0	58208	B-cell leukemia/lymphoma 11B
mmu-miR-30d	Bcl11b	No	0	58208	B-cell leukemia/lymphoma 11B
mmu-miR-29c	Bcl11b	No	0	58208	B-cell leukemia/lymphoma 11B
mmu-miR-30c	Map3k5	No	0	26408	mitogen-activated protein kinase kinase kinase 5
mmu-miR-30d	Map3k5	No	0	26408	mitogen-activated protein kinase kinase kinase 5
mmu-miR-30c	Scn2a1	No	0	110876	sodium channel, voltage-gated, type II, alpha 1
mmu-miR-30d	Scn2a1	No	0	110876	sodium channel, voltage-gated, type II, alpha 1
mmu-miR-1	Calm1	No	0	12313	calmodulin 1
mmu-miR-27a	Mapk8ip3	No	0	30957	mitogen-activated protein kinase 8 interacting protein 3
mmu-miR-29c	Nras	No	0	18176	neuroblastoma ras oncogene
mmu-miR-29c	Mapkbp1	No	0	26390	mitogen-activated protein kinase binding protein 1
mmu-miR-1	Fgf4	No	0	14175	fibroblast growth factor 4
mmu-miR-30c	Ap2a1	No	0	11771	adaptor protein complex AP-2, alpha 1 subunit
mmu-miR-30d	Ap2a1	No	0	11771	adaptor protein complex AP-2, alpha 1 subunit
mmu-miR-1	Rit2	No	0	19762	Ras-like without CAAX 2
mmu-miR-30c	Dgkz	No	0	104418	diacylglycerol kinase zeta
mmu-miR-30d	Dgkz	No	0	104418	diacylglycerol kinase zeta
mmu-miR-29c	Sh3glb1	No	0	54673	SH3-domain GRB2-like B1 (endophilin)
mmu-miR-30c	Eya2	No	0	14049	eyes absent 2 homolog (Drosophila)
mmu-miR-30d	Eya2	No	0	14049	eyes absent 2 homolog (Drosophila)
mmu-miR-29c	Pten	No	0	19211	phosphatase and tensin homolog
mmu-miR-29c	Hrk	No	0	12123	harakiri, BCL2 interacting protein (contains only BH3 domain)
mmu-miR-30c	Nr3c1	No	0	14815	nuclear receptor subfamily 3, group C, member 1
mmu-miR-30d	Nr3c1	No	0	14815	nuclear receptor subfamily 3, group C, member 1
mmu-miR-30c	Sgk3	No	0	170755	serum/glucocorticoid regulated kinase 3
mmu-miR-30d	Sgk3	No	0	170755	serum/glucocorticoid regulated kinase 3
mmu-miR-149	Bag4	No	0	67384	BCL2-associated athanogene 4
mmu-miR-149	Pml	No	0	18854	promyelocytic leukemia
mmu-miR-149	Top1	No	0	21969	topoisomerase (DNA) I
mmu-miR-486	Foxo1	No	0	56458	forkhead box O1
mmu-miR-486	Pten	No	0	19211	phosphatase and tensin homolog
mmu-miR-27a	Bag2	No	-1	213539	BCL2-associated athanogene 2
mmu-miR-10b	Map3k7	No	-1	26409	mitogen-activated protein kinase kinase kinase 7
mmu-miR-21	Bcl2	No	-1	12043	B-cell leukemia/lymphoma 2
mmu-miR-221	Mapk10	No	-1	26414	mitogen-activated protein kinase 10
mmu-miR-221	Zeb2	No	-1	24136	zinc finger E-box binding homeobox 2
mmu-miR-222	Mapk10	No	-1	26414	mitogen-activated protein kinase 10
mmu-miR-222	Zeb2	No	-1	24136	zinc finger E-box binding homeobox 2
mmu-miR-30c	Ddit4	No	-1	74747	DNA-damage-inducible transcript 4
mmu-miR-30d	Ddit4	No	-1	74747	DNA-damage-inducible transcript 4
mmu-miR-30c	Rps6ka5	No	-1	73086	ribosomal protein S6 kinase, polypeptide 5
mmu-miR-30d	Rps6ka5	No	-1	73086	ribosomal protein S6 kinase, polypeptide 5
mmu-miR-30c	Ceacam1	No	-1	26365	carcinoembryonic antigen-related cell adhesion molecule 1
mmu-miR-30d	Ceacam1	No	-1	26365	carcinoembryonic antigen-related cell adhesion molecule 1
mmu-miR-34a	Map2k1	No	-1	26395	mitogen-activated protein kinase kinase 1
mmu-miR-27a	Sgpp1	No	-1	81535	sphingosine-1-phosphate phosphatase 1
mmu-miR-21	Cadm1	No	-1	54725	cell adhesion molecule 1
mmu-miR-223	Pdpk1	No	-1	18607	3-phosphoinositide dependent protein kinase-1
mmu-miR-21	Ube2d3	No	-1	66105	ubiquitin-conjugating enzyme E2D 3 (UBC4/5 homolog, yeast)
mmu-miR-199a-5p	FAM188A	No	-1	66960	RIKEN cDNA 2310047O13 gene
mmu-miR-10b	Crk	No	-1	12928	v-crk sarcoma virus CT10 oncogene homolog (avian)
mmu-miR-27a	Pde1a	No	-1	18573	phosphodiesterase 1A, calmodulin-dependent
mmu-miR-221	Crk	No	-1	12928	v-crk sarcoma virus CT10 oncogene homolog (avian)
mmu-miR-222	Crk	No	-1	12928	v-crk sarcoma virus CT10 oncogene homolog (avian)
mmu-miR-27a	Mapk10	No	-1	26414	mitogen-activated protein kinase 10
mmu-miR-214	Pik3cb	No	-1	74769	phosphatidylinositol 3-kinase, catalytic, beta polypeptide
mmu-miR-27a	Ywhab	No	-1	54401	tyrosine 3-monooxygenase/tryptophan 5-monooxygenase activation protein, beta polypeptide
mmu-miR-21	Rasa1	No	-1	218397	RAS p21 protein activator 1
mmu-miR-21	Mapk10	No	-1	26414	mitogen-activated protein kinase 10
mmu-miR-27a	Mcl1	No	-1	17210	myeloid cell leukemia sequence 1
mmu-miR-214	Ube2z	No	-1	268470	ubiquitin-conjugating enzyme E2Z (putative)
mmu-miR-214	Zbtb16	No	-1	235320	zinc finger and BTB domain containing 16
mmu-miR-214	Creb1	No	-1	12912	cAMP responsive element binding protein 1
mmu-miR-21	Pdcd4	No	-1	18569	programmed cell death 4
mmu-miR-214	Csf1	No	-1	12977	colony stimulating factor 1 (macrophage)
mmu-miR-223	Rasa1	No	-1	218397	RAS p21 protein activator 1
mmu-miR-214	Ywhaz	No	-1	22631	tyrosine 3-monooxygenase/tryptophan 5-monooxygenase activation protein, zeta polypeptide
mmu-miR-27a	Prkcd	No	-1	18753	protein kinase C, delta
mmu-miR-10b	Creb1	No	-1	12912	cAMP responsive element binding protein 1
mmu-miR-30c	Bcl2l13	No	-1	94044	BCL2-like 13 (apoptosis facilitator)
mmu-miR-30d	Bcl2l13	No	-1	94044	BCL2-like 13 (apoptosis facilitator)
mmu-miR-1	Sod1	No	-1	20655	superoxide dismutase 1, soluble
mmu-miR-21	Map3k1	No	-1	26401	mitogen-activated protein kinase kinase kinase 1
mmu-miR-199a-5p	Serpine1	No	-1	18787	serine (or cysteine) peptidase inhibitor, clade E, member 1
mmu-miR-27a	Kras	No	-1	16653	v-Ki-ras2 Kirsten rat sarcoma viral oncogene homolog
mmu-miR-27a	Rffl	No	-1	67338	ring finger and FYVE like domain containing protein
mmu-miR-34a	Ccnd1	No	-1	12443	cyclin D1
mmu-miR-27a	Igf1	No	-1	16000	insulin-like growth factor 1
mmu-miR-34a	Bcl2	No	-1	12043	B-cell leukemia/lymphoma 2
mmu-miR-34a	Gas1	No	-1	14451	growth arrest specific 1
mmu-miR-27a	Sos1	No	-1	20662	son of sevenless homolog 1 (Drosophila)
mmu-miR-199a-5p	Foxc2	No	-1	14234	forkhead box C2
mmu-miR-27a	Apc	No	-1	11789	adenomatosis polyposis coli
mmu-miR-34a	Met	No	-1	17295	met proto-oncogene
mmu-miR-34a	Serpine1	No	-1	18787	serine (or cysteine) peptidase inhibitor, clade E, member 1
mmu-miR-34a	Rps6ka4	No	-1	56613	ribosomal protein S6 kinase, polypeptide 4
mmu-miR-27a	Met	No	-1	17295	met proto-oncogene
mmu-miR-30c	Irs1	No	-1	16367	insulin receptor substrate 1
mmu-miR-30d	Irs1	No	-1	16367	insulin receptor substrate 1
mmu-miR-27a	Pdpk1	No	-1	18607	3-phosphoinositide dependent protein kinase-1
mmu-miR-27a	Rybp	No	-1	56353	RING1 and YY1 binding protein
mmu-miR-34a	Zdhhc16	No	-1	74168	zinc finger, DHHC domain containing 16
mmu-miR-1	Kcnip3	No	-1	56461	Kv channel interacting protein 3, calsenilin
mmu-miR-27a	Hip1	No	-1	215114	huntingtin interacting protein 1
mmu-miR-27a	Creb1	No	-1	12912	cAMP responsive element binding protein 1
mmu-miR-27a	Csf1	No	-1	12977	colony stimulating factor 1 (macrophage)
mmu-miR-30c	Irf4	No	-1	16364	interferon regulatory factor 4
mmu-miR-30d	Irf4	No	-1	16364	interferon regulatory factor 4
mmu-miR-185	Mapk14	No	-1	26416	mitogen-activated protein kinase 14
mmu-miR-21	Notch2	No	-2	18129	Notch gene homolog 2 (Drosophila)
mmu-miR-146a	Btg2	No	-2	12227	B-cell translocation gene 2, anti-proliferative
mmu-miR-146b	Btg2	No	-2	12227	B-cell translocation gene 2, anti-proliferative
mmu-miR-27a	Arf6	No	-2	11845	ADP-ribosylation factor 6
mmu-miR-27a	Zmat3	No	-2	22401	zinc finger matrin type 3
mmu-miR-223	Adcy7	No	-2	11513	adenylate cyclase 7
mmu-miR-1	Hand2	No	-2	15111	heart and neural crest derivatives expressed transcript 2
mmu-miR-21	Btg2	No	-2	12227	B-cell translocation gene 2, anti-proliferative
mmu-miR-221	Camk1d	No	-2	227541	calcium/calmodulin-dependent protein kinase ID
mmu-miR-222	Camk1d	No	-2	227541	calcium/calmodulin-dependent protein kinase ID
mmu-miR-223	Atp7a	No	-2	11977	ATPase, Cu++ transporting, alpha polypeptide
mmu-miR-214	Notch2	No	-2	18129	Notch gene homolog 2 (Drosophila)
mmu-miR-223	Igf1r	No	-2	16001	insulin-like growth factor I receptor
mmu-miR-221	Fos	No	-2	14281	FBJ osteosarcoma oncogene
mmu-miR-222	Fos	No	-2	14281	FBJ osteosarcoma oncogene
mmu-miR-21	Tgfbr2	No	-2	21813	transforming growth factor, beta receptor II
mmu-miR-27a	Camk1d	No	-2	227541	calcium/calmodulin-dependent protein kinase ID
mmu-miR-214	Sulf1	No	-2	240725	sulfatase 1
mmu-miR-199a-5p	Hif1a	No	-2	15251	hypoxia inducible factor 1, alpha subunit
mmu-miR-214	Traf3	No	-2	22031	TNF receptor-associated factor 3
mmu-miR-214	Rassf5	No	-2	54354	Ras association (RalGDS/AF-6) domain family member 5
mmu-miR-199a-5p	P2rx7	No	-2	18439	purinergic receptor P2X, ligand-gated ion channel, 7
mmu-miR-214	Cdk6	No	-2	12571	cyclin-dependent kinase 6
mmu-miR-27a	Btg1	No	-2	12226	B-cell translocation gene 1, anti-proliferative
mmu-miR-27a	Rassf5	No	-2	54354	Ras association (RalGDS/AF-6) domain family member 5
mmu-miR-199a-5p	Rock1	No	-2	19877	Rho-associated coiled-coil containing protein kinase 1
mmu-miR-221	Btg2	No	-2	12227	B-cell translocation gene 2, anti-proliferative
mmu-miR-222	Btg2	No	-2	12227	B-cell translocation gene 2, anti-proliferative
mmu-miR-27a	Bcl3	No	-2	12051	B-cell leukemia/lymphoma 3
mmu-miR-27a	Btg2	No	-2	12227	B-cell translocation gene 2, anti-proliferative
mmu-miR-199a-5p	Stk4	No	-2	58231	serine/threonine kinase 4
mmu-miR-199a-5p	Traf3	No	-2	22031	TNF receptor-associated factor 3
mmu-miR-199a-5p	Pxn	No	-2	19303	paxillin
mmu-miR-27a	Prkcb	No	-2	18751	protein kinase C, beta
mmu-miR-29c	Map2k6	No	-2	26399	mitogen-activated protein kinase kinase 6
mmu-miR-34a	Notch2	No	-2	18129	Notch gene homolog 2 (Drosophila)
mmu-miR-27a	Traf3	No	-2	22031	TNF receptor-associated factor 3
mmu-miR-27a	Plk2	No	-2	20620	polo-like kinase 2 (Drosophila)
mmu-miR-29c	Pik3r1	No	-2	18708	phosphatidylinositol 3-kinase, regulatory subunit, polypeptide 1 (p85 alpha)
mmu-miR-199a-5p	Sulf1	No	-2	240725	sulfatase 1
mmu-miR-34a	Pea15a	No	-2	18611	phosphoprotein enriched in astrocytes 15A
mmu-miR-199a-5p	Tgfb2	No	-2	21808	transforming growth factor, beta 2
mmu-miR-30c	Rps6ka2	No	-2	20112	ribosomal protein S6 kinase, polypeptide 2
mmu-miR-30d	Rps6ka2	No	-2	20112	ribosomal protein S6 kinase, polypeptide 2
mmu-miR-486	Pik3r1	No	-2	18708	phosphatidylinositol 3-kinase, regulatory subunit, polypeptide 1 (p85 alpha)
mmu-miR-223	Hsp90b1	No	-3	22027	heat shock protein 90, beta (Grp94), member 1
mmu-miR-27a	Hsp90aa1	No	-3	15519	heat shock protein 90, alpha (cytosolic), class A member 1
