# Supplementary material for: Systems analysis reveals down-regulation of a network of pro-survival miRNAs drives the apoptotic response in dilated cardiomyopathy
Source: Royal Society of Chemistry journal article supplement (doi:10.1039/c4mb00265b), 2014-10-20
Supplement: c4mb00265b5.xlsx [file c4mb00265b5.xlsx]

## Sheet: FINAL
Supplementary table 1		Summary of all scheduled SRM transitions tested for each mir including parent to product ion tarnsitions monitored, s-lens, dwell time, and scheduling start and stop time
Parent	Product	CE	Dwell Time	Start time (min)	Stop time (min)	Peptide	Mir
423.716	645.356	17	0.025	0	15	NSAAATSPK	mir10b
423.717	574.319	17	0.025	0	15	NSAAATSPK	mir10b
423.718	432.245	17	0.025	0	15	NSAAATSPK	mir10b
423.719	331.197	17	0.025	0	15	NSAAATSPK	mir10b
345.686	262.15	14	0.025	0	30	GSGARSR	mir10b
345.687	418.252	14	0.025	0	30	GSGARSR	mir10b
345.688	489.289	14	0.025	0	30	GSGARSR	mir10b
345.689	546.31	14	0.025	0	30	GSGARSR	mir10b
439.266	678.43	18	0.025	0	30	AGAPLPVPR	mir10b
439.267	581.377	18	0.025	0	30	AGAPLPVPR	mir10b
439.268	468.293	18	0.025	0	30	AGAPLPVPR	mir10b
472.743	373.255	19	0.025	0	30	NNIDDVVR	mir10b
472.744	488.282	19	0.025	0	30	NNIDDVVR	mir10b
472.745	603.309	19	0.025	0	30	NNIDDVVR	mir10b
472.746	716.393	19	0.025	0	30	NNIDDVVR	mir10b
489.23	736.311	19	0.025	0	30	QIESESER	mir10b
489.231	607.268	19	0.025	0	30	QIESESER	mir10b
489.232	520.236	19	0.025	0	30	QIESESER	mir10b
549.286	411.246	21	0.025	0	30	GHFPFTHVR	mir10b
549.287	512.293	21	0.025	0	30	GHFPFTHVR	mir10b
549.288	756.415	21	0.025	0	30	GHFPFTHVR	mir10b
549.289	903.483	21	0.025	0	30	GHFPFTHVR	mir10b
403.703	707.335	16	0.025	0	40	VPNAYDK	mir10b
403.704	610.283	16	0.025	0	40	VPNAYDK	mir10b
403.705	496.24	16	0.025	0	40	VPNAYDK	mir10b
403.706	425.203	16	0.025	0	40	VPNAYDK	mir10b
635.351	856.489	24	0.025	0	40	WVQPGVELSVR	mir10b
635.352	759.436	24	0.025	0	40	WVQPGVELSVR	mir10b
635.353	702.414	24	0.025	0	40	WVQPGVELSVR	mir10b
379.232	288.203	16	0.025	0	50	QLEVIR	mir10b
379.233	387.271	16	0.025	0	50	QLEVIR	mir10b
379.234	516.314	16	0.025	0	50	QLEVIR	mir10b
379.235	629.398	16	0.025	0	50	QLEVIR	mir10b
507.774	359.192	20	0.025	0	50	GPGHPPLPDK	mir10b
507.775	569.329	20	0.025	0	50	GPGHPPLPDK	mir10b
507.776	666.382	20	0.025	0	50	GPGHPPLPDK	mir10b
507.777	860.462	20	0.025	0	50	GPGHPPLPDK	mir10b
727.386	998.527	28	0.025	0	80	ILNDLSSDAPGVPR	mir10b
727.387	885.442	28	0.025	0	80	ILNDLSSDAPGVPR	mir10b
727.388	798.41	28	0.025	0	80	ILNDLSSDAPGVPR	mir10b
727.389	525.314	28	0.025	0	80	ILNDLSSDAPGVPR	mir10b
789.872	803.382	30	0.05	20	40	FPYSPSPPM[Oxid]ANGAAR	mir10b
789.873	1084.52	30	0.05	20	40	FPYSPSPPM[Oxid]ANGAAR	mir10b
789.874	1171.55	30	0.05	20	40	FPYSPSPPM[Oxid]ANGAAR	mir10b
789.875	1334.62	30	0.05	20	40	FPYSPSPPM[Oxid]ANGAAR	mir10b
589.846	553.346	23	0.025	20	50	ALASVPSPALPR	mir10b
589.847	640.378	23	0.025	20	50	ALASVPSPALPR	mir10b
589.848	836.499	23	0.025	20	50	ALASVPSPALPR	mir10b
589.849	737.43	23	0.025	20	50	ALASVPSPALPR	mir10b
679.82	768.399	26	0.025	20	50	FEAENGPTPSPGR	mir10b
679.821	882.442	26	0.025	20	50	FEAENGPTPSPGR	mir10b
679.822	1011.49	26	0.025	20	50	FEAENGPTPSPGR	mir10b
679.823	1082.52	26	0.025	20	50	FEAENGPTPSPGR	mir10b
816.382	329.193	31	0.025	20	50	SVSFEAENGPTPSPGR	mir10b
816.383	513.278	31	0.025	20	80	SVSFEAENGPTPSPGR	mir10b
816.384	711.378	31	0.025	20	80	SVSFEAENGPTPSPGR	mir10b
816.385	882.443	31	0.025	20	80	SVSFEAENGPTPSPGR	mir10b
816.386	1011.49	31	0.025	20	80	SVSFEAENGPTPSPGR	mir10b
816.387	1082.52	31	0.025	20	80	SVSFEAENGPTPSPGR	mir10b
493.286	789.446	19	0.025	30	40	VPDILSSVR	mir10b
493.287	448.251	19	0.025	30	40	VPDILSSVR	mir10b
493.288	561.335	19	0.025	30	40	VPDILSSVR	mir10b
493.289	674.419	19	0.025	30	40	VPDILSSVR	mir10b
655.383	361.219	25	0.025	30	40	APRVPDILSSVR	mir10b
655.384	674.419	25	0.025	30	40	APRVPDILSSVR	mir10b
655.385	886.499	25	0.025	30	40	APRVPDILSSVR	mir10b
655.386	985.567	25	0.025	30	40	APRVPDILSSVR	mir10b
655.387	1238.72	25	0.025	30	40	APRVPDILSSVR	mir10b
670.312	746.331	26	0.025	30	40	QSPSPPPEEESR	mir10b
670.313	843.384	26	0.025	30	40	QSPSPPPEEESR	mir10b
670.314	940.437	26	0.025	30	40	QSPSPPPEEESR	mir10b
670.315	1124.52	26	0.025	30	40	QSPSPPPEEESR	mir10b
744.862	1431.7	28	0.025	30	50	GPSADLLEDLSESR	mir10b
744.863	1061.55	28	0.025	30	50	GPSADLLEDLSESR	mir10b
744.864	948.463	28	0.025	30	50	GPSADLLEDLSESR	mir10b
744.865	835.379	28	0.025	30	50	GPSADLLEDLSESR	mir10b
762.063	1480.78	37	0.025	30	80	TASFGNILDVPEIVISGNGQPR	mir10b
762.064	1365.75	37	0.025	30	80	TASFGNILDVPEIVISGNGQPR	mir10b
762.065	1266.68	37	0.025	30	80	TASFGNILDVPEIVISGNGQPR	mir10b
762.066	1169.63	37	0.025	30	80	TASFGNILDVPEIVISGNGQPR	mir10b
762.067	1040.58	37	0.025	30	80	TASFGNILDVPEIVISGNGQPR	mir10b
762.068	927.5	37	0.025	30	80	TASFGNILDVPEIVISGNGQPR	mir10b
762.069	828.432	37	0.025	30	80	TASFGNILDVPEIVISGNGQPR	mir10b
938.062	1458.69	44	0.025	30	80	YSDTTDSDPENEPFDEDQHTQITK	mir10b
938.063	1214.57	44	0.025	30	80	YSDTTDSDPENEPFDEDQHTQITK	mir10b
938.064	1099.54	44	0.025	30	80	YSDTTDSDPENEPFDEDQHTQITK	mir10b
938.065	970.495	44	0.025	30	80	YSDTTDSDPENEPFDEDQHTQITK	mir10b
946.483	972.474	45	0.025	30	80	TAPTSTIAPGVVM[Oxid]ASSPALPTQPAEEAAR	mir10b
946.484	1069.53	45	0.025	30	80	TAPTSTIAPGVVM[Oxid]ASSPALPTQPAEEAAR	mir10b
946.485	1182.61	45	0.025	30	80	TAPTSTIAPGVVM[Oxid]ASSPALPTQPAEEAAR	mir10b
946.486	1253.65	45	0.025	30	80	TAPTSTIAPGVVM[Oxid]ASSPALPTQPAEEAAR	mir10b
946.487	1350.7	45	0.025	30	80	TAPTSTIAPGVVM[Oxid]ASSPALPTQPAEEAAR	mir10b
946.488	1437.73	45	0.025	30	80	TAPTSTIAPGVVM[Oxid]ASSPALPTQPAEEAAR	mir10b
996.795	1409.64	47	0.025	30	80	LFSGTQISTIAESEDSQESVDSVTDSQK	mir10b
996.796	1322.61	47	0.025	30	80	LFSGTQISTIAESEDSQESVDSVTDSQK	mir10b
996.797	1194.55	47	0.025	30	80	LFSGTQISTIAESEDSQESVDSVTDSQK	mir10b
996.798	1065.51	47	0.025	30	80	LFSGTQISTIAESEDSQESVDSVTDSQK	mir10b
1049.46	1132.46	49	0.025	30	80	TVEEPSNPEASSSTSVTPDVSDNEPDHYR	mir10b
1049.46	1231.53	49	0.025	30	80	TVEEPSNPEASSSTSVTPDVSDNEPDHYR	mir10b
1049.46	1346.56	49	0.025	30	80	TVEEPSNPEASSSTSVTPDVSDNEPDHYR	mir10b
1049.46	1443.61	49	0.025	30	80	TVEEPSNPEASSSTSVTPDVSDNEPDHYR	mir10b
540.321	462.292	21	0.025	35	50	EYLVLTLTK	mir10b
540.322	575.376	21	0.025	35	50	EYLVLTLTK	mir10b
540.323	674.444	21	0.025	35	50	EYLVLTLTK	mir10b
540.324	787.528	21	0.025	35	50	EYLVLTLTK	mir10b
610.83	416.213	24	0.025	35	50	TITALAFSPDGK	mir10b
610.831	650.314	24	0.025	35	50	TITALAFSPDGK	mir10b
610.832	721.351	24	0.025	35	50	TITALAFSPDGK	mir10b
610.833	834.435	24	0.025	35	50	TITALAFSPDGK	mir10b
621.866	957.561	24	0.025	35	50	TALALEVGELVK	mir10b
621.867	886.524	24	0.025	35	50	TALALEVGELVK	mir10b
621.868	773.44	24	0.025	35	50	TALALEVGELVK	mir10b
621.869	644.397	24	0.025	35	50	TALALEVGELVK	mir10b
699.335	1198.57	27	0.025	35	50	AQEALDFYGEVR	mir10b
699.336	998.494	27	0.025	35	50	AQEALDFYGEVR	mir10b
699.337	885.41	27	0.025	35	50	AQEALDFYGEVR	mir10b
699.338	770.383	27	0.025	35	50	AQEALDFYGEVR	mir10b
488.265	418.24	20	0.02	0	8	SSAAQLTAAR	mir 21
488.265	531.325	20	0.02	0	8	SSAAQLTAAR	mir 21
488.265	659.383	20	0.02	0	8	SSAAQLTAAR	mir 21
488.265	730.421	20	0.02	0	8	SSAAQLTAAR	mir 21
347.698	377.214	15	0.02	0	10	VAFTTR	mir 21
347.698	524.283	15	0.02	0	10	VAFTTR	mir 21
347.698	595.32	15	0.02	0	10	VAFTTR	mir 21
981.951	734.342	35	0.02	0	12	YPTPPSQHSYASSNAAER	mir 21
981.951	968.443	35	0.02	0	12	YPTPPSQHSYASSNAAER	mir 21
981.951	1055.47	35	0.02	0	12	YPTPPSQHSYASSNAAER	mir 21
981.951	1192.53	35	0.02	0	12	YPTPPSQHSYASSNAAER	mir 21
424.221	488.319	16	0.02	0	20	MDPIISR	mir 21
424.221	585.372	16	0.02	0	20	MDPIISR	mir 21
424.221	700.399	16	0.02	0	20	MDPIISR	mir 21
603.31	715.41	21	0.02	0	20	TQSSSNLAELR	mir 21
603.31	802.442	21	0.02	0	20	TQSSSNLAELR	mir 21
603.31	889.474	21	0.02	0	20	TQSSSNLAELR	mir 21
603.31	976.506	21	0.02	0	20	TQSSSNLAELR	mir 21
873.445	795.472	35	0.02	0	35	VSEPVEIGIQVTPDEDDHLLSPTK	mir 21
873.445	1025.53	35	0.02	0	35	VSEPVEIGIQVTPDEDDHLLSPTK	mir 21
873.445	1154.57	35	0.02	0	35	VSEPVEIGIQVTPDEDDHLLSPTK	mir 21
873.445	1366.65	35	0.02	0	35	VSEPVEIGIQVTPDEDDHLLSPTK	mir 21
613.315	854.445	24	0.02	0	40	GISNEGQNASIK[HeavyK]	mir 21
613.316	725.403	24	0.02	0	40	GISNEGQNASIK[HeavyK]	mir 21
493.768	573.338	20	0.02	0	80	SSAAPPPPPR[HeavyR]	mir 21
493.769	670.391	20	0.02	0	80	SSAAPPPPPR[HeavyR]	mir 21
498.804	669.38	20	0.02	0	80	LTILEELR[HeavyR]	mir 21
498.805	782.464	20	0.02	0	80	LTILEELR[HeavyR]	mir 21
452.766	359.24	19	0.02	7	15	ILDFGLAR	mir 21
452.766	416.261	19	0.02	7	15	ILDFGLAR	mir 21
452.766	563.33	19	0.02	7	15	ILDFGLAR	mir 21
452.766	678.357	19	0.02	7	15	ILDFGLAR	mir 21
716.857	794.404	24	0.02	14	30	NPQEGLYNELQK	mir 21
716.857	907.488	24	0.02	14	30	NPQEGLYNELQK	mir 21
716.857	964.51	24	0.02	14	30	NPQEGLYNELQK	mir 21
716.857	1093.55	24	0.02	14	30	NPQEGLYNELQK	mir 21
451.285	576.395	19	0.02	15	40	DIPVPKPK[HeavyK]	mir 21
451.286	673.448	19	0.02	15	40	DIPVPKPK[HeavyK]	mir 21
854.908	674.34	32	0.02	15	42	EEDPHEGKIWFHGK	mir 21
854.908	972.541	32	0.02	15	42	EEDPHEGKIWFHGK	mir 21
854.908	1101.58	32	0.02	15	42	EEDPHEGKIWFHGK	mir 21
854.908	1238.64	32	0.02	15	42	EEDPHEGKIWFHGK	mir 21
597.286	619.305	23	0.02	16	24	LSASSEDISER	mir 21
597.286	748.347	23	0.02	16	24	LSASSEDISER	mir 21
597.286	835.379	23	0.02	16	24	LSASSEDISER	mir 21
597.286	922.411	23	0.02	16	24	LSASSEDISER	mir 21
609.33	448.276	24	0.02	16	24	SQWSPALTISK	mir 21
609.33	729.451	24	0.02	16	24	SQWSPALTISK	mir 21
609.33	816.483	24	0.02	16	24	SQWSPALTISK	mir 21
640.359	1038.53	25	0.02	16	24	LKALGDELHQR	mir 21
609.33	1002.56	24	0.02	16	30	SQWSPALTISK	mir 21
640.359	682.363	25	0.02	16	30	LKALGDELHQR	mir 21
640.359	854.412	25	0.02	16	30	LKALGDELHQR	mir 21
640.359	967.496	25	0.02	16	30	LKALGDELHQR	mir 21
801.402	864.494	27	0.02	16	48	GDFPGTYVEYIGRK	mir 21
801.402	1027.56	27	0.02	16	48	GDFPGTYVEYIGRK	mir 21
801.402	1128.61	27	0.02	16	48	GDFPGTYVEYIGRK	mir 21
801.402	1185.63	27	0.02	16	48	GDFPGTYVEYIGRK	mir 21
801.402	1282.68	27	0.02	16	48	GDFPGTYVEYIGRK	mir 21
529.79	573.324	21	0.02	17	30	SEVAVLSPEK	mir 21
529.79	672.393	21	0.02	17	30	SEVAVLSPEK	mir 21
529.79	743.43	21	0.02	17	30	SEVAVLSPEK	mir 21
529.79	842.498	21	0.02	17	30	SEVAVLSPEK	mir 21
724.362	805.441	28	0.02	19	35	GHDGLYQGLSTATK	mir 21
724.362	968.505	28	0.02	19	35	GHDGLYQGLSTATK	mir 21
724.362	1138.61	28	0.02	19	35	GHDGLYQGLSTATK	mir 21
724.362	1253.64	28	0.02	19	35	GHDGLYQGLSTATK	mir 21
586.81	668.36	23	0.02	20	50	SAAGAFGPELSR[HeavyR]	mir 21
586.811	815.428	23	0.02	20	50	SAAGAFGPELSR[HeavyR]	mir 21
695.833	855.429	27	0.02	20	50	TASEFDSAIAQDK[HeavyK]	mir 21
695.834	1002.5	27	0.02	20	50	TASEFDSAIAQDK[HeavyK]	mir 21
806.133	395.228	35	0.02	20	50	LLLLLFSAAALIPTGDGQNLFTK	mir 21
806.133	922.462	35	0.02	20	50	LLLLLFSAAALIPTGDGQNLFTK	mir 21
806.133	979.484	35	0.02	20	50	LLLLLFSAAALIPTGDGQNLFTK	mir 21
806.133	1080.53	35	0.02	20	50	LLLLLFSAAALIPTGDGQNLFTK	mir 21
882.957	966.468	33	0.02	25	40	ILFPGRDYIDQWNK	mir 21
882.957	1081.49	33	0.02	25	40	ILFPGRDYIDQWNK	mir 21
882.957	1237.6	33	0.02	25	40	ILFPGRDYIDQWNK	mir 21
882.957	1294.62	33	0.02	25	40	ILFPGRDYIDQWNK	mir 21
882.957	1391.67	33	0.02	25	40	ILFPGRDYIDQWNK	mir 21
1015.01	3 1073.569	35	0.02	25	40	LDPTLSVDDLANSGQVGTAR	mir 21
1015.01	3 1303.623	35	0.02	25	40	LDPTLSVDDLANSGQVGTAR	mir 21
1015.01	3 1402.692	35	0.02	25	40	LDPTLSVDDLANSGQVGTAR	mir 21
1015.01	3 1489.724	35	0.02	25	40	LDPTLSVDDLANSGQVGTAR	mir 21
558.325	719.371	22	0.02	25	50	GLILVGGYGTR[HeavyR]	mir 21
558.326	620.302	22	0.02	25	50	GLILVGGYGTR[HeavyR]	mir 21
745.393	942.538	29	0.02	25	50	SFANQPLEVVYSK[HeavyK]	mir 21
745.395	1184.64	29	0.02	25	50	SFANQPLEVVYSK[HeavyK]	mir 21
737.354	899.462	28	0.02	26	45	GDFPGTYVEYIGR	mir 21
737.354	1000.51	28	0.02	26	45	GDFPGTYVEYIGR	mir 21
737.354	1057.53	28	0.02	26	45	GDFPGTYVEYIGR	mir 21
737.354	1154.58	28	0.02	26	45	GDFPGTYVEYIGR	mir 21
735.881	500.257	28	0.02	28	45	SDDSVIQLLNPNR	mir 21
735.881	854.484	28	0.02	28	45	SDDSVIQLLNPNR	mir 21
735.881	967.568	28	0.02	28	45	SDDSVIQLLNPNR	mir 21
735.881	1066.64	28	0.02	28	45	SDDSVIQLLNPNR	mir 21
519.77	440.236	21	0.02	30	45	ALGDELHQR	mir 21
519.77	553.321	21	0.02	30	45	ALGDELHQR	mir 21
519.77	682.363	21	0.02	30	45	ALGDELHQR	mir 21
519.77	854.412	21	0.02	30	45	ALGDELHQR	mir 21
745.404	763.435	29	0.02	30	45	SVQNLANLVEFGAK	mir 21
745.404	877.478	29	0.02	30	45	SVQNLANLVEFGAK	mir 21
745.404	948.515	29	0.02	30	45	SVQNLANLVEFGAK	mir 21
745.404	1175.64	29	0.02	30	45	SVQNLANLVEFGAK	mir 21
600.348	691.389	24	0.02	30	50	APQLVGQFIAR	mir 21
600.348	790.457	24	0.02	30	50	APQLVGQFIAR	mir 21
600.348	903.541	24	0.02	30	50	APQLVGQFIAR	mir 21
600.348	1031.6	24	0.02	30	50	APQLVGQFIAR	mir 21
800.41	865.441	31	0.02	30	50	HENILQFLTAEER	mir 21
800.41	993.5	31	0.02	30	50	HENILQFLTAEER	mir 21
800.41	1106.58	31	0.02	30	50	HENILQFLTAEER	mir 21
800.41	1333.71	31	0.02	30	50	HENILQFLTAEER	mir 21
569.78	609.299	23	0.02	32	50	DPFLGFTDAR	mir 21
569.78	666.321	23	0.02	32	50	DPFLGFTDAR	mir 21
569.78	779.405	23	0.02	32	50	DPFLGFTDAR	mir 21
569.78	926.473	23	0.02	32	50	DPFLGFTDAR	mir 21
604.859	640.353	24	0.02	32	50	ALGTLLHTNLR	mir 21
604.859	753.437	24	0.02	32	50	ALGTLLHTNLR	mir 21
604.859	866.521	24	0.02	32	50	ALGTLLHTNLR	mir 21
604.859	1024.59	24	0.02	32	50	ALGTLLHTNLR	mir 21
991.481	434.26	35	0.02	32	50	TATGYGFAEPYNLYSSLK	mir 21
991.481	1084.57	35	0.02	32	50	TATGYGFAEPYNLYSSLK	mir 21
991.481	1213.61	35	0.02	32	50	TATGYGFAEPYNLYSSLK	mir 21
991.481	1284.65	35	0.02	32	50	TATGYGFAEPYNLYSSLK	mir 21
635.392	758.441	25	0.02	33	50	LLAITELLQQK	mir 21
635.392	859.488	25	0.02	33	50	LLAITELLQQK	mir 21
635.392	972.572	25	0.02	33	50	LLAITELLQQK	mir 21
635.392	1043.61	25	0.02	33	50	LLAITELLQQK	mir 21
829.424	853.441	35	0.02	34	80	IYNEIPDINLDVPHSYSVLER	mir 21
829.424	1087.55	35	0.02	34	80	IYNEIPDINLDVPHSYSVLER	mir 21
829.424	1186.62	35	0.02	34	80	IYNEIPDINLDVPHSYSVLER	mir 21
829.424	1301.65	35	0.02	34	80	IYNEIPDINLDVPHSYSVLER	mir 21
605.827	693.357	24	0.02	35	80	FATVVEELFR	mir 21
605.827	792.425	24	0.02	35	80	FATVVEELFR	mir 21
605.827	891.493	24	0.02	35	80	FATVVEELFR	mir 21
605.827	992.541	24	0.02	35	80	FATVVEELFR	mir 21
796.477	846.508	30	0.05	38	60	EPLPPIVTFQLIPK	mir 21
796.477	945.576	30	0.05	38	60	EPLPPIVTFQLIPK	mir 21
796.477	1155.71	30	0.05	38	60	EPLPPIVTFQLIPK	mir 21
796.477	1252.77	30	0.05	38	60	EPLPPIVTFQLIPK	mir 21
620.333	672.368	24	0.05	40	80	DLPELALDTPR	mir 21
620.333	785.452	24	0.05	40	80	DLPELALDTPR	mir 21
620.333	914.494	24	0.05	40	80	DLPELALDTPR	mir 21
620.333	1011.55	24	0.05	40	80	DLPELALDTPR	mir 21
417.714	434.225	15	0.04	0	20	AIESSAEK	mir 27a method1
417.714	521.257	15	0.04	0	20	AIESSAEK	mir 27a method1
417.714	650.299	15	0.04	0	20	AIESSAEK	mir 27a method1
417.714	763.383	15	0.04	0	20	AIESSAEK	mir 27a method1
416.223	488.319	15	0.02	0	25	MDPIISR	mir 27a method1
416.223	585.372	15	0.02	0	25	MDPIISR	mir 27a method1
416.223	700.399	15	0.02	0	25	MDPIISR	mir 27a method1
375.193	462.231	14	0.02	0	30	ISSESAR	mir 27a method1
375.193	549.263	14	0.02	0	30	ISSESAR	mir 27a method1
375.193	636.295	14	0.02	0	30	ISSESAR	mir 27a method1
799.874	876.406	27	0.02	0	30	AVTEQGHELSNEER	mir 27a method1
799.874	1013.47	27	0.02	0	30	AVTEQGHELSNEER	mir 27a method1
799.874	1070.49	27	0.02	0	30	AVTEQGHELSNEER	mir 27a method1
799.874	1198.55	27	0.02	0	30	AVTEQGHELSNEER	mir 27a method1
613.315	854.445	24	0.02	0	40	GISNEGQNASIK[HeavyK]	mir 27a method1
613.316	725.403	24	0.02	0	40	GISNEGQNASIK[HeavyK]	mir 27a method1
400.243	458.309	15	0.01	0	80	NQVLLGR	mir 27a method1
400.243	557.377	15	0.01	0	80	NQVLLGR	mir 27a method1
400.243	685.436	15	0.01	0	80	NQVLLGR	mir 27a method1
452.766	563.33	17	0.01	0	80	ILDFGLAR	mir 27a method1
452.766	678.357	17	0.01	0	80	ILDFGLAR	mir 27a method1
452.766	791.441	17	0.01	0	80	ILDFGLAR	mir 27a method1
490.238	576.299	18	0.01	0	80	TSTNSQVDK	mir 27a method1
490.238	690.342	18	0.01	0	80	TSTNSQVDK	mir 27a method1
490.238	791.389	18	0.01	0	80	TSTNSQVDK	mir 27a method1
493.768	573.338	20	0.02	0	80	SSAAPPPPPR[HeavyR]	mir 27a method1
493.769	670.391	20	0.02	0	80	SSAAPPPPPR[HeavyR]	mir 27a method1
499.758	369.224	18	0.01	0	80	LCGVEAPPR	mir 27a method1
499.758	569.304	18	0.01	0	80	LCGVEAPPR	mir 27a method1
499.758	668.373	18	0.01	0	80	LCGVEAPPR	mir 27a method1
499.758	725.394	18	0.01	0	80	LCGVEAPPR	mir 27a method1
541.251	575.294	19	0.01	0	80	DYIDQWNK	mir 27a method1
541.251	690.321	19	0.01	0	80	DYIDQWNK	mir 27a method1
541.251	803.405	19	0.01	0	80	DYIDQWNK	mir 27a method1
541.251	966.468	19	0.01	0	80	DYIDQWNK	mir 27a method1
552.79	602.326	20	0.02	0	80	LMELQEAVR	mir 27a method1
552.79	715.41	20	0.02	0	80	LMELQEAVR	mir 27a method1
552.79	844.452	20	0.02	0	80	LMELQEAVR	mir 27a method1
556.266	697.297	20	0.01	0	80	IPGFCEGGFK	mir 27a method1
556.266	844.366	20	0.01	0	80	IPGFCEGGFK	mir 27a method1
556.266	901.387	20	0.01	0	80	IPGFCEGGFK	mir 27a method1
556.266	998.44	20	0.02	0	80	IPGFCEGGFK	mir 27a method1
563.632	601.342	24	0.01	0	80	VTELESVDKSAGQVAR	mir 27a method1
563.632	688.374	24	0.01	0	80	VTELESVDKSAGQVAR	mir 27a method1
563.632	816.469	24	0.01	0	80	VTELESVDKSAGQVAR	mir 27a method1
563.632	931.496	24	0.01	0	80	VTELESVDKSAGQVAR	mir 27a method1
565.816	719.412	20	0.01	0	80	SQVPMIALQK	mir 27a method1
565.816	816.465	20	0.01	0	80	SQVPMIALQK	mir 27a method1
565.816	915.533	20	0.01	0	80	SQVPMIALQK	mir 27a method1
577.809	428.273	20	0.01	0	80	LCGVEAPPRR	mir 27a method1
577.809	525.326	20	0.01	0	80	LCGVEAPPRR	mir 27a method1
577.809	596.363	20	0.01	0	80	LCGVEAPPRR	mir 27a method1
577.809	725.405	20	0.01	0	80	LCGVEAPPRR	mir 27a method1
577.809	824.474	20	0.01	0	80	LCGVEAPPRR	mir 27a method1
608.854	659.42	21	0.01	0	80	SSAAQLTAARLK	mir 27a method1
608.854	772.504	21	0.01	0	80	SSAAQLTAARLK	mir 27a method1
608.854	900.563	21	0.01	0	80	SSAAQLTAARLK	mir 27a method1
609.328	719.368	21	0.02	0	80	NTGLLESQLSR	mir 27a method1
609.328	832.452	21	0.02	0	80	NTGLLESQLSR	mir 27a method1
609.328	945.536	21	0.02	0	80	NTGLLESQLSR	mir 27a method1
609.328	1002.56	21	0.02	0	80	NTGLLESQLSR	mir 27a method1
620.313	697.297	22	0.01	0	80	KIPGFCEGGFK	mir 27a method1
620.313	844.366	22	0.01	0	80	KIPGFCEGGFK	mir 27a method1
620.313	901.387	22	0.01	0	80	KIPGFCEGGFK	mir 27a method1
626.836	527.294	22	0.01	0	80	NGLAAELGPASPR	mir 27a method1
626.836	697.399	22	0.01	0	80	NGLAAELGPASPR	mir 27a method1
626.836	826.442	22	0.01	0	80	NGLAAELGPASPR	mir 27a method1
626.836	897.479	22	0.01	0	80	NGLAAELGPASPR	mir 27a method1
637.82	673.363	22	0.01	0	80	NSLTGEEGQLAR	mir 27a method1
637.82	802.405	22	0.01	0	80	NSLTGEEGQLAR	mir 27a method1
637.82	859.427	22	0.01	0	80	NSLTGEEGQLAR	mir 27a method1
675.841	775.456	23	0.01	0	80	QASSDSDSILSLK	mir 27a method1
675.841	862.488	23	0.01	0	80	QASSDSDSILSLK	mir 27a method1
675.841	977.515	23	0.01	0	80	QASSDSDSILSLK	mir 27a method1
687.355	804.385	24	0.01	0	80	QLLQSQATEAER	mir 27a method1
687.355	891.417	24	0.01	0	80	QLLQSQATEAER	mir 27a method1
687.355	1019.48	24	0.01	0	80	QLLQSQATEAER	mir 27a method1
688.702	807.436	29	0.01	0	80	HSQFIGYPITLFVEKER	mir 27a method1
688.702	920.52	29	0.01	0	80	HSQFIGYPITLFVEKER	mir 27a method1
688.702	1021.57	29	0.01	0	80	HSQFIGYPITLFVEKER	mir 27a method1
688.702	1231.7	29	0.01	0	80	HSQFIGYPITLFVEKER	mir 27a method1
699.338	758.427	29	0.01	0	80	LAEAQSNSFSESSELGQRR	mir 27a method1
699.338	845.459	29	0.01	0	80	LAEAQSNSFSESSELGQRR	mir 27a method1
699.338	932.491	29	0.01	0	80	LAEAQSNSFSESSELGQRR	mir 27a method1
715.728	542.366	30	0.01	0	80	TPDVFSSSPLHLQPPPLGKK	mir 27a method1
715.728	639.419	30	0.01	0	80	TPDVFSSSPLHLQPPPLGKK	mir 27a method1
715.728	736.472	30	0.01	0	80	TPDVFSSSPLHLQPPPLGKK	mir 27a method1
715.728	864.53	30	0.01	0	80	TPDVFSSSPLHLQPPPLGKK	mir 27a method1
715.728	977.614	30	0.01	0	80	TPDVFSSSPLHLQPPPLGKK	mir 27a method1
715.728	1324.81	30	0.01	0	80	TPDVFSSSPLHLQPPPLGKK	mir 27a method1
715.871	802.405	24	0.01	0	80	RNSLTGEEGQLAR	mir 27a method1
715.871	859.427	24	0.01	0	80	RNSLTGEEGQLAR	mir 27a method1
715.871	960.474	24	0.01	0	80	RNSLTGEEGQLAR	mir 27a method1
720.339	769.336	30	0.02	0	80	TAFDEAIAELDTLNEESYK	mir 27a method1
720.339	882.42	30	0.02	0	80	TAFDEAIAELDTLNEESYK	mir 27a method1
720.339	983.468	30	0.02	0	80	TAFDEAIAELDTLNEESYK	mir 27a method1
720.339	1098.49	30	0.02	0	80	TAFDEAIAELDTLNEESYK	mir 27a method1
720.347	823.42	30	0.01	0	80	QTTVSNSQQAYQEAFEISK	mir 27a method1
720.347	951.478	30	0.01	0	80	QTTVSNSQQAYQEAFEISK	mir 27a method1
720.347	1114.54	30	0.01	0	80	QTTVSNSQQAYQEAFEISK	mir 27a method1
726.054	787.456	30	0.01	0	80	MNFANVFIGANPLAVDLLEK	mir 27a method1
726.054	900.54	30	0.01	0	80	MNFANVFIGANPLAVDLLEK	mir 27a method1
726.054	997.593	30	0.01	0	80	MNFANVFIGANPLAVDLLEK	mir 27a method1
727.386	525.314	25	0.01	0	80	ILNDLSSDAPGVPR	mir 27a method1
727.386	798.41	25	0.01	0	80	ILNDLSSDAPGVPR	mir 27a method1
727.386	885.442	25	0.01	0	80	ILNDLSSDAPGVPR	mir 27a method1
727.386	998.527	25	0.01	0	80	ILNDLSSDAPGVPR	mir 27a method1
729.889	831.468	25	0.01	0	80	WAIADAQSAIEKR	mir 27a method1
729.889	902.505	25	0.01	0	80	WAIADAQSAIEKR	mir 27a method1
729.889	1017.53	25	0.01	0	80	WAIADAQSAIEKR	mir 27a method1
737.88	487.251	25	0.01	0	80	LNSFIQVDAPDQK	mir 27a method1
737.88	772.384	25	0.01	0	80	LNSFIQVDAPDQK	mir 27a method1
737.88	900.442	25	0.01	0	80	LNSFIQVDAPDQK	mir 27a method1
737.88	1013.53	25	0.01	0	80	LNSFIQVDAPDQK	mir 27a method1
748.328	767.405	25	0.01	0	80	HTDDEMTGYVATR	mir 27a method1
748.328	898.445	25	0.01	0	80	HTDDEMTGYVATR	mir 27a method1
748.328	1027.49	25	0.01	0	80	HTDDEMTGYVATR	mir 27a method1
752.897	819.484	26	0.01	0	80	DQVANSAFVERLR	mir 27a method1
752.897	890.521	26	0.01	0	80	DQVANSAFVERLR	mir 27a method1
752.897	977.553	26	0.01	0	80	DQVANSAFVERLR	mir 27a method1
763.428	791.441	26	0.02	0	80	SIVHAVQAGIFVER	mir 27a method1
763.428	919.5	26	0.02	0	80	SIVHAVQAGIFVER	mir 27a method1
763.428	1018.57	26	0.02	0	80	SIVHAVQAGIFVER	mir 27a method1
763.428	1089.61	26	0.02	0	80	SIVHAVQAGIFVER	mir 27a method1
814.412	876.467	27	0.01	0	80	SPTGNTPPVIDSVSEK	mir 27a method1
814.412	973.52	27	0.01	0	80	SPTGNTPPVIDSVSEK	mir 27a method1
814.412	1070.57	27	0.01	0	80	SPTGNTPPVIDSVSEK	mir 27a method1
840.957	343.209	28	0.01	0	80	HENVIGLLDVFTPAR	mir 27a method1
840.957	918.504	28	0.01	0	80	HENVIGLLDVFTPAR	mir 27a method1
840.957	1031.59	28	0.01	0	80	HENVIGLLDVFTPAR	mir 27a method1
840.957	1088.61	28	0.01	0	80	HENVIGLLDVFTPAR	mir 27a method1
846.933	861.446	28	0.01	0	80	VFSGALQEALTEHYK	mir 27a method1
846.933	990.489	28	0.01	0	80	VFSGALQEALTEHYK	mir 27a method1
846.933	1118.55	28	0.01	0	80	VFSGALQEALTEHYK	mir 27a method1
882.957	966.468	29	0.01	0	80	ILFPGRDYIDQWNK	mir 27a method1
882.957	1081.49	29	0.01	0	80	ILFPGRDYIDQWNK	mir 27a method1
882.957	1237.6	29	0.01	0	80	ILFPGRDYIDQWNK	mir 27a method1
882.957	1294.62	29	0.01	0	80	ILFPGRDYIDQWNK	mir 27a method1
882.957	1391.67	29	0.01	0	80	ILFPGRDYIDQWNK	mir 27a method1
896.418	329.193	30	0.01	0	80	MQQVGGNSQTESSLPGR	mir 27a method1
896.418	974.49	30	0.01	0	80	MQQVGGNSQTESSLPGR	mir 27a method1
896.418	1061.52	30	0.01	0	80	MQQVGGNSQTESSLPGR	mir 27a method1
896.418	1175.57	30	0.01	0	80	MQQVGGNSQTESSLPGR	mir 27a method1
910.452	980.458	30	0.01	0	80	ELQIQVEHYEFQTR	mir 27a method1
910.452	1109.5	30	0.01	0	80	ELQIQVEHYEFQTR	mir 27a method1
910.452	1208.57	30	0.01	0	80	ELQIQVEHYEFQTR	mir 27a method1
936.772	945.391	38	0.01	0	80	LTLSGSDSVILGDTTTSGASDEEDGQPR	mir 27a method1
936.772	1032.42	38	0.01	0	80	LTLSGSDSVILGDTTTSGASDEEDGQPR	mir 27a method1
936.772	1103.46	38	0.01	0	80	LTLSGSDSVILGDTTTSGASDEEDGQPR	mir 27a method1
941.152	743.368	38	0.01	0	80	TAPTSTIAPGVVMASSPALPTQPAEEAAR	mir 27a method1
941.152	972.474	38	0.01	0	80	TAPTSTIAPGVVMASSPALPTQPAEEAAR	mir 27a method1
941.152	1069.53	38	0.01	0	80	TAPTSTIAPGVVMASSPALPTQPAEEAAR	mir 27a method1
941.152	1182.61	38	0.01	0	80	TAPTSTIAPGVVMASSPALPTQPAEEAAR	mir 27a method1
941.152	1350.7	38	0.01	0	80	TAPTSTIAPGVVMASSPALPTQPAEEAAR	mir 27a method1
954.025	946.561	32	0.01	0	80	KHSQFIGYPITLFVEK	mir 27a method1
954.025	1109.62	32	0.01	0	80	KHSQFIGYPITLFVEK	mir 27a method1
954.025	1166.65	32	0.01	0	80	KHSQFIGYPITLFVEK	mir 27a method1
954.025	1279.73	32	0.01	0	80	KHSQFIGYPITLFVEK	mir 27a method1
969.445	1009.46	32	0.01	0	80	ASLQSGQEGAGDSPGSQFSK	mir 27a method1
969.445	1080.5	32	0.01	0	80	ASLQSGQEGAGDSPGSQFSK	mir 27a method1
969.445	1137.52	32	0.01	0	80	ASLQSGQEGAGDSPGSQFSK	mir 27a method1
969.445	1266.56	32	0.01	0	80	ASLQSGQEGAGDSPGSQFSK	mir 27a method1
970.453	992.464	32	0.01	0	80	LAEAQSNSFSESSELGQR	mir 27a method1
970.453	1139.53	32	0.01	0	80	LAEAQSNSFSESSELGQR	mir 27a method1
970.453	1226.57	32	0.01	0	80	LAEAQSNSFSESSELGQR	mir 27a method1
988.806	428.273	40	0.01	0	80	LTLSGSDSVILGDTTTSGASDEEDGQPRR	mir 27a method1
988.806	1101.49	40	0.01	0	80	LTLSGSDSVILGDTTTSGASDEEDGQPRR	mir 27a method1
988.806	1188.52	40	0.01	0	80	LTLSGSDSVILGDTTTSGASDEEDGQPRR	mir 27a method1
988.806	1259.56	40	0.01	0	80	LTLSGSDSVILGDTTTSGASDEEDGQPRR	mir 27a method1
996.798	1065.51	40	0.02	0	80	LFSGTQISTIAESEDSQESVDSVTDSQK	mir 27a method1
996.798	1194.55	40	0.02	0	80	LFSGTQISTIAESEDSQESVDSVTDSQK	mir 27a method1
996.798	1322.61	40	0.02	0	80	LFSGTQISTIAESEDSQESVDSVTDSQK	mir 27a method1
996.798	1409.64	40	0.02	0	80	LFSGTQISTIAESEDSQESVDSVTDSQK	mir 27a method1
488.265	531.325	18	0.02	6	26	SSAAQLTAAR	mir 27a method1
488.265	659.383	18	0.02	6	26	SSAAQLTAAR	mir 27a method1
488.265	730.421	18	0.02	6	26	SSAAQLTAAR	mir 27a method1
488.265	801.458	18	0.02	6	26	SSAAQLTAAR	mir 27a method1
519.77	553.321	19	0.02	10	30	ALGDELHQR	mir 27a method1
519.77	682.363	19	0.02	10	30	ALGDELHQR	mir 27a method1
519.77	797.39	19	0.02	10	30	ALGDELHQR	mir 27a method1
519.77	854.412	19	0.02	10	30	ALGDELHQR	mir 27a method1
640.359	682.363	22	0.02	11	31	LKALGDELHQR	mir 27a method1
640.359	797.39	22	0.02	11	31	LKALGDELHQR	mir 27a method1
640.359	854.412	22	0.02	11	31	LKALGDELHQR	mir 27a method1
640.359	967.496	22	0.02	11	31	LKALGDELHQR	mir 27a method1
886.918	900.453	30	0.02	11	31	IPESETESTASAPNSPR	mir 27a method1
886.918	987.485	30	0.02	11	31	IPESETESTASAPNSPR	mir 27a method1
886.918	1116.53	30	0.02	11	31	IPESETESTASAPNSPR	mir 27a method1
886.918	1217.58	30	0.02	11	31	IPESETESTASAPNSPR	mir 27a method1
618.304	708.368	22	0.02	16	36	DQVANSAFVER	mir 27a method1
618.304	822.41	22	0.02	16	36	DQVANSAFVER	mir 27a method1
620.313	998.44	22	0.02	16	36	KIPGFCEGGFK	mir 27a method1
586.81	668.36	23	0.02	20	40	SAAGAFGPELSR[HeavyR]	mir 27a method1
586.811	815.428	23	0.02	20	40	SAAGAFGPELSR[HeavyR]	mir 27a method1
679.655	703.352	28	0.02	22	42	LCDASFSSPAVAQAHYQGK	mir 27a method1
679.655	831.411	28	0.02	22	42	LCDASFSSPAVAQAHYQGK	mir 27a method1
679.655	902.448	28	0.02	22	42	LCDASFSSPAVAQAHYQGK	mir 27a method1
679.655	1001.52	28	0.02	22	42	LCDASFSSPAVAQAHYQGK	mir 27a method1
679.655	1169.61	28	0.02	22	42	LCDASFSSPAVAQAHYQGK	mir 27a method1
649.857	743.441	22	0.02	25	45	NNLVDIIQQNK	mir 27a method1
649.857	858.468	22	0.02	25	45	NNLVDIIQQNK	mir 27a method1
649.857	957.536	22	0.02	25	45	NNLVDIIQQNK	mir 27a method1
649.857	1070.62	22	0.02	25	45	NNLVDIIQQNK	mir 27a method1
763.045	822.472	31	0.02	25	45	QTTVSNSQQAYQEAFEISKK	mir 27a method1
763.045	951.515	31	0.02	25	45	QTTVSNSQQAYQEAFEISKK	mir 27a method1
763.045	1079.57	31	0.02	25	45	QTTVSNSQQAYQEAFEISKK	mir 27a method1
763.045	1242.64	31	0.02	25	45	QTTVSNSQQAYQEAFEISKK	mir 27a method1
687.38	761.404	24	0.02	26	46	SLLLADLDKEEK	mir 27a method1
687.38	876.431	24	0.02	26	46	SLLLADLDKEEK	mir 27a method1
687.38	947.468	24	0.02	26	46	SLLLADLDKEEK	mir 27a method1
687.38	1060.55	24	0.02	26	46	SLLLADLDKEEK	mir 27a method1
765.36	817.369	26	0.02	26	46	FEIPEPEPTEADR	mir 27a method1
765.36	914.421	26	0.02	26	46	FEIPEPEPTEADR	mir 27a method1
765.36	1043.46	26	0.02	26	46	FEIPEPEPTEADR	mir 27a method1
765.36	1140.52	26	0.02	26	46	FEIPEPEPTEADR	mir 27a method1
651.838	675.367	23	0.02	28	48	WAIADAQSAIEK	mir 27a method1
651.838	746.404	23	0.02	28	48	WAIADAQSAIEK	mir 27a method1
651.838	861.431	23	0.02	28	48	WAIADAQSAIEK	mir 27a method1
651.838	932.468	23	0.02	28	48	WAIADAQSAIEK	mir 27a method1
729.915	315.203	25	0.02	28	48	DLLSKMLVIDPAK	mir 27a method1
729.915	755.466	25	0.02	28	48	DLLSKMLVIDPAK	mir 27a method1
729.915	902.502	25	0.02	28	48	DLLSKMLVIDPAK	mir 27a method1
729.915	1030.6	25	0.02	28	48	DLLSKMLVIDPAK	mir 27a method1
729.915	1117.63	25	0.02	28	48	DLLSKMLVIDPAK	mir 27a method1
917.394	935.415	30	0.02	28	48	NPDDITNEEYGEFYK	mir 27a method1
917.394	1064.46	30	0.02	28	48	NPDDITNEEYGEFYK	mir 27a method1
917.394	1178.5	30	0.02	28	48	NPDDITNEEYGEFYK	mir 27a method1
917.394	1279.55	30	0.02	28	48	NPDDITNEEYGEFYK	mir 27a method1
632.801	718.337	22	0.02	30	50	FNVWDVGGQDK	mir 27a method1
632.801	904.416	22	0.02	30	50	FNVWDVGGQDK	mir 27a method1
632.801	1003.48	22	0.02	30	50	FNVWDVGGQDK	mir 27a method1
632.801	1117.53	22	0.02	30	50	FNVWDVGGQDK	mir 27a method1
558.325	719.371	22	0.02	30	60	GLILVGGYGTR[HeavyR]	mir 27a method1
558.326	620.302	22	0.02	30	60	GLILVGGYGTR[HeavyR]	mir 27a method1
752.07	839.451	31	0.02	31	51	LGQSVTTIPTVGFNVETVTYK	mir 27a method1
752.07	953.494	31	0.02	31	51	LGQSVTTIPTVGFNVETVTYK	mir 27a method1
752.07	1100.56	31	0.02	31	51	LGQSVTTIPTVGFNVETVTYK	mir 27a method1
752.07	1157.58	31	0.02	31	51	LGQSVTTIPTVGFNVETVTYK	mir 27a method1
673.03	608.377	28	0.02	35	55	TPDVFSSSPLHLQPPPLGK	mir 27a method1
673.03	736.435	28	0.02	35	55	TPDVFSSSPLHLQPPPLGK	mir 27a method1
673.03	849.519	28	0.02	35	55	TPDVFSSSPLHLQPPPLGK	mir 27a method1
673.03	986.578	28	0.02	35	55	TPDVFSSSPLHLQPPPLGK	mir 27a method1
673.03	1196.71	28	0.02	35	55	TPDVFSSSPLHLQPPPLGK	mir 27a method1
889.977	946.561	30	0.02	40	60	HSQFIGYPITLFVEK	mir 27a method1
889.977	1109.62	30	0.02	40	60	HSQFIGYPITLFVEK	mir 27a method1
889.977	1166.65	30	0.02	40	60	HSQFIGYPITLFVEK	mir 27a method1
889.977	1279.73	30	0.02	40	60	HSQFIGYPITLFVEK	mir 27a method1
559.334	931.598	20	0.02	40	65	DAIILIFANK	mir 27a method1
559.334	592.345	20	0.02	40	65	DAIILIFANK	mir 27a method1
559.334	705.429	20	0.02	40	65	DAIILIFANK	mir 27a method1
559.334	818.513	20	0.02	40	65	DAIILIFANK	mir 27a method1
937.512	1065.65	31	0.02	40	80	LTDDHVQFLIYQILR	mir 27a method1
937.512	1193.7	31	0.02	40	80	LTDDHVQFLIYQILR	mir 27a method1
937.512	1292.77	31	0.02	40	80	LTDDHVQFLIYQILR	mir 27a method1
937.512	1429.83	31	0.02	40	80	LTDDHVQFLIYQILR	mir 27a method1
686.013	796.384	28	0.04	52	80	NIEYAASVLEAVYIDETR	mir 27a method1
686.013	895.452	28	0.04	52	80	NIEYAASVLEAVYIDETR	mir 27a method1
686.013	966.489	28	0.04	52	80	NIEYAASVLEAVYIDETR	mir 27a method1
686.013	1095.53	28	0.04	52	80	NIEYAASVLEAVYIDETR	mir 27a method1
433.716	489.267	16	0.02	0	25	VDYDQVK	mir 27a method2
433.716	652.33	16	0.02	0	25	VDYDQVK	mir 27a method2
433.716	767.357	16	0.02	0	25	VDYDQVK	mir 27a method2
368.68	452.225	14	0.02	0	30	HFYNR	mir 27a method2
368.68	599.294	14	0.02	0	30	HFYNR	mir 27a method2
596.314	689.383	21	0.02	0	30	SNTISTVDLNK	mir 27a method2
596.314	776.415	21	0.02	0	30	SNTISTVDLNK	mir 27a method2
596.314	889.499	21	0.02	0	30	SNTISTVDLNK	mir 27a method2
596.314	990.547	21	0.02	0	30	SNTISTVDLNK	mir 27a method2
833.942	857.484	28	0.02	0	30	HHLNNPPPSQVGLTR	mir 27a method2
833.942	954.537	28	0.02	0	30	HHLNNPPPSQVGLTR	mir 27a method2
833.942	1051.59	28	0.02	0	30	HHLNNPPPSQVGLTR	mir 27a method2
833.942	1165.63	28	0.02	0	30	HHLNNPPPSQVGLTR	mir 27a method2
446.73	608.326	16	0.02	0	35	HFYNRR	mir 27a method2
446.73	755.395	16	0.02	0	35	HFYNRR	mir 27a method2
911.993	916.532	30	0.02	0	35	HHLNNPPPSQVGLTRR	mir 27a method2
911.993	1013.59	30	0.02	0	35	HHLNNPPPSQVGLTRR	mir 27a method2
911.993	1110.64	30	0.02	0	35	HHLNNPPPSQVGLTRR	mir 27a method2
911.993	1207.69	30	0.02	0	35	HHLNNPPPSQVGLTRR	mir 27a method2
613.315	854.445	24	0.02	0	40	GISNEGQNASIK[HeavyK]	mir 27a method2
613.316	725.403	24	0.02	0	40	GISNEGQNASIK[HeavyK]	mir 27a method2
493.768	573.338	20	0.02	0	80	SSAAPPPPPR[HeavyR]	mir 27a method2
493.769	670.391	20	0.02	0	80	SSAAPPPPPR[HeavyR]	mir 27a method2
496.762	511.299	18	0.02	0	80	APSPEPAAPR	mir 27a method2
496.762	640.341	18	0.02	0	80	APSPEPAAPR	mir 27a method2
496.762	737.394	18	0.02	0	80	APSPEPAAPR	mir 27a method2
496.762	824.426	18	0.02	0	80	APSPEPAAPR	mir 27a method2
496.762	921.479	18	0.02	0	80	APSPEPAAPR	mir 27a method2
665.83	728.398	23	0.02	0	80	LSEDGTYTGFIK	mir 27a method2
665.83	829.445	23	0.02	0	80	LSEDGTYTGFIK	mir 27a method2
665.83	886.467	23	0.02	0	80	LSEDGTYTGFIK	mir 27a method2
665.83	1001.49	23	0.02	0	80	LSEDGTYTGFIK	mir 27a method2
674.707	759.415	28	0.02	0	80	ATFYAAEIILGLQFLHSK	mir 27a method2
674.707	872.499	28	0.02	0	80	ATFYAAEIILGLQFLHSK	mir 27a method2
674.707	929.52	28	0.02	0	80	ATFYAAEIILGLQFLHSK	mir 27a method2
674.707	1042.6	28	0.02	0	80	ATFYAAEIILGLQFLHSK	mir 27a method2
718.332	777.362	30	0.02	0	80	LGQYGFPNPEWSEVSEDAK	mir 27a method2
718.332	864.395	30	0.02	0	80	LGQYGFPNPEWSEVSEDAK	mir 27a method2
718.332	1050.47	30	0.02	0	80	LGQYGFPNPEWSEVSEDAK	mir 27a method2
718.332	1179.52	30	0.02	0	80	LGQYGFPNPEWSEVSEDAK	mir 27a method2
718.332	1276.57	30	0.02	0	80	LGQYGFPNPEWSEVSEDAK	mir 27a method2
834.397	915.388	34	0.02	0	80	WLGVEGDQLPPGHTVSQYETCK	mir 27a method2
834.397	1014.46	34	0.02	0	80	WLGVEGDQLPPGHTVSQYETCK	mir 27a method2
834.397	1115.5	34	0.02	0	80	WLGVEGDQLPPGHTVSQYETCK	mir 27a method2
834.397	1252.56	34	0.02	0	80	WLGVEGDQLPPGHTVSQYETCK	mir 27a method2
834.397	1406.64	34	0.02	0	80	WLGVEGDQLPPGHTVSQYETCK	mir 27a method2
965.506	971.492	32	0.02	0	80	DIGTAIQFLHSHNIAHR	mir 27a method2
965.506	1084.58	32	0.02	0	80	DIGTAIQFLHSHNIAHR	mir 27a method2
965.506	1231.64	32	0.02	0	80	DIGTAIQFLHSHNIAHR	mir 27a method2
965.506	1359.7	32	0.02	0	80	DIGTAIQFLHSHNIAHR	mir 27a method2
1104.25	0 913.441	44	0.02	0	80	IGLSSQELFRLLPSELTLWVDPYEVSYR	mir 27a method2
1104.25	0 1127.537	44	0.02	0	80	IGLSSQELFRLLPSELTLWVDPYEVSYR	mir 27a method2
1104.25	0 1313.616	44	0.02	0	80	IGLSSQELFRLLPSELTLWVDPYEVSYR	mir 27a method2
1104.25	0 1426.700	44	0.02	0	80	IGLSSQELFRLLPSELTLWVDPYEVSYR	mir 27a method2
488.265	531.325	18	0.02	6	26	SSAAQLTAAR	mir 27a method2
488.265	659.383	18	0.02	6	26	SSAAQLTAAR	mir 27a method2
488.265	730.421	18	0.02	6	26	SSAAQLTAAR	mir 27a method2
488.265	801.458	18	0.02	6	26	SSAAQLTAAR	mir 27a method2
608.854	659.42	21	0.02	6	26	SSAAQLTAARLK	mir 27a method2
608.854	772.504	21	0.02	6	26	SSAAQLTAARLK	mir 27a method2
608.854	900.563	21	0.02	6	26	SSAAQLTAARLK	mir 27a method2
608.854	971.6	21	0.02	6	26	SSAAQLTAARLK	mir 27a method2
519.77	553.321	19	0.02	10	30	ALGDELHQR	mir 27a method2
519.77	682.363	19	0.02	10	30	ALGDELHQR	mir 27a method2
519.77	797.39	19	0.02	10	30	ALGDELHQR	mir 27a method2
519.77	854.412	19	0.02	10	30	ALGDELHQR	mir 27a method2
562.303	593.366	20	0.02	10	30	KGTDELYAVK	mir 27a method2
562.303	722.408	20	0.02	10	30	KGTDELYAVK	mir 27a method2
562.303	837.435	20	0.02	10	30	KGTDELYAVK	mir 27a method2
562.303	938.483	20	0.02	10	30	KGTDELYAVK	mir 27a method2
602.281	612.3	21	0.02	10	30	SFEDIHHYR	mir 27a method2
602.281	725.384	21	0.02	10	30	SFEDIHHYR	mir 27a method2
602.281	840.411	21	0.02	10	30	SFEDIHHYR	mir 27a method2
602.281	969.454	21	0.02	10	30	SFEDIHHYR	mir 27a method2
640.359	682.363	22	0.02	11	31	LKALGDELHQR	mir 27a method2
640.359	797.39	22	0.02	11	31	LKALGDELHQR	mir 27a method2
640.359	854.412	22	0.02	11	31	LKALGDELHQR	mir 27a method2
640.359	967.496	22	0.02	11	31	LKALGDELHQR	mir 27a method2
627.333	673.399	22	0.02	13	55	NIHESVSAQIR	mir 27a method2
627.333	760.431	22	0.02	13	55	NIHESVSAQIR	mir 27a method2
627.333	889.474	22	0.02	13	55	NIHESVSAQIR	mir 27a method2
627.333	1026.53	22	0.02	13	55	NIHESVSAQIR	mir 27a method2
691.381	702.426	24	0.02	13	55	NIHESVSAQIRK	mir 27a method2
691.381	801.494	24	0.02	13	55	NIHESVSAQIRK	mir 27a method2
691.381	888.526	24	0.02	13	55	NIHESVSAQIRK	mir 27a method2
691.381	1017.57	24	0.02	13	55	NIHESVSAQIRK	mir 27a method2
676.875	740.441	23	0.02	14	34	VQTHFIHTLTR	mir 27a method2
676.875	887.51	23	0.02	14	34	VQTHFIHTLTR	mir 27a method2
676.875	1024.57	23	0.02	14	34	VQTHFIHTLTR	mir 27a method2
676.875	1125.62	23	0.02	14	34	VQTHFIHTLTR	mir 27a method2
559.791	624.321	20	0.02	15	35	TFFVHTPNR	mir 27a method2
559.791	723.39	20	0.02	15	35	TFFVHTPNR	mir 27a method2
559.791	870.458	20	0.02	15	35	TFFVHTPNR	mir 27a method2
559.791	1017.53	20	0.02	15	35	TFFVHTPNR	mir 27a method2
520.298	598.392	19	0.02	16	36	NNVGGLLGPAK	mir 27a method2
520.298	655.414	19	0.02	16	36	NNVGGLLGPAK	mir 27a method2
520.298	712.435	19	0.02	16	36	NNVGGLLGPAK	mir 27a method2
520.298	811.504	19	0.02	16	36	NNVGGLLGPAK	mir 27a method2
596.814	617.325	21	0.02	16	36	VDYVVVDQQK	mir 27a method2
596.814	716.394	21	0.02	16	36	VDYVVVDQQK	mir 27a method2
596.814	815.462	21	0.02	16	36	VDYVVVDQQK	mir 27a method2
596.814	978.525	21	0.02	16	36	VDYVVVDQQK	mir 27a method2
598.349	471.304	21	0.01	16	36	NNVGGLLGPAKR	mir 27a method2
598.349	641.409	21	0.01	16	36	NNVGGLLGPAKR	mir 27a method2
598.349	754.493	21	0.01	16	36	NNVGGLLGPAKR	mir 27a method2
598.349	811.515	21	0.01	16	36	NNVGGLLGPAKR	mir 27a method2
598.349	868.536	21	0.01	16	36	NNVGGLLGPAKR	mir 27a method2
776.848	886.318	26	0.02	18	38	APQTGIVDECCFR	mir 27a method2
776.848	985.387	26	0.02	18	38	APQTGIVDECCFR	mir 27a method2
776.848	1098.47	26	0.02	18	38	APQTGIVDECCFR	mir 27a method2
776.848	1155.49	26	0.02	18	38	APQTGIVDECCFR	mir 27a method2
586.81	668.36	23	0.02	20	40	SAAGAFGPELSR[HeavyR]	mir 27a method2
586.811	815.428	23	0.02	20	40	SAAGAFGPELSR[HeavyR]	mir 27a method2
673.341	674.383	23	0.02	20	50	EINWEELERK	mir 27a method2
673.341	803.426	23	0.02	20	50	EINWEELERK	mir 27a method2
673.341	989.505	23	0.02	20	50	EINWEELERK	mir 27a method2
673.341	1103.55	23	0.02	20	50	EINWEELERK	mir 27a method2
583.29	609.288	20	0.02	21	41	SQLDISDPYK	mir 27a method2
583.29	722.372	20	0.02	21	41	SQLDISDPYK	mir 27a method2
583.29	837.399	20	0.02	21	41	SQLDISDPYK	mir 27a method2
583.29	950.483	20	0.02	21	41	SQLDISDPYK	mir 27a method2
666.904	569.377	23	0.02	22	42	LITAHVEPLLAR	mir 27a method2
666.904	698.42	23	0.02	22	42	LITAHVEPLLAR	mir 27a method2
666.904	797.488	23	0.02	22	42	LITAHVEPLLAR	mir 27a method2
666.904	934.547	23	0.02	22	42	LITAHVEPLLAR	mir 27a method2
429.264	488.319	16	0.02	23	43	NAIASILR	mir 27a method2
429.264	559.356	16	0.02	23	43	NAIASILR	mir 27a method2
429.264	672.44	16	0.02	23	43	NAIASILR	mir 27a method2
429.264	743.477	16	0.02	23	43	NAIASILR	mir 27a method2
575.791	660.331	20	0.02	23	43	LTFEQDIER	mir 27a method2
575.791	789.374	20	0.02	23	43	LTFEQDIER	mir 27a method2
575.791	936.442	20	0.02	23	43	LTFEQDIER	mir 27a method2
575.791	1037.49	20	0.02	23	43	LTFEQDIER	mir 27a method2
711.907	385.256	24	0.02	24	44	SVSAPQQIINPIR	mir 27a method2
711.907	725.467	24	0.02	24	44	SVSAPQQIINPIR	mir 27a method2
711.907	853.525	24	0.02	24	44	SVSAPQQIINPIR	mir 27a method2
711.907	981.584	24	0.02	24	44	SVSAPQQIINPIR	mir 27a method2
711.907	1078.64	24	0.02	24	44	SVSAPQQIINPIR	mir 27a method2
789.957	541.357	27	0.02	24	44	SVSAPQQIINPIRR	mir 27a method2
789.957	881.568	27	0.02	24	44	SVSAPQQIINPIRR	mir 27a method2
789.957	1009.63	27	0.02	24	44	SVSAPQQIINPIRR	mir 27a method2
789.957	1137.68	27	0.02	24	44	SVSAPQQIINPIRR	mir 27a method2
789.957	1234.74	27	0.02	24	44	SVSAPQQIINPIRR	mir 27a method2
806.383	838.373	27	0.02	24	44	HVVQFYHYFEDK	mir 27a method2
806.383	1001.44	27	0.02	24	44	HVVQFYHYFEDK	mir 27a method2
806.383	1148.51	27	0.02	24	44	HVVQFYHYFEDK	mir 27a method2
806.383	1276.56	27	0.02	24	44	HVVQFYHYFEDK	mir 27a method2
711.391	739.373	24	0.02	25	45	AIVSALQSNSIYR	mir 27a method2
711.391	867.432	24	0.02	25	45	AIVSALQSNSIYR	mir 27a method2
711.391	980.516	24	0.02	25	45	AIVSALQSNSIYR	mir 27a method2
711.391	1051.55	24	0.02	25	45	AIVSALQSNSIYR	mir 27a method2
831.981	893.52	28	0.02	25	45	AIVSALQSNSIYRLK	mir 27a method2
831.981	980.552	28	0.02	25	45	AIVSALQSNSIYRLK	mir 27a method2
831.981	1108.61	28	0.02	25	45	AIVSALQSNSIYRLK	mir 27a method2
831.981	1221.69	28	0.02	25	45	AIVSALQSNSIYRLK	mir 27a method2
609.827	679.341	21	0.02	27	47	AQNLLEQFQK	mir 27a method2
609.827	792.425	21	0.02	27	47	AQNLLEQFQK	mir 27a method2
609.827	905.509	21	0.02	27	47	AQNLLEQFQK	mir 27a method2
609.827	1019.55	21	0.02	27	47	AQNLLEQFQK	mir 27a method2
619.288	645.357	22	0.02	28	48	SNDFEELVER	mir 27a method2
619.288	774.399	22	0.02	28	48	SNDFEELVER	mir 27a method2
619.288	921.468	22	0.02	28	48	SNDFEELVER	mir 27a method2
627.333	1026.53	22	0.02	28	48	NIHESVSAQIR	mir 27a method2
697.007	766.315	29	0.02	28	48	EILLEMIHSIQNSQDMR	mir 27a method2
697.007	894.373	29	0.02	28	48	EILLEMIHSIQNSQDMR	mir 27a method2
697.007	1007.46	29	0.02	28	48	EILLEMIHSIQNSQDMR	mir 27a method2
697.007	1094.49	29	0.02	28	48	EILLEMIHSIQNSQDMR	mir 27a method2
575.317	692.373	20	0.02	30	50	IGLSSQELFR	mir 27a method2
575.317	779.405	20	0.02	30	50	IGLSSQELFR	mir 27a method2
575.317	866.437	20	0.02	30	50	IGLSSQELFR	mir 27a method2
575.317	979.521	20	0.02	30	50	IGLSSQELFR	mir 27a method2
609.293	675.331	21	0.02	30	50	EINWEELER	mir 27a method2
609.293	861.41	21	0.02	30	50	EINWEELER	mir 27a method2
609.293	975.453	21	0.02	30	50	EINWEELER	mir 27a method2
609.293	1088.54	21	0.02	30	50	EINWEELER	mir 27a method2
661.702	751.446	27	0.02	30	50	TPLSTGGTLAFVSPSLAVHK	mir 27a method2
661.702	838.478	27	0.02	30	50	TPLSTGGTLAFVSPSLAVHK	mir 27a method2
661.702	937.547	27	0.02	30	50	TPLSTGGTLAFVSPSLAVHK	mir 27a method2
661.702	1084.62	27	0.02	30	50	TPLSTGGTLAFVSPSLAVHK	mir 27a method2
666.904	1005.58	23	0.02	30	50	LITAHVEPLLAR	mir 27a method2
706.851	814.435	24	0.02	30	50	LTGDPDVLEYYK	mir 27a method2
706.851	929.461	24	0.02	30	50	LTGDPDVLEYYK	mir 27a method2
706.851	1026.51	24	0.02	30	50	LTGDPDVLEYYK	mir 27a method2
760.078	535.324	31	0.02	30	50	INSQLVAQQVAQQYATPPPPK	mir 27a method2
760.078	870.472	31	0.02	30	50	INSQLVAQQVAQQYATPPPPK	mir 27a method2
760.078	998.531	31	0.02	30	50	INSQLVAQQVAQQYATPPPPK	mir 27a method2
760.078	1197.63	31	0.02	30	50	INSQLVAQQVAQQYATPPPPK	mir 27a method2
802.776	372.261	33	0.02	30	50	INSQLVAQQVAQQYATPPPPKK	mir 27a method2
802.776	835.504	33	0.02	30	50	INSQLVAQQVAQQYATPPPPKK	mir 27a method2
802.776	998.567	33	0.02	30	50	INSQLVAQQVAQQYATPPPPKK	mir 27a method2
802.776	1126.63	33	0.02	30	50	INSQLVAQQVAQQYATPPPPKK	mir 27a method2
802.776	1254.68	33	0.02	30	50	INSQLVAQQVAQQYATPPPPKK	mir 27a method2
719.853	791.408	25	0.02	31	51	GAEVSFGCGVLASGK	mir 27a method2
719.853	848.429	25	0.02	31	51	GAEVSFGCGVLASGK	mir 27a method2
719.853	995.498	25	0.02	31	51	GAEVSFGCGVLASGK	mir 27a method2
719.853	1082.53	25	0.02	31	51	GAEVSFGCGVLASGK	mir 27a method2
727.37	808.435	25	0.02	32	52	EQLSTSFQWVTK	mir 27a method2
727.37	895.467	25	0.02	32	52	EQLSTSFQWVTK	mir 27a method2
727.37	996.515	25	0.02	32	52	EQLSTSFQWVTK	mir 27a method2
727.37	1083.55	25	0.02	32	52	EQLSTSFQWVTK	mir 27a method2
700.377	457.277	29	0.02	35	55	QLLLTEGPHLYYVDPVNK	mir 27a method2
700.377	834.436	29	0.02	35	55	QLLLTEGPHLYYVDPVNK	mir 27a method2
700.377	997.499	29	0.02	35	55	QLLLTEGPHLYYVDPVNK	mir 27a method2
700.377	1110.58	29	0.02	35	55	QLLLTEGPHLYYVDPVNK	mir 27a method2
713.401	358.208	24	0.02	35	60	DLIQGLLTVDPNK	mir 27a method2
713.401	786.436	24	0.02	35	60	DLIQGLLTVDPNK	mir 27a method2
713.401	899.52	24	0.02	35	60	DLIQGLLTVDPNK	mir 27a method2
713.401	956.541	24	0.02	35	60	DLIQGLLTVDPNK	mir 27a method2
713.401	1084.6	24	0.02	35	60	DLIQGLLTVDPNK	mir 27a method2
791.452	514.31	27	0.02	35	60	DLIQGLLTVDPNKR	mir 27a method2
791.452	829.453	27	0.02	35	60	DLIQGLLTVDPNKR	mir 27a method2
791.452	942.537	27	0.02	35	60	DLIQGLLTVDPNKR	mir 27a method2
791.452	1055.62	27	0.02	35	60	DLIQGLLTVDPNKR	mir 27a method2
791.452	1112.64	27	0.02	35	60	DLIQGLLTVDPNKR	mir 27a method2
664.875	773.415	23	0.02	36	56	LLESLDQLELR	mir 27a method2
664.875	886.499	23	0.02	36	56	LLESLDQLELR	mir 27a method2
664.875	973.531	23	0.02	36	56	LLESLDQLELR	mir 27a method2
664.875	1102.57	23	0.02	36	56	LLESLDQLELR	mir 27a method2
890.454	916.499	30	0.02	36	56	ETLGTGAFSEVVLAEEK	mir 27a method2
890.454	1003.53	30	0.02	36	56	ETLGTGAFSEVVLAEEK	mir 27a method2
890.454	1150.6	30	0.02	36	56	ETLGTGAFSEVVLAEEK	mir 27a method2
890.454	1221.64	30	0.02	36	56	ETLGTGAFSEVVLAEEK	mir 27a method2
580.837	615.382	20	0.02	38	58	DLIGFGLQVAK	mir 27a method2
580.837	762.451	20	0.02	38	58	DLIGFGLQVAK	mir 27a method2
580.837	819.472	20	0.02	38	58	DLIGFGLQVAK	mir 27a method2
580.837	932.556	20	0.02	38	58	DLIGFGLQVAK	mir 27a method2
634.35	656.398	22	0.02	38	58	TSFYLPLDAIK	mir 27a method2
634.35	769.482	22	0.02	38	58	TSFYLPLDAIK	mir 27a method2
634.35	932.545	22	0.02	38	58	TSFYLPLDAIK	mir 27a method2
634.35	1079.61	22	0.02	38	58	TSFYLPLDAIK	mir 27a method2
689.025	714.451	29	0.02	38	58	QAGGNPWHQFVENNLILK	mir 27a method2
689.025	843.493	29	0.02	38	58	QAGGNPWHQFVENNLILK	mir 27a method2
689.025	942.562	29	0.02	38	58	QAGGNPWHQFVENNLILK	mir 27a method2
689.025	1089.63	29	0.02	38	58	QAGGNPWHQFVENNLILK	mir 27a method2
670.683	753.378	28	0.02	40	60	QSPFLVTLHYAFQTETK	mir 27a method2
670.683	824.415	28	0.02	40	60	QSPFLVTLHYAFQTETK	mir 27a method2
670.683	987.478	28	0.02	40	60	QSPFLVTLHYAFQTETK	mir 27a method2
670.683	1124.54	28	0.02	40	60	QSPFLVTLHYAFQTETK	mir 27a method2
723.375	799.431	25	0.02	40	60	AEFWLDLQPQAK	mir 27a method2
723.375	912.515	25	0.02	40	60	AEFWLDLQPQAK	mir 27a method2
723.375	1098.59	25	0.02	40	60	AEFWLDLQPQAK	mir 27a method2
723.375	1245.66	25	0.02	40	60	AEFWLDLQPQAK	mir 27a method2
721.708	760.399	30	0.02	42	62	QLQTFSQSLQELLAEHYK	mir 27a method2
721.708	873.483	30	0.02	42	62	QLQTFSQSLQELLAEHYK	mir 27a method2
721.708	1002.52	30	0.02	42	62	QLQTFSQSLQELLAEHYK	mir 27a method2
721.708	1130.58	30	0.02	42	62	QLQTFSQSLQELLAEHYK	mir 27a method2
538.829	574.335	19	0.02	46	66	LYLLQWLK	mir 27a method2
538.829	687.419	19	0.02	46	66	LYLLQWLK	mir 27a method2
538.829	800.503	19	0.02	46	66	LYLLQWLK	mir 27a method2
538.829	963.566	19	0.02	46	66	LYLLQWLK	mir 27a method2
685.388	770.513	28	0.04	50	80	QLHISSTTTVSEVIQGLLK	mir 27a method2
685.388	899.556	28	0.04	50	80	QLHISSTTTVSEVIQGLLK	mir 27a method2
685.388	986.588	28	0.04	50	80	QLHISSTTTVSEVIQGLLK	mir 27a method2
685.388	1085.66	28	0.04	50	80	QLHISSTTTVSEVIQGLLK	mir 27a method2
858.972	874.54	29	0.03	50	80	LFQGYSFVAPSILFK	mir 27a method2
858.972	1021.61	29	0.03	50	80	LFQGYSFVAPSILFK	mir 27a method2
858.972	1108.64	29	0.03	50	80	LFQGYSFVAPSILFK	mir 27a method2
858.972	1271.7	29	0.03	50	80	LFQGYSFVAPSILFK	mir 27a method2
393.763	416.298	15	0.015	0	20	LGSLLKR	mir 29c
393.763	529.382	15	0.015	0	20	LGSLLKR	mir 29c
393.763	616.414	15	0.015	0	20	LGSLLKR	mir 29c
393.763	673.436	15	0.015	0	20	LGSLLKR	mir 29c
398.719	460.277	15	0.015	0	20	QAHELAK	mir 29c
398.719	597.335	15	0.015	0	20	QAHELAK	mir 29c
398.719	668.373	15	0.015	0	20	QAHELAK	mir 29c
430.74	434.261	16	0.015	0	20	EISPSVTK	mir 29c
430.74	531.314	16	0.015	0	20	EISPSVTK	mir 29c
430.74	618.346	16	0.015	0	20	EISPSVTK	mir 29c
430.74	731.43	16	0.015	0	20	EISPSVTK	mir 29c
498.243	566.257	18	0.015	0	20	ITQSEFDR	mir 29c
498.243	653.289	18	0.015	0	20	ITQSEFDR	mir 29c
498.243	781.348	18	0.015	0	20	ITQSEFDR	mir 29c
498.243	882.395	18	0.015	0	20	ITQSEFDR	mir 29c
508.293	556.345	18	0.015	0	20	SAVTTVVNPK	mir 29c
508.293	657.393	18	0.015	0	20	SAVTTVVNPK	mir 29c
508.293	758.441	18	0.015	0	20	SAVTTVVNPK	mir 29c
508.293	857.509	18	0.015	0	20	SAVTTVVNPK	mir 29c
549.783	565.309	19	0.015	0	20	SFADINLYR	mir 29c
549.783	678.393	19	0.015	0	20	SFADINLYR	mir 29c
549.783	793.42	19	0.015	0	20	SFADINLYR	mir 29c
549.783	864.457	19	0.015	0	20	SFADINLYR	mir 29c
570.762	696.356	20	0.015	0	20	DNTNEIYSGK	mir 29c
570.762	810.399	20	0.015	0	20	DNTNEIYSGK	mir 29c
570.762	911.447	20	0.015	0	20	DNTNEIYSGK	mir 29c
629.307	706.373	22	0.015	0	20	DEVAHTLTESR	mir 29c
629.307	843.432	22	0.015	0	20	DEVAHTLTESR	mir 29c
629.307	914.469	22	0.015	0	20	DEVAHTLTESR	mir 29c
629.307	1013.54	22	0.015	0	20	DEVAHTLTESR	mir 29c
424.221	488.319	16	0.015	0	23	MDPIISR	mir 29c
424.221	585.372	16	0.015	0	23	MDPIISR	mir 29c
424.221	700.399	16	0.015	0	23	MDPIISR	mir 29c
451.241	531.289	16	0.015	0	25	QLELNER	mir 29c
451.241	660.331	16	0.015	0	25	QLELNER	mir 29c
451.241	773.415	16	0.015	0	25	QLELNER	mir 29c
747.863	821.426	25	0.015	0	25	LEESTNYNQQLR	mir 29c
747.863	935.469	25	0.015	0	25	LEESTNYNQQLR	mir 29c
747.863	1036.52	25	0.015	0	25	LEESTNYNQQLR	mir 29c
747.863	1123.55	25	0.015	0	25	LEESTNYNQQLR	mir 29c
640.359	682.363	22	0.015	0	35	LKALGDELHQR	mir 29c
640.359	797.39	22	0.015	0	35	LKALGDELHQR	mir 29c
640.359	854.412	22	0.015	0	35	LKALGDELHQR	mir 29c
640.359	967.496	22	0.015	0	35	LKALGDELHQR	mir 29c
472.743	488.283	17	0.015	0	37	NNIDDVVR	mir 29c
472.743	603.31	17	0.015	0	37	NNIDDVVR	mir 29c
472.743	716.394	17	0.015	0	37	NNIDDVVR	mir 29c
472.743	830.437	17	0.015	0	37	NNIDDVVR	mir 29c
613.315	854.445	24	0.015	0	40	GISNEGQNASIK[HeavyK]	mir 29c
613.316	725.403	24	0.015	0	40	GISNEGQNASIK[HeavyK]	mir 29c
627.333	673.399	22	0.015	0	50	NIHESVSAQIR	mir 29c
627.333	760.431	22	0.015	0	50	NIHESVSAQIR	mir 29c
627.333	889.474	22	0.015	0	50	NIHESVSAQIR	mir 29c
627.333	1026.53	22	0.015	0	50	NIHESVSAQIR	mir 29c
493.768	573.338	20	0.015	0	80	SSAAPPPPPR[HeavyR]	mir 29c
493.769	670.391	20	0.015	0	80	SSAAPPPPPR[HeavyR]	mir 29c
842.468	871.465	28	0.015	8	28	LLLEGISSTHAHHLR	mir 29c
842.468	958.497	28	0.015	8	28	LLLEGISSTHAHHLR	mir 29c
842.468	1045.53	28	0.015	8	28	LLLEGISSTHAHHLR	mir 29c
842.468	1158.61	28	0.015	8	28	LLLEGISSTHAHHLR	mir 29c
487.724	565.309	18	0.015	10	40	FMDVYQR	mir 29c
487.724	680.336	18	0.015	10	40	FMDVYQR	mir 29c
487.724	827.372	18	0.015	10	40	FMDVYQR	mir 29c
586.81	668.36	23	0.015	10	40	SAAGAFGPELSR[HeavyR]	mir 29c
586.811	815.428	23	0.015	10	40	SAAGAFGPELSR[HeavyR]	mir 29c
488.265	531.325	18	0.015	11	31	SSAAQLTAAR	mir 29c
488.265	659.383	18	0.015	11	31	SSAAQLTAAR	mir 29c
488.265	730.421	18	0.015	11	31	SSAAQLTAAR	mir 29c
488.265	801.458	18	0.015	11	31	SSAAQLTAAR	mir 29c
589.788	616.366	21	0.015	11	31	FQDGDNILEK	mir 29c
589.788	731.393	21	0.015	11	31	FQDGDNILEK	mir 29c
589.788	788.415	21	0.015	11	31	FQDGDNILEK	mir 29c
589.788	903.442	21	0.015	11	31	FQDGDNILEK	mir 29c
653.335	718.409	23	0.03	11	31	CLQWTTVIER	mir 29c
653.335	904.489	23	0.03	11	31	CLQWTTVIER	mir 29c
653.335	1032.55	23	0.03	11	31	CLQWTTVIER	mir 29c
653.335	1145.63	23	0.03	11	31	CLQWTTVIER	mir 29c
768.899	430.23	26	0.015	11	31	QVVEEPSPQLPADK	mir 29c
768.899	952.51	26	0.015	11	31	QVVEEPSPQLPADK	mir 29c
768.899	1081.55	26	0.015	11	31	QVVEEPSPQLPADK	mir 29c
768.899	1210.6	26	0.015	11	31	QVVEEPSPQLPADK	mir 29c
427.212	461.235	16	0.015	12	32	THPGGEQK	mir 29c
427.212	518.257	16	0.015	12	32	THPGGEQK	mir 29c
427.212	615.31	16	0.015	12	32	THPGGEQK	mir 29c
427.212	752.369	16	0.015	12	32	THPGGEQK	mir 29c
494.787	562.356	18	0.015	12	32	EISPSVTKK	mir 29c
494.787	659.409	18	0.015	12	32	EISPSVTKK	mir 29c
494.787	746.441	18	0.015	12	32	EISPSVTKK	mir 29c
494.787	859.525	18	0.015	12	32	EISPSVTKK	mir 29c
760.078	341.218	31	0.015	12	32	INSQLVAQQVAQQYATPPPPK	mir 29c
760.078	438.271	31	0.015	12	32	INSQLVAQQVAQQYATPPPPK	mir 29c
760.078	535.324	31	0.015	12	32	INSQLVAQQVAQQYATPPPPK	mir 29c
760.078	870.472	31	0.015	12	32	INSQLVAQQVAQQYATPPPPK	mir 29c
760.078	998.531	31	0.015	12	32	INSQLVAQQVAQQYATPPPPK	mir 29c
723.852	756.4	25	0.015	13	33	ANDINYQDQIPR	mir 29c
723.852	919.463	25	0.015	13	33	ANDINYQDQIPR	mir 29c
723.852	1033.51	25	0.015	13	33	ANDINYQDQIPR	mir 29c
723.852	1146.59	25	0.015	13	33	ANDINYQDQIPR	mir 29c
609.328	590.326	21	0.015	14	34	NTGLLESQLSR	mir 29c
609.328	719.368	21	0.015	14	34	NTGLLESQLSR	mir 29c
609.328	832.452	21	0.015	14	34	NTGLLESQLSR	mir 29c
609.328	1002.56	21	0.015	14	34	NTGLLESQLSR	mir 29c
675.841	775.456	23	0.015	16	36	QASSDSDSILSLK	mir 29c
675.841	862.488	23	0.015	16	36	QASSDSDSILSLK	mir 29c
675.841	977.515	23	0.015	16	36	QASSDSDSILSLK	mir 29c
675.841	1064.55	23	0.015	16	36	QASSDSDSILSLK	mir 29c
610.83	416.214	21	0.015	17	37	TITALAFSPDGK	mir 29c
610.83	650.314	21	0.015	17	37	TITALAFSPDGK	mir 29c
610.83	721.352	21	0.015	17	37	TITALAFSPDGK	mir 29c
610.83	834.436	21	0.015	17	37	TITALAFSPDGK	mir 29c
748.351	750.37	25	0.015	17	37	SSSQENLLDEVMK	mir 29c
748.351	863.454	25	0.015	17	37	SSSQENLLDEVMK	mir 29c
748.351	977.497	25	0.015	17	37	SSSQENLLDEVMK	mir 29c
748.351	1106.54	25	0.015	17	37	SSSQENLLDEVMK	mir 29c
614.338	632.3	21	0.015	18	38	QLAIIGDDINR	mir 29c
614.338	689.321	21	0.015	18	38	QLAIIGDDINR	mir 29c
614.338	802.405	21	0.015	18	38	QLAIIGDDINR	mir 29c
614.338	915.489	21	0.015	18	38	QLAIIGDDINR	mir 29c
585.822	674.372	21	0.015	19	39	GQTIPEDILGK	mir 29c
585.822	771.425	21	0.015	19	39	GQTIPEDILGK	mir 29c
585.822	884.509	21	0.015	19	39	GQTIPEDILGK	mir 29c
585.822	985.556	21	0.015	19	39	GQTIPEDILGK	mir 29c
659.976	761.368	27	0.015	19	39	ELTDTLQAETDQLEDEK	mir 29c
659.976	876.395	27	0.015	19	39	ELTDTLQAETDQLEDEK	mir 29c
659.976	977.442	27	0.015	19	39	ELTDTLQAETDQLEDEK	mir 29c
659.976	1106.48	27	0.015	19	39	ELTDTLQAETDQLEDEK	mir 29c
492.263	522.292	18	0.015	20	40	IGFGSFVEK	mir 29c
492.263	609.324	18	0.015	20	40	IGFGSFVEK	mir 29c
492.263	666.346	18	0.015	20	40	IGFGSFVEK	mir 29c
492.263	813.414	18	0.015	20	40	IGFGSFVEK	mir 29c
729.915	755.466	25	0.015	20	40	DLLSKMLVIDPAK	mir 29c
729.915	902.502	25	0.015	20	40	DLLSKMLVIDPAK	mir 29c
729.915	1030.6	25	0.015	20	40	DLLSKMLVIDPAK	mir 29c
729.915	1117.63	25	0.015	20	40	DLLSKMLVIDPAK	mir 29c
810.408	822.41	27	0.015	20	40	RFPPYHVGQTFDR	mir 29c
810.408	879.443	27	0.015	20	40	FPPYHVGQTFDRR	mir 29c
810.408	959.469	27	0.015	20	40	RFPPYHVGQTFDR	mir 29c
810.408	978.512	27	0.015	20	40	FPPYHVGQTFDRR	mir 29c
810.408	1115.57	27	0.015	20	40	FPPYHVGQTFDRR	mir 29c
810.408	1122.53	27	0.015	20	40	RFPPYHVGQTFDR	mir 29c
810.408	1219.59	27	0.015	20	40	RFPPYHVGQTFDR	mir 29c
810.408	1316.64	27	0.015	20	40	RFPPYHVGQTFDR	mir 29c
810.408	1375.69	27	0.015	20	40	FPPYHVGQTFDRR	mir 29c
810.408	1472.74	27	0.015	20	40	FPPYHVGQTFDRR	mir 29c
898.489	984.563	30	0.015	22	42	ILGADNIDVSHPIIYR	mir 29c
898.489	1099.59	30	0.015	22	42	ILGADNIDVSHPIIYR	mir 29c
898.489	1212.67	30	0.015	22	42	ILGADNIDVSHPIIYR	mir 29c
898.489	1326.72	30	0.015	22	42	ILGADNIDVSHPIIYR	mir 29c
540.321	575.376	19	0.015	24	44	EYLVLTLTK	mir 29c
540.321	674.445	19	0.015	24	44	EYLVLTLTK	mir 29c
540.321	787.529	19	0.015	24	44	EYLVLTLTK	mir 29c
540.321	950.592	19	0.015	24	44	EYLVLTLTK	mir 29c
541.251	575.294	19	0.015	24	44	DYIDQWNK	mir 29c
541.251	690.321	19	0.015	24	44	DYIDQWNK	mir 29c
541.251	803.405	19	0.015	24	44	DYIDQWNK	mir 29c
541.251	966.468	19	0.015	24	44	DYIDQWNK	mir 29c
691.381	702.426	24	0.015	24	44	NIHESVSAQIRK	mir 29c
691.381	801.494	24	0.015	24	44	NIHESVSAQIRK	mir 29c
691.381	888.526	24	0.015	24	44	NIHESVSAQIRK	mir 29c
691.381	1017.57	24	0.015	24	44	NIHESVSAQIRK	mir 29c
696.951	794.31	29	0.015	24	44	GTYLYNDCPGPGQDTDCR	mir 29c
696.951	851.331	29	0.015	24	44	GTYLYNDCPGPGQDTDCR	mir 29c
696.951	948.384	29	0.015	24	44	GTYLYNDCPGPGQDTDCR	mir 29c
696.951	1005.4	29	0.015	24	44	GTYLYNDCPGPGQDTDCR	mir 29c
696.951	1102.46	29	0.015	24	44	GTYLYNDCPGPGQDTDCR	mir 29c
569.78	609.299	20	0.015	25	45	DPFLGFTDAR	mir 29c
569.78	666.321	20	0.015	25	45	DPFLGFTDAR	mir 29c
569.78	779.405	20	0.015	25	45	DPFLGFTDAR	mir 29c
569.78	926.473	20	0.015	25	45	DPFLGFTDAR	mir 29c
682.393	646.367	28	0.015	25	45	RLIQIPQLPENPPNFLR	mir 29c
682.393	743.42	28	0.015	25	45	RLIQIPQLPENPPNFLR	mir 29c
682.393	857.463	28	0.015	25	45	RLIQIPQLPENPPNFLR	mir 29c
682.393	986.505	28	0.015	25	45	RLIQIPQLPENPPNFLR	mir 29c
779.446	815.499	26	0.015	25	45	SALQTEIANLLKEK	mir 29c
779.446	928.583	26	0.015	25	45	SALQTEIANLLKEK	mir 29c
779.446	1057.62	26	0.015	25	45	SALQTEIANLLKEK	mir 29c
779.446	1158.67	26	0.015	25	45	SALQTEIANLLKEK	mir 29c
661.336	615.31	23	0.015	26	46	GWPKTHPGGEQK	mir 29c
661.336	752.369	23	0.015	26	46	GWPKTHPGGEQK	mir 29c
661.336	853.416	23	0.015	26	46	GWPKTHPGGEQK	mir 29c
661.336	981.511	23	0.015	26	46	GWPKTHPGGEQK	mir 29c
737.354	899.462	25	0.015	26	46	GDFPGTYVEYIGR	mir 29c
737.354	1000.51	25	0.015	26	46	GDFPGTYVEYIGR	mir 29c
737.354	1057.53	25	0.015	26	46	GDFPGTYVEYIGR	mir 29c
737.354	1154.58	25	0.015	26	46	GDFPGTYVEYIGR	mir 29c
699.338	770.383	24	0.015	28	48	AQEALDFYGEVR	mir 29c
699.338	885.41	24	0.015	28	48	AQEALDFYGEVR	mir 29c
699.338	998.494	24	0.015	28	48	AQEALDFYGEVR	mir 29c
699.338	1198.57	24	0.015	28	48	AQEALDFYGEVR	mir 29c
635.351	702.414	22	0.015	29	49	WVQPGVELSVR	mir 29c
635.351	759.436	22	0.015	29	49	WVQPGVELSVR	mir 29c
635.351	856.489	22	0.015	29	49	WVQPGVELSVR	mir 29c
635.351	984.547	22	0.015	29	49	WVQPGVELSVR	mir 29c
472.313	486.365	17	0.015	30	50	SLLSGLLIK	mir 29c
472.313	543.386	17	0.015	30	50	SLLSGLLIK	mir 29c
472.313	630.418	17	0.015	30	50	SLLSGLLIK	mir 29c
472.313	743.503	17	0.015	30	50	SLLSGLLIK	mir 29c
991.481	1084.57	33	0.015	32	52	TATGYGFAEPYNLYSSLK	mir 29c
991.481	1213.61	33	0.015	32	52	TATGYGFAEPYNLYSSLK	mir 29c
991.481	1284.65	33	0.015	32	52	TATGYGFAEPYNLYSSLK	mir 29c
991.481	1431.71	33	0.015	32	52	TATGYGFAEPYNLYSSLK	mir 29c
857.417	760.435	29	0.015	33	53	FPYDSWGTPFQQLK	mir 29c
857.417	861.483	29	0.015	33	53	FPYDSWGTPFQQLK	mir 29c
857.417	918.504	29	0.015	33	53	FPYDSWGTPFQQLK	mir 29c
857.417	1104.58	29	0.015	33	53	FPYDSWGTPFQQLK	mir 29c
857.417	1191.62	29	0.015	33	53	FPYDSWGTPFQQLK	mir 29c
798.923	836.462	27	0.015	34	54	SFADINLYREQIK	mir 29c
798.923	949.547	27	0.015	34	54	SFADINLYREQIK	mir 29c
798.923	1063.59	27	0.015	34	54	SFADINLYREQIK	mir 29c
798.923	1176.67	27	0.015	34	54	SFADINLYREQIK	mir 29c
650.877	671.445	22	0.015	35	55	SALQTEIANLLK	mir 29c
650.877	800.488	22	0.015	35	55	SALQTEIANLLK	mir 29c
650.877	901.535	22	0.015	35	55	SALQTEIANLLK	mir 29c
630.36	646.367	26	0.015	36	56	LIQIPQLPENPPNFLR	mir 29c
630.36	743.42	26	0.015	36	56	LIQIPQLPENPPNFLR	mir 29c
630.36	857.463	26	0.015	36	56	LIQIPQLPENPPNFLR	mir 29c
630.36	1083.56	26	0.015	36	56	LIQIPQLPENPPNFLR	mir 29c
935.473	1003.52	31	0.015	37	57	FYGAEIVSALDYLHSGK	mir 29c
935.473	1090.55	31	0.015	37	57	FYGAEIVSALDYLHSGK	mir 29c
935.473	1189.62	31	0.015	37	57	FYGAEIVSALDYLHSGK	mir 29c
935.473	1302.7	31	0.015	37	57	FYGAEIVSALDYLHSGK	mir 29c
858.488	385.256	29	0.015	38	58	ELIQTSALNFLTPLR	mir 29c
858.488	860.499	29	0.015	38	58	ELIQTSALNFLTPLR	mir 29c
858.488	973.583	29	0.015	38	58	ELIQTSALNFLTPLR	mir 29c
858.488	1044.62	29	0.015	38	58	ELIQTSALNFLTPLR	mir 29c
858.488	1131.65	29	0.015	38	58	ELIQTSALNFLTPLR	mir 29c
352.203	389.239	14	0.02	0	20	VSQELK	mir 30c method 1
352.203	517.298	14	0.02	0	20	VSQELK	mir 30c method 1
352.203	604.33	14	0.02	0	20	VSQELK	mir 30c method 1
493.768	573.338	20	0.02	0	20	SSAAPPPPPR[HeavyR]	mir 30c method 1
493.769	670.391	20	0.02	0	20	SSAAPPPPPR[HeavyR]	mir 30c method 1
722.285	792.301	25	0.04	0	20	HQSDPSEDEDER	mir 30c method 1
722.285	879.333	25	0.04	0	20	HQSDPSEDEDER	mir 30c method 1
722.285	976.385	25	0.04	0	20	HQSDPSEDEDER	mir 30c method 1
347.698	377.214	13	0.02	0	25	VAFTTR	mir 30c method 1
347.698	524.283	13	0.02	0	25	VAFTTR	mir 30c method 1
347.698	595.32	13	0.02	0	25	VAFTTR	mir 30c method 1
814.405	837.37	27	0.02	0	30	ILLDAQHESGQSSSR	mir 30c method 1
814.405	974.429	27	0.02	0	30	ILLDAQHESGQSSSR	mir 30c method 1
814.405	1102.49	27	0.02	0	30	ILLDAQHESGQSSSR	mir 30c method 1
844.866	918.441	28	0.02	0	30	DHSSQSEEEVVEGEK	mir 30c method 1
844.866	1047.48	28	0.02	0	30	DHSSQSEEEVVEGEK	mir 30c method 1
844.866	1134.52	28	0.02	0	30	DHSSQSEEEVVEGEK	mir 30c method 1
613.315	854.445	24	0.02	0	40	GISNEGQNASIK[HeavyK]	mir 30c method 1
613.316	725.403	24	0.02	0	40	GISNEGQNASIK[HeavyK]	mir 30c method 1
436.735	437.214	16	0.02	0	80	QPPIDFR	mir 30c method 1
436.735	550.298	16	0.02	0	80	QPPIDFR	mir 30c method 1
436.735	647.351	16	0.02	0	80	QPPIDFR	mir 30c method 1
436.735	744.404	16	0.02	0	80	QPPIDFR	mir 30c method 1
451.246	460.226	16	0.02	0	80	LQLSNGNR	mir 30c method 1
451.246	547.258	16	0.02	0	80	LQLSNGNR	mir 30c method 1
451.246	660.342	16	0.02	0	80	LQLSNGNR	mir 30c method 1
586.81	668.36	23	0.02	0	80	SAAGAFGPELSR[HeavyR]	mir 30c method 1
586.811	815.428	23	0.02	0	80	SAAGAFGPELSR[HeavyR]	mir 30c method 1
598.837	607.345	21	0.02	0	80	KGGIFSAEFLK	mir 30c method 1
598.837	694.377	21	0.02	0	80	KGGIFSAEFLK	mir 30c method 1
598.837	841.445	21	0.02	0	80	KGGIFSAEFLK	mir 30c method 1
600.827	617.35	21	0.02	0	80	LGAGIDGVEEIK	mir 30c method 1
600.827	674.372	21	0.02	0	80	LGAGIDGVEEIK	mir 30c method 1
600.827	789.399	21	0.02	0	80	LGAGIDGVEEIK	mir 30c method 1
608.321	692.434	25	0.02	0	80	NYFTSVAHPNLFIATK	mir 30c method 1
608.321	806.477	25	0.02	0	80	NYFTSVAHPNLFIATK	mir 30c method 1
608.321	903.53	25	0.02	0	80	NYFTSVAHPNLFIATK	mir 30c method 1
639.289	444.282	27	0.02	0	80	EDAGTYWCEVFNPISK	mir 30c method 1
639.289	705.393	27	0.02	0	80	EDAGTYWCEVFNPISK	mir 30c method 1
639.289	804.461	27	0.02	0	80	EDAGTYWCEVFNPISK	mir 30c method 1
639.289	933.504	27	0.02	0	80	EDAGTYWCEVFNPISK	mir 30c method 1
642.822	716.394	22	0.02	0	80	ISCHADLEALR	mir 30c method 1
642.822	787.431	22	0.02	0	80	ISCHADLEALR	mir 30c method 1
642.822	924.49	22	0.02	0	80	ISCHADLEALR	mir 30c method 1
654.346	569.402	27	0.02	0	80	TQLYVTAQDEDQPVLLK	mir 30c method 1
654.346	697.461	27	0.02	0	80	TQLYVTAQDEDQPVLLK	mir 30c method 1
654.346	812.488	27	0.02	0	80	TQLYVTAQDEDQPVLLK	mir 30c method 1
654.346	941.53	27	0.02	0	80	TQLYVTAQDEDQPVLLK	mir 30c method 1
654.37	494.309	23	0.02	0	80	VSQELKEPLHK	mir 30c method 1
654.37	751.446	23	0.02	0	80	VSQELKEPLHK	mir 30c method 1
654.37	864.53	23	0.02	0	80	VSQELKEPLHK	mir 30c method 1
654.37	993.573	23	0.02	0	80	VSQELKEPLHK	mir 30c method 1
662.843	787.457	23	0.02	0	80	FDQFWAINRK	mir 30c method 1
662.843	934.526	23	0.02	0	80	FDQFWAINRK	mir 30c method 1
662.843	1062.58	23	0.02	0	80	FDQFWAINRK	mir 30c method 1
664.028	357.25	28	0.02	0	80	KEDLVFIFWAPESAPLK	mir 30c method 1
664.028	741.414	28	0.02	0	80	KEDLVFIFWAPESAPLK	mir 30c method 1
664.028	812.451	28	0.02	0	80	KEDLVFIFWAPESAPLK	mir 30c method 1
664.028	998.531	28	0.02	0	80	KEDLVFIFWAPESAPLK	mir 30c method 1
678.878	773.452	23	0.02	0	80	LGAGIDGVEEIKR	mir 30c method 1
678.878	830.473	23	0.02	0	80	LGAGIDGVEEIKR	mir 30c method 1
678.878	945.5	23	0.02	0	80	LGAGIDGVEEIKR	mir 30c method 1
686.348	788.415	28	0.02	0	80	ANDQYLTAAALHNLDEAVK	mir 30c method 1
686.348	925.474	28	0.02	0	80	ANDQYLTAAALHNLDEAVK	mir 30c method 1
686.348	1038.56	28	0.02	0	80	ANDQYLTAAALHNLDEAVK	mir 30c method 1
693.038	572.377	29	0.02	0	80	EDLVFIFWAPESAPLKSK	mir 30c method 1
693.038	730.446	29	0.02	0	80	EDLVFIFWAPESAPLKSK	mir 30c method 1
693.038	859.488	29	0.02	0	80	EDLVFIFWAPESAPLKSK	mir 30c method 1
693.038	956.541	29	0.02	0	80	EDLVFIFWAPESAPLKSK	mir 30c method 1
728.032	858.41	30	0.02	0	80	TITGSETNLLFFWETHGTK	mir 30c method 1
728.032	1005.48	30	0.02	0	80	TITGSETNLLFFWETHGTK	mir 30c method 1
728.032	1152.55	30	0.02	0	80	TITGSETNLLFFWETHGTK	mir 30c method 1
815.377	832.38	27	0.02	0	80	RSSDPSPAGDNEIER	mir 30c method 1
815.377	903.417	27	0.02	0	80	RSSDPSPAGDNEIER	mir 30c method 1
815.377	1000.47	27	0.02	0	80	RSSDPSPAGDNEIER	mir 30c method 1
815.377	1184.55	27	0.02	0	80	RSSDPSPAGDNEIER	mir 30c method 1
816.442	950.441	33	0.02	0	80	EVLLLVHNLPQQLFGYSWYK	mir 30c method 1
816.442	1063.53	33	0.02	0	80	EVLLLVHNLPQQLFGYSWYK	mir 30c method 1
816.442	1191.58	33	0.02	0	80	EVLLLVHNLPQQLFGYSWYK	mir 30c method 1
816.442	1416.69	33	0.02	0	80	EVLLLVHNLPQQLFGYSWYK	mir 30c method 1
862.921	874.463	29	0.02	0	80	HEWQVNGLDDIKDR	mir 30c method 1
862.921	931.484	29	0.02	0	80	HEWQVNGLDDIKDR	mir 30c method 1
862.921	1045.53	29	0.02	0	80	HEWQVNGLDDIKDR	mir 30c method 1
881.947	889.426	29	0.02	0	80	AVYVVIGDGVEEEQGAK	mir 30c method 1
881.947	946.448	29	0.02	0	80	AVYVVIGDGVEEEQGAK	mir 30c method 1
881.947	1061.47	29	0.02	0	80	AVYVVIGDGVEEEQGAK	mir 30c method 1
893.497	898.572	30	0.02	0	80	NNGVLFENQLLQIGVK	mir 30c method 1
893.497	1012.62	30	0.02	0	80	NNGVLFENQLLQIGVK	mir 30c method 1
893.497	1141.66	30	0.02	0	80	NNGVLFENQLLQIGVK	mir 30c method 1
902.8	585.335	37	0.02	0	80	VLLSICSLLCDPNPDDPLVPEIAR	mir 30c method 1
902.8	894.541	37	0.02	0	80	VLLSICSLLCDPNPDDPLVPEIAR	mir 30c method 1
902.8	1009.57	37	0.02	0	80	VLLSICSLLCDPNPDDPLVPEIAR	mir 30c method 1
902.8	1124.6	37	0.02	0	80	VLLSICSLLCDPNPDDPLVPEIAR	mir 30c method 1
902.8	1221.65	37	0.02	0	80	VLLSICSLLCDPNPDDPLVPEIAR	mir 30c method 1
902.8	1432.74	37	0.02	0	80	VLLSICSLLCDPNPDDPLVPEIAR	mir 30c method 1
904.96	967.463	30	0.02	0	80	HPFFVTIDWNTLYR	mir 30c method 1
904.96	1080.55	30	0.02	0	80	HPFFVTIDWNTLYR	mir 30c method 1
904.96	1181.6	30	0.02	0	80	HPFFVTIDWNTLYR	mir 30c method 1
941.498	981.515	31	0.02	0	80	ALQMLLSQPVTYQAFR	mir 30c method 1
941.498	1109.57	31	0.02	0	80	ALQMLLSQPVTYQAFR	mir 30c method 1
941.498	1196.61	31	0.02	0	80	ALQMLLSQPVTYQAFR	mir 30c method 1
993.163	1022.53	40	0.02	0	80	FTFIPDQSFDQLFQLQEITLYNNR	mir 30c method 1
993.163	1150.59	40	0.02	0	80	FTFIPDQSFDQLFQLQEITLYNNR	mir 30c method 1
993.163	1263.67	40	0.02	0	80	FTFIPDQSFDQLFQLQEITLYNNR	mir 30c method 1
1037.54	7 989.578	42	0.02	0	80	VLLSICSLLCDPNPDDPLVPEIARIYK	mir 30c method 1
1037.54	7 1088.646	42	0.02	0	80	VLLSICSLLCDPNPDDPLVPEIARIYK	mir 30c method 1
1037.54	7 1201.730	42	0.02	0	80	VLLSICSLLCDPNPDDPLVPEIARIYK	mir 30c method 1
1037.54	7 1298.783	42	0.02	0	80	VLLSICSLLCDPNPDDPLVPEIARIYK	mir 30c method 1
566.827	593.352	20	0.02	10	30	LESLPAHLPR	mir 30c method 1
566.827	690.405	20	0.02	10	30	LESLPAHLPR	mir 30c method 1
566.827	803.489	20	0.02	10	30	LESLPAHLPR	mir 30c method 1
422.738	559.332	18	0.02	15	30	IGDYAGIK[HeavyK]	mir 30c method 1
422.739	674.359	18	0.02	15	30	IGDYAGIK[HeavyK]	mir 30c method 1
701.841	486.267	24	0.02	17	37	YPELYNHPDVR	mir 30c method 1
701.841	737.369	24	0.02	17	37	YPELYNHPDVR	mir 30c method 1
701.841	900.432	24	0.02	17	37	YPELYNHPDVR	mir 30c method 1
701.841	1013.52	24	0.02	17	37	YPELYNHPDVR	mir 30c method 1
701.841	1239.61	24	0.02	17	37	YPELYNHPDVR	mir 30c method 1
667.669	709.389	28	0.02	17	40	TPTDSPGVPPSANAHHLFR	mir 30c method 1
667.669	780.426	28	0.02	17	40	TPTDSPGVPPSANAHHLFR	mir 30c method 1
667.669	894.469	28	0.02	17	40	TPTDSPGVPPSANAHHLFR	mir 30c method 1
667.669	1149.59	28	0.02	17	40	TPTDSPGVPPSANAHHLFR	mir 30c method 1
667.669	1246.64	28	0.02	17	40	TPTDSPGVPPSANAHHLFR	mir 30c method 1
667.669	1499.79	28	0.02	17	40	TPTDSPGVPPSANAHHLFR	mir 30c method 1
619.815	663.324	22	0.02	18	38	IMTTLNMLGGR	mir 30c method 1
619.815	776.408	22	0.02	18	38	IMTTLNMLGGR	mir 30c method 1
619.815	877.456	22	0.02	18	38	IMTTLNMLGGR	mir 30c method 1
558.325	719.371	22	0.02	20	50	GLILVGGYGTR[HeavyR]	mir 30c method 1
558.326	620.302	22	0.02	20	50	GLILVGGYGTR[HeavyR]	mir 30c method 1
613.296	688.378	21	0.02	22	42	SDTAYQWNLK	mir 30c method 1
613.296	851.441	21	0.02	22	42	SDTAYQWNLK	mir 30c method 1
613.296	922.478	21	0.02	22	42	SDTAYQWNLK	mir 30c method 1
874.908	974.414	29	0.02	23	43	AVSLSMGLYMGETETK	mir 30c method 1
874.908	1087.5	29	0.02	23	43	AVSLSMGLYMGETETK	mir 30c method 1
874.908	1144.52	29	0.02	23	43	AVSLSMGLYMGETETK	mir 30c method 1
727.357	774.399	25	0.02	24	44	HEWQVNGLDDIK	mir 30c method 1
727.357	873.468	25	0.02	24	44	HEWQVNGLDDIK	mir 30c method 1
727.357	1001.53	25	0.02	24	44	HEWQVNGLDDIK	mir 30c method 1
612.851	657.429	21	0.02	24	50	THIDTVINALK	mir 30c method 1
612.851	758.477	21	0.02	24	50	THIDTVINALK	mir 30c method 1
612.851	873.504	21	0.02	24	50	THIDTVINALK	mir 30c method 1
636.351	700.41	22	0.02	26	46	LLEESIANLNR	mir 30c method 1
636.351	787.442	22	0.02	26	46	LLEESIANLNR	mir 30c method 1
636.351	916.485	22	0.02	26	46	LLEESIANLNR	mir 30c method 1
598.796	659.362	21	0.02	28	48	FDQFWAINR	mir 30c method 1
598.796	806.431	21	0.02	28	48	FDQFWAINR	mir 30c method 1
598.796	934.489	21	0.02	28	48	FDQFWAINR	mir 30c method 1
598.819	707.409	21	0.02	28	48	SAPFSFLSNVK	mir 30c method 1
598.819	794.441	21	0.02	28	48	SAPFSFLSNVK	mir 30c method 1
598.819	941.509	21	0.02	28	48	SAPFSFLSNVK	mir 30c method 1
598.819	1038.56	21	0.02	28	48	SAPFSFLSNVK	mir 30c method 1
795.715	689.398	33	0.02	28	48	NGQAEAEEATEQTHISPNAIFK	mir 30c method 1
795.715	889.514	33	0.02	28	48	NGQAEAEEATEQTHISPNAIFK	mir 30c method 1
795.715	1026.57	33	0.02	28	48	NGQAEAEEATEQTHISPNAIFK	mir 30c method 1
795.715	1127.62	33	0.02	28	48	NGQAEAEEATEQTHISPNAIFK	mir 30c method 1
635.328	753.378	26	0.02	29	49	HPFLVGLHYSFQTTEK	mir 30c method 1
635.328	840.41	26	0.02	29	49	HPFLVGLHYSFQTTEK	mir 30c method 1
635.328	1003.47	26	0.02	29	49	HPFLVGLHYSFQTTEK	mir 30c method 1
569.821	575.34	20	0.02	30	50	VSYLTLVTDK	mir 30c method 1
569.821	676.388	20	0.02	30	50	VSYLTLVTDK	mir 30c method 1
569.821	789.472	20	0.02	30	50	VSYLTLVTDK	mir 30c method 1
498.804	669.38	20	0.02	33	53	LTILEELR[HeavyR]	mir 30c method 1
498.805	782.464	20	0.02	33	53	LTILEELR[HeavyR]	mir 30c method 1
534.79	536.308	19	0.02	35	55	GGIFSAEFLK	mir 30c method 1
534.79	607.345	19	0.02	35	55	GGIFSAEFLK	mir 30c method 1
534.79	694.377	19	0.02	35	55	GGIFSAEFLK	mir 30c method 1
725.363	371.24	25	0.02	35	55	GYDWTLVPMPVR	mir 30c method 1
725.363	615.328	25	0.02	35	55	GYDWTLVPMPVR	mir 30c method 1
725.363	827.481	25	0.02	35	55	GYDWTLVPMPVR	mir 30c method 1
725.363	928.528	25	0.02	35	55	GYDWTLVPMPVR	mir 30c method 1
725.363	1114.61	25	0.02	35	55	GYDWTLVPMPVR	mir 30c method 1
732.707	744.393	30	0.02	35	65	QILVGDIGDTVEDPYTSFVK	mir 30c method 1
732.707	841.445	30	0.02	35	65	QILVGDIGDTVEDPYTSFVK	mir 30c method 1
732.707	956.472	30	0.02	35	65	QILVGDIGDTVEDPYTSFVK	mir 30c method 1
680.374	789.438	26	0.02	38	58	ELASGLSFPVGFK[HeavyK]	mir 30c method 1
680.376	959.544	26	0.02	38	58	ELASGLSFPVGFK[HeavyK]	mir 30c method 1
682.366	774.487	23	0.02	38	58	EAEPYYLLLPR	mir 30c method 1
682.366	937.551	23	0.02	38	58	EAEPYYLLLPR	mir 30c method 1
682.366	1034.6	23	0.02	38	58	EAEPYYLLLPR	mir 30c method 1
714.346	619.345	24	0.02	39	59	IFGDNFDPDFIK	mir 30c method 1
714.346	734.372	24	0.02	39	59	IFGDNFDPDFIK	mir 30c method 1
714.346	881.44	24	0.02	39	59	IFGDNFDPDFIK	mir 30c method 1
714.346	995.483	24	0.02	39	59	IFGDNFDPDFIK	mir 30c method 1
629.364	684.44	22	0.02	42	62	DFLTPPLLSVR	mir 30c method 1
629.364	781.493	22	0.02	42	62	DFLTPPLLSVR	mir 30c method 1
629.364	882.541	22	0.02	42	62	DFLTPPLLSVR	mir 30c method 1
621.329	357.25	26	0.02	47	67	EDLVFIFWAPESAPLK	mir 30c method 1
621.329	644.361	26	0.02	47	67	EDLVFIFWAPESAPLK	mir 30c method 1
621.329	741.414	26	0.02	47	67	EDLVFIFWAPESAPLK	mir 30c method 1
621.329	812.451	26	0.02	47	67	EDLVFIFWAPESAPLK	mir 30c method 1
737.326	775.358	25	0.04	50	80	SSDPSPAGDNEIER	mir 30c method 1
737.326	832.38	25	0.04	50	80	SSDPSPAGDNEIER	mir 30c method 1
737.326	903.417	25	0.04	50	80	SSDPSPAGDNEIER	mir 30c method 1
737.326	1000.47	25	0.04	50	80	SSDPSPAGDNEIER	mir 30c method 1
737.326	1184.55	25	0.04	50	80	SSDPSPAGDNEIER	mir 30c method 1
927.493	930.541	31	0.04	50	80	FYAAEIASALGYLHSIK	mir 30c method 1
927.493	1001.58	31	0.04	50	80	FYAAEIASALGYLHSIK	mir 30c method 1
927.493	1088.61	31	0.04	50	80	FYAAEIASALGYLHSIK	mir 30c method 1
613.315	854.445	24	0.02	0	40	GISNEGQNASIK[HeavyK]	mir30c method2
613.316	725.403	24	0.02	0	40	GISNEGQNASIK[HeavyK]	mir30c method2
347.698	377.214	13	0.02	0	80	VAFTTR	mir30c method2
347.698	524.283	13	0.02	0	80	VAFTTR	mir30c method2
347.698	595.32	13	0.02	0	80	VAFTTR	mir30c method2
486.243	517.273	18	0.02	0	80	IPDEINDR	mir30c method2
486.243	646.315	18	0.02	0	80	IPDEINDR	mir30c method2
486.243	761.342	18	0.02	0	80	IPDEINDR	mir30c method2
486.243	858.395	18	0.02	0	80	IPDEINDR	mir30c method2
493.768	573.338	20	0.02	0	80	SSAAPPPPPR[HeavyR]	mir30c method2
493.769	670.391	20	0.02	0	80	SSAAPPPPPR[HeavyR]	mir30c method2
498.804	669.38	20	0.02	0	80	LTILEELR[HeavyR]	mir30c method2
498.805	782.464	20	0.02	0	80	LTILEELR[HeavyR]	mir30c method2
528.777	466.241	19	0.02	0	80	GTYGIVYAGR	mir30c method2
528.777	565.309	19	0.02	0	80	GTYGIVYAGR	mir30c method2
528.777	678.393	19	0.02	0	80	GTYGIVYAGR	mir30c method2
528.777	735.415	19	0.02	0	80	GTYGIVYAGR	mir30c method2
569.78	609.299	20	0.02	0	80	DPFLGFTDAR	mir30c method2
569.78	666.321	20	0.02	0	80	DPFLGFTDAR	mir30c method2
569.78	779.405	20	0.02	0	80	DPFLGFTDAR	mir30c method2
569.78	926.473	20	0.02	0	80	DPFLGFTDAR	mir30c method2
569.78	1023.53	20	0.02	0	80	DPFLGFTDAR	mir30c method2
578.852	587.34	20	0.02	0	80	FPVLILEPTK	mir30c method2
578.852	700.424	20	0.02	0	80	FPVLILEPTK	mir30c method2
578.852	813.508	20	0.02	0	80	FPVLILEPTK	mir30c method2
578.852	912.576	20	0.02	0	80	FPVLILEPTK	mir30c method2
583.29	407.229	20	0.02	0	80	SQLDISDPYK	mir30c method2
583.29	609.288	20	0.02	0	80	SQLDISDPYK	mir30c method2
583.29	722.372	20	0.02	0	80	SQLDISDPYK	mir30c method2
583.29	837.399	20	0.02	0	80	SQLDISDPYK	mir30c method2
583.29	950.483	20	0.02	0	80	SQLDISDPYK	mir30c method2
598.296	561.324	21	0.02	0	80	DIQDYDSIVK	mir30c method2
598.296	724.388	21	0.02	0	80	DIQDYDSIVK	mir30c method2
598.296	839.415	21	0.02	0	80	DIQDYDSIVK	mir30c method2
598.296	967.473	21	0.02	0	80	DIQDYDSIVK	mir30c method2
602.281	612.3	21	0.02	0	80	SFEDIHHYR	mir30c method2
602.281	725.384	21	0.02	0	80	SFEDIHHYR	mir30c method2
602.281	840.411	21	0.02	0	80	SFEDIHHYR	mir30c method2
602.281	969.454	21	0.02	0	80	SFEDIHHYR	mir30c method2
605.827	693.357	21	0.02	0	80	FATVVEELFR	mir30c method2
605.827	792.425	21	0.02	0	80	FATVVEELFR	mir30c method2
605.827	891.493	21	0.02	0	80	FATVVEELFR	mir30c method2
605.827	992.541	21	0.02	0	80	FATVVEELFR	mir30c method2
609.33	632.398	21	0.02	0	80	SQWSPALTISK	mir30c method2
609.33	729.451	21	0.02	0	80	SQWSPALTISK	mir30c method2
609.33	816.483	21	0.02	0	80	SQWSPALTISK	mir30c method2
609.33	1002.56	21	0.02	0	80	SQWSPALTISK	mir30c method2
619.288	645.357	22	0.02	0	80	SNDFEELVER	mir30c method2
619.288	774.399	22	0.02	0	80	SNDFEELVER	mir30c method2
619.288	921.468	22	0.02	0	80	SNDFEELVER	mir30c method2
619.288	1036.49	22	0.02	0	80	SNDFEELVER	mir30c method2
635.392	758.441	22	0.02	0	80	LLAITELLQQK	mir30c method2
635.392	859.488	22	0.02	0	80	LLAITELLQQK	mir30c method2
635.392	972.572	22	0.02	0	80	LLAITELLQQK	mir30c method2
635.392	1043.61	22	0.02	0	80	LLAITELLQQK	mir30c method2
646.348	720.404	22	0.02	0	80	ELLDTVNNVFK	mir30c method2
646.348	821.452	22	0.02	0	80	ELLDTVNNVFK	mir30c method2
646.348	936.479	22	0.02	0	80	ELLDTVNNVFK	mir30c method2
646.348	1049.56	22	0.02	0	80	ELLDTVNNVFK	mir30c method2
656.843	795.425	23	0.02	0	80	SYGIPFIETSAK	mir30c method2
656.843	892.477	23	0.02	0	80	SYGIPFIETSAK	mir30c method2
656.843	1005.56	23	0.02	0	80	SYGIPFIETSAK	mir30c method2
656.843	1062.58	23	0.02	0	80	SYGIPFIETSAK	mir30c method2
666.904	569.377	23	0.02	0	80	LITAHVEPLLAR	mir30c method2
666.904	698.42	23	0.02	0	80	LITAHVEPLLAR	mir30c method2
666.904	797.488	23	0.02	0	80	LITAHVEPLLAR	mir30c method2
666.904	934.547	23	0.02	0	80	LITAHVEPLLAR	mir30c method2
666.904	1005.58	23	0.02	0	80	LITAHVEPLLAR	mir30c method2
680.374	789.438	26	0.02	0	80	ELASGLSFPVGFK[HeavyK]	mir30c method2
680.376	959.544	26	0.02	0	80	ELASGLSFPVGFK[HeavyK]	mir30c method2
681.001	694.377	28	0.02	0	80	GIVDQSQQAYQEAFEISK	mir30c method2
681.001	823.42	28	0.02	0	80	GIVDQSQQAYQEAFEISK	mir30c method2
681.001	951.478	28	0.02	0	80	GIVDQSQQAYQEAFEISK	mir30c method2
708.349	591.325	29	0.02	0	80	RDFAEMSSQLHLTPFTAR	mir30c method2
708.349	805.457	29	0.02	0	80	RDFAEMSSQLHLTPFTAR	mir30c method2
708.349	942.516	29	0.02	0	80	RDFAEMSSQLHLTPFTAR	mir30c method2
708.349	1055.6	29	0.02	0	80	RDFAEMSSQLHLTPFTAR	mir30c method2
708.349	1183.66	29	0.02	0	80	RDFAEMSSQLHLTPFTAR	mir30c method2
711.335	742.325	29	0.02	0	80	TAFDEAIAELDTLSEESYK	mir30c method2
711.335	855.409	29	0.02	0	80	TAFDEAIAELDTLSEESYK	mir30c method2
711.335	956.457	29	0.02	0	80	TAFDEAIAELDTLSEESYK	mir30c method2
711.907	385.256	24	0.02	0	80	SVSAPQQIINPIR	mir30c method2
711.907	725.467	24	0.02	0	80	SVSAPQQIINPIR	mir30c method2
711.907	853.525	24	0.02	0	80	SVSAPQQIINPIR	mir30c method2
711.907	981.584	24	0.02	0	80	SVSAPQQIINPIR	mir30c method2
711.907	1078.64	24	0.02	0	80	SVSAPQQIINPIR	mir30c method2
727.357	804.447	30	0.02	0	80	DFAEMSSQLHLTPFTARGR	mir30c method2
727.357	905.495	30	0.02	0	80	DFAEMSSQLHLTPFTARGR	mir30c method2
727.357	1018.58	30	0.02	0	80	DFAEMSSQLHLTPFTARGR	mir30c method2
727.357	1155.64	30	0.02	0	80	DFAEMSSQLHLTPFTARGR	mir30c method2
730.951	569.377	25	0.02	0	80	KLITAHVEPLLAR	mir30c method2
730.951	797.488	25	0.02	0	80	KLITAHVEPLLAR	mir30c method2
730.951	934.547	25	0.02	0	80	KLITAHVEPLLAR	mir30c method2
730.951	1005.58	25	0.02	0	80	KLITAHVEPLLAR	mir30c method2
730.951	1106.63	25	0.02	0	80	KLITAHVEPLLAR	mir30c method2
745.404	763.435	25	0.02	0	80	SVQNLANLVEFGAK	mir30c method2
745.404	877.478	25	0.02	0	80	SVQNLANLVEFGAK	mir30c method2
745.404	948.515	25	0.02	0	80	SVQNLANLVEFGAK	mir30c method2
745.404	1061.6	25	0.02	0	80	SVQNLANLVEFGAK	mir30c method2
746.366	373.208	31	0.02	0	80	TDVTPSTTSPPSYDSVTKPEK	mir30c method2
746.366	788.451	31	0.02	0	80	TDVTPSTTSPPSYDSVTKPEK	mir30c method2
746.366	903.478	31	0.02	0	80	TDVTPSTTSPPSYDSVTKPEK	mir30c method2
746.366	1066.54	31	0.02	0	80	TDVTPSTTSPPSYDSVTKPEK	mir30c method2
746.366	1153.57	31	0.02	0	80	TDVTPSTTSPPSYDSVTKPEK	mir30c method2
746.366	1250.63	31	0.02	0	80	TDVTPSTTSPPSYDSVTKPEK	mir30c method2
746.366	1347.68	31	0.02	0	80	TDVTPSTTSPPSYDSVTKPEK	mir30c method2
764.87	882.472	26	0.02	0	80	FDPDATQFIEFAK	mir30c method2
764.87	983.52	26	0.02	0	80	FDPDATQFIEFAK	mir30c method2
764.87	1054.56	26	0.02	0	80	FDPDATQFIEFAK	mir30c method2
764.87	1169.58	26	0.02	0	80	FDPDATQFIEFAK	mir30c method2
764.87	1266.64	26	0.02	0	80	FDPDATQFIEFAK	mir30c method2
774.86	876.406	26	0.02	0	80	SVTEQGAELSNEER	mir30c method2
774.86	947.443	26	0.02	0	80	SVTEQGAELSNEER	mir30c method2
774.86	1004.46	26	0.02	0	80	SVTEQGAELSNEER	mir30c method2
776.373	795.4	32	0.02	0	80	EMSPLVDNIALWMTEYLNR	mir30c method2
776.373	942.435	32	0.02	0	80	EMSPLVDNIALWMTEYLNR	mir30c method2
776.373	1128.51	32	0.02	0	80	EMSPLVDNIALWMTEYLNR	mir30c method2
776.373	1241.6	32	0.02	0	80	EMSPLVDNIALWMTEYLNR	mir30c method2
784.375	838.379	32	0.02	0	80	VGNTVPFGAGAAVGGGGGSSSSSEDVK	mir30c method2
784.375	925.411	32	0.02	0	80	VGNTVPFGAGAAVGGGGGSSSSSEDVK	mir30c method2
784.375	982.432	32	0.02	0	80	VGNTVPFGAGAAVGGGGGSSSSSEDVK	mir30c method2
784.375	1039.45	32	0.02	0	80	VGNTVPFGAGAAVGGGGGSSSSSEDVK	mir30c method2
784.962	862.54	27	0.02	0	80	LIHQTNLILQTFK	mir30c method2
784.962	976.583	27	0.02	0	80	LIHQTNLILQTFK	mir30c method2
784.962	1077.63	27	0.02	0	80	LIHQTNLILQTFK	mir30c method2
784.962	1205.69	27	0.02	0	80	LIHQTNLILQTFK	mir30c method2
785.369	883.416	32	0.02	0	80	LIQNHFVDEYDPTIEDSYR	mir30c method2
785.369	980.468	32	0.02	0	80	LIQNHFVDEYDPTIEDSYR	mir30c method2
785.369	1095.49	32	0.02	0	80	LIQNHFVDEYDPTIEDSYR	mir30c method2
785.369	1258.56	32	0.02	0	80	LIQNHFVDEYDPTIEDSYR	mir30c method2
785.417	792.421	27	0.02	0	80	SYGIPFIETSAKTR	mir30c method2
785.417	905.505	27	0.02	0	80	SYGIPFIETSAKTR	mir30c method2
785.417	1052.57	27	0.02	0	80	SYGIPFIETSAKTR	mir30c method2
785.417	1149.63	27	0.02	0	80	SYGIPFIETSAKTR	mir30c method2
833.942	857.484	28	0.02	0	80	HHLNNPPPSQVGLTR	mir30c method2
833.942	954.537	28	0.02	0	80	HHLNNPPPSQVGLTR	mir30c method2
833.942	1051.59	28	0.02	0	80	HHLNNPPPSQVGLTR	mir30c method2
833.942	1165.63	28	0.02	0	80	HHLNNPPPSQVGLTR	mir30c method2
836.409	907.448	34	0.02	0	80	VGNTVPFGAGAAVGGGGGSSSSSEDVKR	mir30c method2
836.409	994.48	34	0.02	0	80	VGNTVPFGAGAAVGGGGGSSSSSEDVKR	mir30c method2
836.409	1081.51	34	0.02	0	80	VGNTVPFGAGAAVGGGGGSSSSSEDVKR	mir30c method2
836.409	1138.53	34	0.02	0	80	VGNTVPFGAGAAVGGGGGSSSSSEDVKR	mir30c method2
844.895	904.448	28	0.02	0	80	QQEEAQAAAAAASAESR	mir30c method2
844.895	975.485	28	0.02	0	80	QQEEAQAAAAAASAESR	mir30c method2
844.895	1103.54	28	0.02	0	80	QQEEAQAAAAAASAESR	mir30c method2
844.895	1174.58	28	0.02	0	80	QQEEAQAAAAAASAESR	mir30c method2
851.441	700.414	28	0.02	0	80	GGAFAPGAEPFPALFPR	mir30c method2
851.441	944.535	28	0.02	0	80	GGAFAPGAEPFPALFPR	mir30c method2
851.441	1073.58	28	0.02	0	80	GGAFAPGAEPFPALFPR	mir30c method2
851.441	1144.62	28	0.02	0	80	GGAFAPGAEPFPALFPR	mir30c method2
851.441	1201.64	28	0.02	0	80	GGAFAPGAEPFPALFPR	mir30c method2
851.441	1298.69	28	0.02	0	80	GGAFAPGAEPFPALFPR	mir30c method2
851.923	961.52	29	0.02	0	80	EDEGTPIKEDIITDK	mir30c method2
851.923	1074.6	29	0.02	0	80	EDEGTPIKEDIITDK	mir30c method2
851.923	1171.66	29	0.02	0	80	EDEGTPIKEDIITDK	mir30c method2
851.923	1272.7	29	0.02	0	80	EDEGTPIKEDIITDK	mir30c method2
852.431	686.398	29	0.02	0	80	GGGFAPGTEPFPGLFPR	mir30c method2
852.431	930.52	29	0.02	0	80	GGGFAPGTEPFPGLFPR	mir30c method2
852.431	1059.56	29	0.02	0	80	GGGFAPGTEPFPGLFPR	mir30c method2
852.431	1160.61	29	0.02	0	80	GGGFAPGTEPFPGLFPR	mir30c method2
852.431	1217.63	29	0.02	0	80	GGGFAPGTEPFPGLFPR	mir30c method2
852.431	1314.68	29	0.02	0	80	GGGFAPGTEPFPGLFPR	mir30c method2
854.908	915.52	29	0.02	0	80	EEDPHEGKIWFHGK	mir30c method2
854.908	972.541	29	0.02	0	80	EEDPHEGKIWFHGK	mir30c method2
854.908	1101.58	29	0.02	0	80	EEDPHEGKIWFHGK	mir30c method2
854.908	1238.64	29	0.02	0	80	EEDPHEGKIWFHGK	mir30c method2
854.908	1335.7	29	0.02	0	80	EEDPHEGKIWFHGK	mir30c method2
867.417	961.52	29	0.02	0	80	ECDGTPIKEDTLIDK	mir30c method2
867.417	1074.6	29	0.02	0	80	ECDGTPIKEDTLIDK	mir30c method2
867.417	1171.66	29	0.02	0	80	ECDGTPIKEDTLIDK	mir30c method2
867.417	1272.7	29	0.02	0	80	ECDGTPIKEDTLIDK	mir30c method2
873.445	345.213	36	0.02	0	80	VSEPVEIGIQVTPDEDDHLLSPTK	mir30c method2
873.445	910.499	36	0.02	0	80	VSEPVEIGIQVTPDEDDHLLSPTK	mir30c method2
873.445	1025.53	36	0.02	0	80	VSEPVEIGIQVTPDEDDHLLSPTK	mir30c method2
873.445	1154.57	36	0.02	0	80	VSEPVEIGIQVTPDEDDHLLSPTK	mir30c method2
873.445	1269.6	36	0.02	0	80	VSEPVEIGIQVTPDEDDHLLSPTK	mir30c method2
873.445	1366.65	36	0.02	0	80	VSEPVEIGIQVTPDEDDHLLSPTK	mir30c method2
879.915	911.399	29	0.02	0	80	TVSIFNWDEYIEDK	mir30c method2
879.915	1097.48	29	0.02	0	80	TVSIFNWDEYIEDK	mir30c method2
879.915	1211.52	29	0.02	0	80	TVSIFNWDEYIEDK	mir30c method2
879.915	1358.59	29	0.02	0	80	TVSIFNWDEYIEDK	mir30c method2
908.943	975.485	30	0.02	0	80	KQQEEAQAAAAAASAESR	mir30c method2
908.943	1103.54	30	0.02	0	80	KQQEEAQAAAAAASAESR	mir30c method2
908.943	1174.58	30	0.02	0	80	KQQEEAQAAAAAASAESR	mir30c method2
908.943	1303.62	30	0.02	0	80	KQQEEAQAAAAAASAESR	mir30c method2
911.993	857.484	30	0.02	0	80	RHHLNNPPPSQVGLTR	mir30c method2
911.993	916.532	30	0.02	0	80	HHLNNPPPSQVGLTRR	mir30c method2
911.993	954.537	30	0.02	0	80	RHHLNNPPPSQVGLTR	mir30c method2
911.993	1013.59	30	0.02	0	80	HHLNNPPPSQVGLTRR	mir30c method2
911.993	1051.59	30	0.02	0	80	RHHLNNPPPSQVGLTR	mir30c method2
911.993	1110.64	30	0.02	0	80	HHLNNPPPSQVGLTRR	mir30c method2
911.993	1165.63	30	0.02	0	80	RHHLNNPPPSQVGLTR	mir30c method2
911.993	1207.69	30	0.02	0	80	HHLNNPPPSQVGLTRR	mir30c method2
911.993	1279.67	30	0.02	0	80	RHHLNNPPPSQVGLTR	mir30c method2
983.97	591.325	32	0.02	0	80	DFAEMSSQLHLTPFTAR	mir30c method2
983.97	1055.6	32	0.02	0	80	DFAEMSSQLHLTPFTAR	mir30c method2
983.97	1183.66	32	0.02	0	80	DFAEMSSQLHLTPFTAR	mir30c method2
983.97	1270.69	32	0.02	0	80	DFAEMSSQLHLTPFTAR	mir30c method2
983.97	1357.72	32	0.02	0	80	DFAEMSSQLHLTPFTAR	mir30c method2
989.817	980.468	40	0.02	0	80	SALTIQLIQNHFVDEYDPTIEDSYR	mir30c method2
989.817	1095.49	40	0.02	0	80	SALTIQLIQNHFVDEYDPTIEDSYR	mir30c method2
989.817	1258.56	40	0.02	0	80	SALTIQLIQNHFVDEYDPTIEDSYR	mir30c method2
989.817	1387.6	40	0.02	0	80	SALTIQLIQNHFVDEYDPTIEDSYR	mir30c method2
1023.8	1 1003.521	41	0.02	0	80	NEAETTSMVSMPLYAVMYPVFNELER	mir30c method2
1023.8	1 1166.584	41	0.02	0	80	NEAETTSMVSMPLYAVMYPVFNELER	mir30c method2
1023.8	1 1313.619	41	0.02	0	80	NEAETTSMVSMPLYAVMYPVFNELER	mir30c method2
1023.8	1 1412.688	41	0.02	0	80	NEAETTSMVSMPLYAVMYPVFNELER	mir30c method2
1023.8	1 1483.725	41	0.02	0	80	NEAETTSMVSMPLYAVMYPVFNELER	mir30c method2
422.738	559.332	18	0.02	15	40	IGDYAGIK[HeavyK]	mir30c method2
422.739	674.359	18	0.02	15	40	IGDYAGIK[HeavyK]	mir30c method2
586.81	668.36	23	0.02	20	40	SAAGAFGPELSR[HeavyR]	mir30c method2
586.811	815.428	23	0.02	20	40	SAAGAFGPELSR[HeavyR]	mir30c method2
558.325	719.371	22	0.02	30	50	GLILVGGYGTR[HeavyR]	mir30c method2
558.326	620.302	22	0.02	30	50	GLILVGGYGTR[HeavyR]	mir30c method2
613.315	854.445	24	0		40	GISNEGQNASIK[HeavyK]	mir30d method 1
613.316	725.403	24	0		40	GISNEGQNASIK[HeavyK]	mir30d method 1
347.698	377.214	13	0		80	VAFTTR	mir30d method 1
347.698	524.283	13	0		80	VAFTTR	mir30d method 1
347.698	595.32	13	0		80	VAFTTR	mir30d method 1
352.203	389.239	14	0		80	VSQELK	mir30d method 1
352.203	517.298	14	0		80	VSQELK	mir30d method 1
352.203	604.33	14	0		80	VSQELK	mir30d method 1
436.735	437.214	16	0		80	QPPIDFR	mir30d method 1
436.735	550.298	16	0		80	QPPIDFR	mir30d method 1
436.735	647.351	16	0		80	QPPIDFR	mir30d method 1
436.735	744.404	16	0		80	QPPIDFR	mir30d method 1
451.246	460.226	16	0		80	LQLSNGNR	mir30d method 1
451.246	547.258	16	0		80	LQLSNGNR	mir30d method 1
451.246	660.342	16	0		80	LQLSNGNR	mir30d method 1
493.768	573.338	20	0		80	SSAAPPPPPR[HeavyR]	mir30d method 1
493.769	670.391	20	0		80	SSAAPPPPPR[HeavyR]	mir30d method 1
498.804	669.38	20	0		80	LTILEELR[HeavyR]	mir30d method 1
498.805	782.464	20	0		80	LTILEELR[HeavyR]	mir30d method 1
525.775	593.289	19	0		80	VTVSATSSNGK	mir30d method 1
525.775	664.326	19	0		80	VTVSATSSNGK	mir30d method 1
525.775	751.358	19	0		80	VTVSATSSNGK	mir30d method 1
534.79	536.308	19	0		80	GGIFSAEFLK	mir30d method 1
534.79	607.345	19	0		80	GGIFSAEFLK	mir30d method 1
534.79	694.377	19	0		80	GGIFSAEFLK	mir30d method 1
562.327	584.351	20	0		80	LESLPAQLPR	mir30d method 1
562.327	681.404	20	0		80	LESLPAQLPR	mir30d method 1
562.327	794.488	20	0		80	LESLPAQLPR	mir30d method 1
566.791	633.284	20	0		80	RPFVEEAER	mir30d method 1
566.791	732.352	20	0		80	RPFVEEAER	mir30d method 1
566.791	879.421	20	0		80	RPFVEEAER	mir30d method 1
566.791	976.473	20	0		80	RPFVEEAER	mir30d method 1
569.821	575.34	20	0		80	VSYLTLVTDK	mir30d method 1
569.821	676.388	20	0		80	VSYLTLVTDK	mir30d method 1
569.821	789.472	20	0		80	VSYLTLVTDK	mir30d method 1
580.781	633.32	20	0		80	AEGAAQLSEER	mir30d method 1
580.781	761.379	20	0		80	AEGAAQLSEER	mir30d method 1
580.781	832.416	20	0		80	AEGAAQLSEER	mir30d method 1
593.819	617.35	21	0		80	LGAGVDGVEEIK	mir30d method 1
593.819	674.372	21	0		80	LGAGVDGVEEIK	mir30d method 1
593.819	789.399	21	0		80	LGAGVDGVEEIK	mir30d method 1
598.796	659.362	21	0		80	FDQFWAINR	mir30d method 1
598.796	806.431	21	0		80	FDQFWAINR	mir30d method 1
598.796	934.489	21	0		80	FDQFWAINR	mir30d method 1
598.819	707.409	21	0		80	SAPFSFLSNVK	mir30d method 1
598.819	794.441	21	0		80	SAPFSFLSNVK	mir30d method 1
598.819	941.509	21	0		80	SAPFSFLSNVK	mir30d method 1
598.819	1038.56	21	0		80	SAPFSFLSNVK	mir30d method 1
598.837	607.345	21	0		80	KGGIFSAEFLK	mir30d method 1
598.837	694.377	21	0		80	KGGIFSAEFLK	mir30d method 1
598.837	841.445	21	0		80	KGGIFSAEFLK	mir30d method 1
608.321	692.434	25	0		80	NYFTSVAHPNLFIATK	mir30d method 1
608.321	806.477	25	0		80	NYFTSVAHPNLFIATK	mir30d method 1
608.321	903.53	25	0		80	NYFTSVAHPNLFIATK	mir30d method 1
612.645	692.434	26	0		80	NYFTSAAYPELFIATK	mir30d method 1
612.645	821.477	26	0		80	NYFTSAAYPELFIATK	mir30d method 1
612.645	918.529	26	0		80	NYFTSAAYPELFIATK	mir30d method 1
612.851	657.429	21	0		80	THIDTVINALK	mir30d method 1
612.851	758.477	21	0		80	THIDTVINALK	mir30d method 1
612.851	873.504	21	0		80	THIDTVINALK	mir30d method 1
613.296	688.378	21	0		80	SDTAYQWNLK	mir30d method 1
613.296	851.441	21	0		80	SDTAYQWNLK	mir30d method 1
613.296	922.478	21	0		80	SDTAYQWNLK	mir30d method 1
619.815	663.324	22	0		80	IMTTLNMLGGR	mir30d method 1
619.815	776.408	22	0		80	IMTTLNMLGGR	mir30d method 1
619.815	877.456	22	0		80	IMTTLNMLGGR	mir30d method 1
621.329	357.25	26	0		80	EDLVFIFWAPESAPLK	mir30d method 1
621.329	644.361	26	0		80	EDLVFIFWAPESAPLK	mir30d method 1
621.329	741.414	26	0		80	EDLVFIFWAPESAPLK	mir30d method 1
621.329	812.451	26	0		80	EDLVFIFWAPESAPLK	mir30d method 1
629.364	684.44	22	0		80	DFLTPPLLSVR	mir30d method 1
629.364	781.493	22	0		80	DFLTPPLLSVR	mir30d method 1
629.364	882.541	22	0		80	DFLTPPLLSVR	mir30d method 1
635.328	753.378	26	0		80	HPFLVGLHYSFQTTEK	mir30d method 1
635.328	840.41	26	0		80	HPFLVGLHYSFQTTEK	mir30d method 1
635.328	1003.47	26	0		80	HPFLVGLHYSFQTTEK	mir30d method 1
636.351	700.41	22	0		80	LLEESIANLNR	mir30d method 1
636.351	787.442	22	0		80	LLEESIANLNR	mir30d method 1
636.351	916.485	22	0		80	LLEESIANLNR	mir30d method 1
642.822	716.394	22	0		80	ISCHADLEALR	mir30d method 1
642.822	787.431	22	0		80	ISCHADLEALR	mir30d method 1
642.822	924.49	22	0		80	ISCHADLEALR	mir30d method 1
642.862	485.308	22	0		80	VSQDLKEPLQK	mir30d method 1
642.862	742.446	22	0		80	VSQDLKEPLQK	mir30d method 1
642.862	855.53	22	0		80	VSQDLKEPLQK	mir30d method 1
642.862	970.557	22	0		80	VSQDLKEPLQK	mir30d method 1
646.835	716.405	22	0		80	MTLSQNNSILR	mir30d method 1
646.835	844.464	22	0		80	MTLSQNNSILR	mir30d method 1
646.835	931.496	22	0		80	MTLSQNNSILR	mir30d method 1
650.812	781.384	22	0		80	SAPYTYQSDLR	mir30d method 1
650.812	882.432	22	0		80	SAPYTYQSDLR	mir30d method 1
650.812	1045.49	22	0		80	SAPYTYQSDLR	mir30d method 1
650.812	1142.55	22	0		80	SAPYTYQSDLR	mir30d method 1
651.627	557.341	27	0		80	EDAGEYQCEISNPVSVR	mir30d method 1
651.627	671.383	27	0		80	EDAGEYQCEISNPVSVR	mir30d method 1
651.627	758.416	27	0		80	EDAGEYQCEISNPVSVR	mir30d method 1
651.627	871.5	27	0		80	EDAGEYQCEISNPVSVR	mir30d method 1
654.346	569.402	27	0		80	TQLYVTAQDEDQPVLLK	mir30d method 1
654.346	697.461	27	0		80	TQLYVTAQDEDQPVLLK	mir30d method 1
654.346	812.488	27	0		80	TQLYVTAQDEDQPVLLK	mir30d method 1
654.346	941.53	27	0		80	TQLYVTAQDEDQPVLLK	mir30d method 1
659.002	744.425	27	0		80	HYLSTTWLNDLQQEVK	mir30d method 1
659.002	859.452	27	0		80	HYLSTTWLNDLQQEVK	mir30d method 1
659.002	973.495	27	0		80	HYLSTTWLNDLQQEVK	mir30d method 1
662.843	787.457	23	0		80	FDQFWAINRK	mir30d method 1
662.843	934.526	23	0		80	FDQFWAINRK	mir30d method 1
662.843	1062.58	23	0		80	FDQFWAINRK	mir30d method 1
664.028	357.25	28	0		80	KEDLVFIFWAPESAPLK	mir30d method 1
664.028	741.414	28	0		80	KEDLVFIFWAPESAPLK	mir30d method 1
664.028	812.451	28	0		80	KEDLVFIFWAPESAPLK	mir30d method 1
664.028	998.531	28	0		80	KEDLVFIFWAPESAPLK	mir30d method 1
667.669	709.389	28	0		80	TPTDSPGVPPSANAHHLFR	mir30d method 1
667.669	780.426	28	0		80	TPTDSPGVPPSANAHHLFR	mir30d method 1
667.669	894.469	28	0		80	TPTDSPGVPPSANAHHLFR	mir30d method 1
667.669	1149.59	28	0		80	TPTDSPGVPPSANAHHLFR	mir30d method 1
667.669	1246.64	28	0		80	TPTDSPGVPPSANAHHLFR	mir30d method 1
667.669	1499.79	28	0		80	TPTDSPGVPPSANAHHLFR	mir30d method 1
674.338	585.335	28	0		80	SLLCDPNPDDPLVPEIAR	mir30d method 1
674.338	684.404	28	0		80	SLLCDPNPDDPLVPEIAR	mir30d method 1
674.338	797.488	28	0		80	SLLCDPNPDDPLVPEIAR	mir30d method 1
674.338	894.541	28	0		80	SLLCDPNPDDPLVPEIAR	mir30d method 1
674.338	1221.65	28	0		80	SLLCDPNPDDPLVPEIAR	mir30d method 1
674.338	1432.74	28	0		80	SLLCDPNPDDPLVPEIAR	mir30d method 1
680.374	789.438	26	0		80	ELASGLSFPVGFK[HeavyK]	mir30d method 1
680.376	959.544	26	0		80	ELASGLSFPVGFK[HeavyK]	mir30d method 1
682.366	774.487	23	0		80	EAEPYYLLLPR	mir30d method 1
682.366	937.551	23	0		80	EAEPYYLLLPR	mir30d method 1
682.366	1034.6	23	0		80	EAEPYYLLLPR	mir30d method 1
686.348	788.415	28	0		80	ANDQYLTAAALHNLDEAVK	mir30d method 1
686.348	925.474	28	0		80	ANDQYLTAAALHNLDEAVK	mir30d method 1
686.348	1038.56	28	0		80	ANDQYLTAAALHNLDEAVK	mir30d method 1
693.038	572.377	29	0		80	EDLVFIFWAPESAPLKSK	mir30d method 1
693.038	730.446	29	0		80	EDLVFIFWAPESAPLKSK	mir30d method 1
693.038	859.488	29	0		80	EDLVFIFWAPESAPLKSK	mir30d method 1
693.038	956.541	29	0		80	EDLVFIFWAPESAPLKSK	mir30d method 1
700.362	789.429	29	0		80	IYHPNINSNGSICLDILR	mir30d method 1
700.362	902.513	29	0		80	IYHPNINSNGSICLDILR	mir30d method 1
700.362	989.545	29	0		80	IYHPNINSNGSICLDILR	mir30d method 1
701.841	486.267	24	0		80	YPELYNHPDVR	mir30d method 1
701.841	737.369	24	0		80	YPELYNHPDVR	mir30d method 1
701.841	900.432	24	0		80	YPELYNHPDVR	mir30d method 1
701.841	1013.52	24	0		80	YPELYNHPDVR	mir30d method 1
701.841	1239.61	24	0		80	YPELYNHPDVR	mir30d method 1
702.359	776.394	24	0		80	HPFFVTIDWNK	mir30d method 1
702.359	875.462	24	0		80	HPFFVTIDWNK	mir30d method 1
702.359	1022.53	24	0		80	HPFFVTIDWNK	mir30d method 1
702.359	1266.65	24	0		80	HPFFVTIDWNK	mir30d method 1
714.346	619.345	24	0		80	IFGDNFDPDFIK	mir30d method 1
714.346	734.372	24	0		80	IFGDNFDPDFIK	mir30d method 1
714.346	881.44	24	0		80	IFGDNFDPDFIK	mir30d method 1
714.346	995.483	24	0		80	IFGDNFDPDFIK	mir30d method 1
722.285	792.301	25	0		80	HQSDPSEDEDER	mir30d method 1
722.285	879.333	25	0		80	HQSDPSEDEDER	mir30d method 1
722.285	976.385	25	0		80	HQSDPSEDEDER	mir30d method 1
725.363	371.24	25	0		80	GYDWTLVPMPVR	mir30d method 1
725.363	615.328	25	0		80	GYDWTLVPMPVR	mir30d method 1
725.363	827.481	25	0		80	GYDWTLVPMPVR	mir30d method 1
725.363	928.528	25	0		80	GYDWTLVPMPVR	mir30d method 1
725.363	1114.61	25	0		80	GYDWTLVPMPVR	mir30d method 1
727.357	774.399	25	0		80	HEWQVNGLDDIK	mir30d method 1
727.357	873.468	25	0		80	HEWQVNGLDDIK	mir30d method 1
727.357	1001.53	25	0		80	HEWQVNGLDDIK	mir30d method 1
728.032	858.41	30	0		80	TITGSETNLLFFWETHGTK	mir30d method 1
728.032	1005.48	30	0		80	TITGSETNLLFFWETHGTK	mir30d method 1
728.032	1152.55	30	0		80	TITGSETNLLFFWETHGTK	mir30d method 1
732.707	744.393	30	0		80	QILVGDIGDTVEDPYTSFVK	mir30d method 1
732.707	841.445	30	0		80	QILVGDIGDTVEDPYTSFVK	mir30d method 1
732.707	956.472	30	0		80	QILVGDIGDTVEDPYTSFVK	mir30d method 1
737.326	775.358	25	0		80	SSDPSPAGDNEIER	mir30d method 1
737.326	832.38	25	0		80	SSDPSPAGDNEIER	mir30d method 1
737.326	903.417	25	0		80	SSDPSPAGDNEIER	mir30d method 1
737.326	1000.47	25	0		80	SSDPSPAGDNEIER	mir30d method 1
737.326	1184.55	25	0		80	SSDPSPAGDNEIER	mir30d method 1
795.715	689.398	33	0		80	NGQAEAEEATEQTHISPNAIFK	mir30d method 1
795.715	889.514	33	0		80	NGQAEAEEATEQTHISPNAIFK	mir30d method 1
795.715	1026.57	33	0		80	NGQAEAEEATEQTHISPNAIFK	mir30d method 1
795.715	1127.62	33	0		80	NGQAEAEEATEQTHISPNAIFK	mir30d method 1
814.405	837.37	27	0		80	ILLDAQHESGQSSSR	mir30d method 1
814.405	974.429	27	0		80	ILLDAQHESGQSSSR	mir30d method 1
814.405	1102.49	27	0		80	ILLDAQHESGQSSSR	mir30d method 1
816.442	950.441	33	0		80	EVLLLVHNLPQQLFGYSWYK	mir30d method 1
816.442	1063.53	33	0		80	EVLLLVHNLPQQLFGYSWYK	mir30d method 1
816.442	1191.58	33	0		80	EVLLLVHNLPQQLFGYSWYK	mir30d method 1
816.442	1416.69	33	0		80	EVLLLVHNLPQQLFGYSWYK	mir30d method 1
828.882	832.38	28	0		80	RNSDPSPAGDNEIER	mir30d method 1
828.882	903.417	28	0		80	RNSDPSPAGDNEIER	mir30d method 1
828.882	1000.47	28	0		80	RNSDPSPAGDNEIER	mir30d method 1
828.882	1184.55	28	0		80	RNSDPSPAGDNEIER	mir30d method 1
844.866	918.441	28	0		80	DHSSQSEEEVVEGEK	mir30d method 1
844.866	1047.48	28	0		80	DHSSQSEEEVVEGEK	mir30d method 1
844.866	1134.52	28	0		80	DHSSQSEEEVVEGEK	mir30d method 1
862.921	874.463	29	0		80	HEWQVNGLDDIKDR	mir30d method 1
862.921	931.484	29	0		80	HEWQVNGLDDIKDR	mir30d method 1
862.921	1045.53	29	0		80	HEWQVNGLDDIKDR	mir30d method 1
874.908	974.414	29	0		80	AVSLSMGLYMGETETK	mir30d method 1
874.908	1087.5	29	0		80	AVSLSMGLYMGETETK	mir30d method 1
874.908	1144.52	29	0		80	AVSLSMGLYMGETETK	mir30d method 1
879.991	898.572	29	0		80	NSGVLFENQLLQIGVK	mir30d method 1
879.991	1012.62	29	0		80	NSGVLFENQLLQIGVK	mir30d method 1
879.991	1141.66	29	0		80	NSGVLFENQLLQIGVK	mir30d method 1
888.954	889.426	30	0		80	AVYIVIGDGVEEEQGAK	mir30d method 1
888.954	946.448	30	0		80	AVYIVIGDGVEEEQGAK	mir30d method 1
888.954	1061.47	30	0		80	AVYIVIGDGVEEEQGAK	mir30d method 1
902.8	585.335	37	0		80	VLLSICSLLCDPNPDDPLVPEIAR	mir30d method 1
902.8	894.541	37	0		80	VLLSICSLLCDPNPDDPLVPEIAR	mir30d method 1
902.8	1009.57	37	0		80	VLLSICSLLCDPNPDDPLVPEIAR	mir30d method 1
902.8	1124.6	37	0		80	VLLSICSLLCDPNPDDPLVPEIAR	mir30d method 1
902.8	1221.65	37	0		80	VLLSICSLLCDPNPDDPLVPEIAR	mir30d method 1
902.8	1432.74	37	0		80	VLLSICSLLCDPNPDDPLVPEIAR	mir30d method 1
926.994	998.494	31	0		80	ALQTILSQPVTYEAYR	mir30d method 1
926.994	1126.55	31	0		80	ALQTILSQPVTYEAYR	mir30d method 1
926.994	1213.59	31	0		80	ALQTILSQPVTYEAYR	mir30d method 1
927.493	930.541	31	0		80	FYAAEIASALGYLHSIK	mir30d method 1
927.493	1001.58	31	0		80	FYAAEIASALGYLHSIK	mir30d method 1
927.493	1088.61	31	0		80	FYAAEIASALGYLHSIK	mir30d method 1
927.88	944.378	31	0		80	DMGVYTLDMTDENYR	mir30d method 1
927.88	1059.4	31	0		80	DMGVYTLDMTDENYR	mir30d method 1
927.88	1172.49	31	0		80	DMGVYTLDMTDENYR	mir30d method 1
977.838	996.522	39	0		80	FTFIPEQSFDQLLQLQEITLHNNR	mir30d method 1
977.838	1124.58	39	0		80	FTFIPEQSFDQLLQLQEITLHNNR	mir30d method 1
977.838	1237.66	39	0		80	FTFIPEQSFDQLLQLQEITLHNNR	mir30d method 1
993.163	1022.53	40	0		80	FTFIPDQSFDQLFQLQEITLYNNR	mir30d method 1
993.163	1150.59	40	0		80	FTFIPDQSFDQLFQLQEITLYNNR	mir30d method 1
993.163	1263.67	40	0		80	FTFIPDQSFDQLFQLQEITLYNNR	mir30d method 1
1037.54	7 989.578	42	0		80	VLLSICSLLCDPNPDDPLVPEIARIYK	mir30d method 1
1037.54	7 1088.646	42	0		80	VLLSICSLLCDPNPDDPLVPEIARIYK	mir30d method 1
1037.54	7 1201.730	42	0		80	VLLSICSLLCDPNPDDPLVPEIARIYK	mir30d method 1
1037.54	7 1298.783	42	0		80	VLLSICSLLCDPNPDDPLVPEIARIYK	mir30d method 1
422.738	559.332	18	15		40	IGDYAGIK[HeavyK]	mir30d method 1
422.739	674.359	18	15		40	IGDYAGIK[HeavyK]	mir30d method 1
586.81	668.36	23	20		40	SAAGAFGPELSR[HeavyR]	mir30d method 1
586.811	815.428	23	20		40	SAAGAFGPELSR[HeavyR]	mir30d method 1
558.325	719.371	22	30		50	GLILVGGYGTR[HeavyR]	mir30d method 1
558.326	620.302	22	30		50	GLILVGGYGTR[HeavyR]	mir30d method 1
347.698	377.214	13	0.02	0	30	VAFTTR	mir30d method 2
347.698	524.283	13	0.02	0	30	VAFTTR	mir30d method 2
347.698	595.32	13	0.02	0	30	VAFTTR	mir30d method 2
486.243	517.273	18	0.02	0	30	IPDEINDR	mir30d method 2
486.243	646.315	18	0.02	0	30	IPDEINDR	mir30d method 2
486.243	761.342	18	0.02	0	30	IPDEINDR	mir30d method 2
486.243	858.395	18	0.02	0	30	IPDEINDR	mir30d method 2
833.942	857.484	28	0.02	0	30	HHLNNPPPSQVGLTR	mir30d method 2
833.942	954.537	28	0.02	0	30	HHLNNPPPSQVGLTR	mir30d method 2
833.942	1051.59	28	0.02	0	30	HHLNNPPPSQVGLTR	mir30d method 2
833.942	1165.63	28	0.02	0	30	HHLNNPPPSQVGLTR	mir30d method 2
730.951	797.488	25	0.02	0	35	KLITAHVEPLLAR	mir30d method 2
730.951	934.547	25	0.02	0	35	KLITAHVEPLLAR	mir30d method 2
730.951	1005.58	25	0.02	0	35	KLITAHVEPLLAR	mir30d method 2
730.951	1106.63	25	0.02	0	35	KLITAHVEPLLAR	mir30d method 2
613.315	854.445	24	0.02	0	40	GISNEGQNASIK[HeavyK]	mir30d method 2
613.316	725.403	24	0.02	0	40	GISNEGQNASIK[HeavyK]	mir30d method 2
867.417	961.52	29	0.02	0	40	ECDGTPIKEDTLIDK	mir30d method 2
867.417	1074.6	29	0.02	0	40	ECDGTPIKEDTLIDK	mir30d method 2
867.417	1171.66	29	0.02	0	40	ECDGTPIKEDTLIDK	mir30d method 2
867.417	1272.7	29	0.02	0	40	ECDGTPIKEDTLIDK	mir30d method 2
528.777	466.241	19	0.02	0	55	GTYGIVYAGR	mir30d method 2
528.777	565.309	19	0.02	0	55	GTYGIVYAGR	mir30d method 2
528.777	678.393	19	0.02	0	55	GTYGIVYAGR	mir30d method 2
528.777	735.415	19	0.02	0	55	GTYGIVYAGR	mir30d method 2
493.768	573.338	20	0.02	0	80	SSAAPPPPPR[HeavyR]	mir30d method 2
493.769	670.391	20	0.02	0	80	SSAAPPPPPR[HeavyR]	mir30d method 2
498.804	669.38	20	0.02	0	80	LTILEELR[HeavyR]	mir30d method 2
498.805	782.464	20	0.02	0	80	LTILEELR[HeavyR]	mir30d method 2
656.843	795.425	23	0.02	0	80	SYGIPFIETSAK	mir30d method 2
656.843	892.477	23	0.02	0	80	SYGIPFIETSAK	mir30d method 2
656.843	1005.56	23	0.02	0	80	SYGIPFIETSAK	mir30d method 2
656.843	1062.58	23	0.02	0	80	SYGIPFIETSAK	mir30d method 2
680.374	789.438	26	0.02	0	80	ELASGLSFPVGFK[HeavyK]	mir30d method 2
680.376	959.544	26	0.02	0	80	ELASGLSFPVGFK[HeavyK]	mir30d method 2
708.349	591.325	29	0.02	0	80	RDFAEMSSQLHLTPFTAR	mir30d method 2
708.349	805.457	29	0.02	0	80	RDFAEMSSQLHLTPFTAR	mir30d method 2
708.349	942.516	29	0.02	0	80	RDFAEMSSQLHLTPFTAR	mir30d method 2
708.349	1055.6	29	0.02	0	80	RDFAEMSSQLHLTPFTAR	mir30d method 2
708.349	1183.66	29	0.02	0	80	RDFAEMSSQLHLTPFTAR	mir30d method 2
727.357	804.447	30	0.02	0	80	DFAEMSSQLHLTPFTARGR	mir30d method 2
727.357	905.495	30	0.02	0	80	DFAEMSSQLHLTPFTARGR	mir30d method 2
727.357	1018.58	30	0.02	0	80	DFAEMSSQLHLTPFTARGR	mir30d method 2
727.357	1155.64	30	0.02	0	80	DFAEMSSQLHLTPFTARGR	mir30d method 2
730.951	569.377	25	0.02	0	80	KLITAHVEPLLAR	mir30d method 2
764.87	882.472	26	0.02	0	80	FDPDATQFIEFAK	mir30d method 2
764.87	983.52	26	0.02	0	80	FDPDATQFIEFAK	mir30d method 2
764.87	1054.56	26	0.02	0	80	FDPDATQFIEFAK	mir30d method 2
764.87	1169.58	26	0.02	0	80	FDPDATQFIEFAK	mir30d method 2
764.87	1266.64	26	0.02	0	80	FDPDATQFIEFAK	mir30d method 2
784.375	838.379	32	0.02	0	80	VGNTVPFGAGAAVGGGGGSSSSSEDVK	mir30d method 2
784.375	925.411	32	0.02	0	80	VGNTVPFGAGAAVGGGGGSSSSSEDVK	mir30d method 2
784.375	982.432	32	0.02	0	80	VGNTVPFGAGAAVGGGGGSSSSSEDVK	mir30d method 2
784.375	1039.45	32	0.02	0	80	VGNTVPFGAGAAVGGGGGSSSSSEDVK	mir30d method 2
836.409	907.448	34	0.02	0	80	VGNTVPFGAGAAVGGGGGSSSSSEDVKR	mir30d method 2
836.409	994.48	34	0.02	0	80	VGNTVPFGAGAAVGGGGGSSSSSEDVKR	mir30d method 2
836.409	1081.51	34	0.02	0	80	VGNTVPFGAGAAVGGGGGSSSSSEDVKR	mir30d method 2
836.409	1138.53	34	0.02	0	80	VGNTVPFGAGAAVGGGGGSSSSSEDVKR	mir30d method 2
844.895	904.448	28	0.02	0	80	QQEEAQAAAAAASAESR	mir30d method 2
844.895	975.485	28	0.02	0	80	QQEEAQAAAAAASAESR	mir30d method 2
844.895	1103.54	28	0.02	0	80	QQEEAQAAAAAASAESR	mir30d method 2
844.895	1174.58	28	0.02	0	80	QQEEAQAAAAAASAESR	mir30d method 2
851.923	961.52	29	0.02	0	80	EDEGTPIKEDIITDK	mir30d method 2
851.923	1074.6	29	0.02	0	80	EDEGTPIKEDIITDK	mir30d method 2
851.923	1171.66	29	0.02	0	80	EDEGTPIKEDIITDK	mir30d method 2
851.923	1272.7	29	0.02	0	80	EDEGTPIKEDIITDK	mir30d method 2
873.445	345.213	36	0.02	0	80	VSEPVEIGIQVTPDEDDHLLSPTK	mir30d method 2
873.445	910.499	36	0.02	0	80	VSEPVEIGIQVTPDEDDHLLSPTK	mir30d method 2
873.445	1025.53	36	0.02	0	80	VSEPVEIGIQVTPDEDDHLLSPTK	mir30d method 2
873.445	1154.57	36	0.02	0	80	VSEPVEIGIQVTPDEDDHLLSPTK	mir30d method 2
873.445	1269.6	36	0.02	0	80	VSEPVEIGIQVTPDEDDHLLSPTK	mir30d method 2
774.86	876.406	26	0.02	13	33	SVTEQGAELSNEER	mir30d method 2
774.86	947.443	26	0.02	13	33	SVTEQGAELSNEER	mir30d method 2
774.86	1004.46	26	0.02	13	33	SVTEQGAELSNEER	mir30d method 2
422.738	559.332	18	0.02	15	40	IGDYAGIK[HeavyK]	mir30d method 2
422.739	674.359	18	0.02	15	40	IGDYAGIK[HeavyK]	mir30d method 2
854.908	915.52	29	0.02	15	44	EEDPHEGKIWFHGK	mir30d method 2
854.908	972.541	29	0.02	15	44	EEDPHEGKIWFHGK	mir30d method 2
854.908	1101.58	29	0.02	15	44	EEDPHEGKIWFHGK	mir30d method 2
854.908	1238.64	29	0.02	15	44	EEDPHEGKIWFHGK	mir30d method 2
586.81	668.36	23	0.02	20	40	SAAGAFGPELSR[HeavyR]	mir30d method 2
586.811	815.428	23	0.02	20	40	SAAGAFGPELSR[HeavyR]	mir30d method 2
583.29	407.229	20	0.02	20	50	SQLDISDPYK	mir30d method 2
583.29	609.288	20	0.02	20	50	SQLDISDPYK	mir30d method 2
583.29	722.372	20	0.02	20	50	SQLDISDPYK	mir30d method 2
583.29	837.399	20	0.02	20	50	SQLDISDPYK	mir30d method 2
583.29	950.483	20	0.02	20	50	SQLDISDPYK	mir30d method 2
609.33	632.398	21	0.02	24	44	SQWSPALTISK	mir30d method 2
609.33	729.451	21	0.02	24	44	SQWSPALTISK	mir30d method 2
609.33	816.483	21	0.02	24	44	SQWSPALTISK	mir30d method 2
609.33	1002.56	21	0.02	24	44	SQWSPALTISK	mir30d method 2
711.907	385.256	24	0.02	24	44	SVSAPQQIINPIR	mir30d method 2
711.907	725.467	24	0.02	24	44	SVSAPQQIINPIR	mir30d method 2
711.907	853.525	24	0.02	24	44	SVSAPQQIINPIR	mir30d method 2
711.907	981.584	24	0.02	24	44	SVSAPQQIINPIR	mir30d method 2
711.907	1078.64	24	0.02	24	44	SVSAPQQIINPIR	mir30d method 2
746.366	373.208	31	0.02	24	54	TDVTPSTTSPPSYDSVTKPEK	mir30d method 2
746.366	788.451	31	0.02	24	54	TDVTPSTTSPPSYDSVTKPEK	mir30d method 2
746.366	903.478	31	0.02	24	54	TDVTPSTTSPPSYDSVTKPEK	mir30d method 2
746.366	1066.54	31	0.02	24	54	TDVTPSTTSPPSYDSVTKPEK	mir30d method 2
746.366	1153.57	31	0.02	24	54	TDVTPSTTSPPSYDSVTKPEK	mir30d method 2
746.366	1250.63	31	0.02	24	54	TDVTPSTTSPPSYDSVTKPEK	mir30d method 2
598.296	561.324	21	0.02	25	45	DIQDYDSIVK	mir30d method 2
598.296	724.388	21	0.02	25	45	DIQDYDSIVK	mir30d method 2
598.296	839.415	21	0.02	25	45	DIQDYDSIVK	mir30d method 2
598.296	967.473	21	0.02	25	45	DIQDYDSIVK	mir30d method 2
711.335	742.325	29	0.02	25	80	TAFDEAIAELDTLSEESYK	mir30d method 2
711.335	855.409	29	0.02	25	80	TAFDEAIAELDTLSEESYK	mir30d method 2
711.335	956.457	29	0.02	25	80	TAFDEAIAELDTLSEESYK	mir30d method 2
911.993	954.537	30	0.02	26	46	RHHLNNPPPSQVGLTR	mir30d method 2
911.993	1013.59	30	0.02	26	46	HHLNNPPPSQVGLTRR	mir30d method 2
911.993	1110.64	30	0.02	26	46	HHLNNPPPSQVGLTRR	mir30d method 2
911.993	1207.69	30	0.02	26	46	HHLNNPPPSQVGLTRR	mir30d method 2
911.993	1279.67	30	0.02	26	46	RHHLNNPPPSQVGLTR	mir30d method 2
602.281	612.3	21	0.02	28	48	SFEDIHHYR	mir30d method 2
602.281	725.384	21	0.02	28	48	SFEDIHHYR	mir30d method 2
602.281	840.411	21	0.02	28	48	SFEDIHHYR	mir30d method 2
602.281	969.454	21	0.02	28	48	SFEDIHHYR	mir30d method 2
558.325	719.371	22	0.02	30	50	GLILVGGYGTR[HeavyR]	mir30d method 2
558.326	620.302	22	0.02	30	50	GLILVGGYGTR[HeavyR]	mir30d method 2
785.369	883.416	32	0.02	30	50	LIQNHFVDEYDPTIEDSYR	mir30d method 2
785.369	980.468	32	0.02	30	50	LIQNHFVDEYDPTIEDSYR	mir30d method 2
785.369	1095.49	32	0.02	30	50	LIQNHFVDEYDPTIEDSYR	mir30d method 2
785.369	1258.56	32	0.02	30	50	LIQNHFVDEYDPTIEDSYR	mir30d method 2
578.852	587.34	20	0.02	30	55	FPVLILEPTK	mir30d method 2
578.852	700.424	20	0.02	30	55	FPVLILEPTK	mir30d method 2
578.852	813.508	20	0.02	30	55	FPVLILEPTK	mir30d method 2
578.852	912.576	20	0.02	30	55	FPVLILEPTK	mir30d method 2
785.417	792.421	27	0.02	30	55	SYGIPFIETSAKTR	mir30d method 2
785.417	905.505	27	0.02	30	55	SYGIPFIETSAKTR	mir30d method 2
785.417	1052.57	27	0.02	30	55	SYGIPFIETSAKTR	mir30d method 2
785.417	1149.63	27	0.02	30	55	SYGIPFIETSAKTR	mir30d method 2
666.904	569.377	23	0.02	30	56	LITAHVEPLLAR	mir30d method 2
666.904	698.42	23	0.02	30	56	LITAHVEPLLAR	mir30d method 2
666.904	797.488	23	0.02	30	56	LITAHVEPLLAR	mir30d method 2
666.904	934.547	23	0.02	30	56	LITAHVEPLLAR	mir30d method 2
666.904	1005.58	23	0.02	30	56	LITAHVEPLLAR	mir30d method 2
605.827	693.357	21	0.02	30	80	FATVVEELFR	mir30d method 2
605.827	792.425	21	0.02	30	80	FATVVEELFR	mir30d method 2
605.827	891.493	21	0.02	30	80	FATVVEELFR	mir30d method 2
605.827	992.541	21	0.02	30	80	FATVVEELFR	mir30d method 2
784.962	862.54	27	0.02	30	80	LIHQTNLILQTFK	mir30d method 2
784.962	976.583	27	0.02	30	80	LIHQTNLILQTFK	mir30d method 2
784.962	1077.63	27	0.02	30	80	LIHQTNLILQTFK	mir30d method 2
784.962	1205.69	27	0.02	30	80	LIHQTNLILQTFK	mir30d method 2
569.78	609.299	20	0.02	31	51	DPFLGFTDAR	mir30d method 2
569.78	666.321	20	0.02	31	51	DPFLGFTDAR	mir30d method 2
569.78	779.405	20	0.02	31	51	DPFLGFTDAR	mir30d method 2
569.78	926.473	20	0.02	31	51	DPFLGFTDAR	mir30d method 2
569.78	1023.53	20	0.02	31	51	DPFLGFTDAR	mir30d method 2
983.97	591.325	32	0.02	32	52	DFAEMSSQLHLTPFTAR	mir30d method 2
983.97	1055.6	32	0.02	32	52	DFAEMSSQLHLTPFTAR	mir30d method 2
983.97	1183.66	32	0.02	32	52	DFAEMSSQLHLTPFTAR	mir30d method 2
983.97	1270.69	32	0.02	32	52	DFAEMSSQLHLTPFTAR	mir30d method 2
983.97	1357.72	32	0.02	32	52	DFAEMSSQLHLTPFTAR	mir30d method 2
879.915	911.399	29	0.02	34	54	TVSIFNWDEYIEDK	mir30d method 2
879.915	1097.48	29	0.02	34	54	TVSIFNWDEYIEDK	mir30d method 2
879.915	1211.52	29	0.02	34	54	TVSIFNWDEYIEDK	mir30d method 2
879.915	1358.59	29	0.02	34	54	TVSIFNWDEYIEDK	mir30d method 2
646.348	720.404	22	0.02	35	55	ELLDTVNNVFK	mir30d method 2
646.348	821.452	22	0.02	35	55	ELLDTVNNVFK	mir30d method 2
646.348	936.479	22	0.02	35	55	ELLDTVNNVFK	mir30d method 2
646.348	1049.56	22	0.02	35	55	ELLDTVNNVFK	mir30d method 2
745.404	763.435	25	0.02	35	55	SVQNLANLVEFGAK	mir30d method 2
745.404	877.478	25	0.02	35	55	SVQNLANLVEFGAK	mir30d method 2
745.404	948.515	25	0.02	35	55	SVQNLANLVEFGAK	mir30d method 2
745.404	1061.6	25	0.02	35	55	SVQNLANLVEFGAK	mir30d method 2
776.373	795.4	32	0.02	35	80	EMSPLVDNIALWMTEYLNR	mir30d method 2
776.373	942.435	32	0.02	35	80	EMSPLVDNIALWMTEYLNR	mir30d method 2
776.373	1128.51	32	0.02	35	80	EMSPLVDNIALWMTEYLNR	mir30d method 2
776.373	1241.6	32	0.02	35	80	EMSPLVDNIALWMTEYLNR	mir30d method 2
635.392	758.441	22	0.02	38	58	LLAITELLQQK	mir30d method 2
635.392	859.488	22	0.02	38	58	LLAITELLQQK	mir30d method 2
635.392	972.572	22	0.02	38	58	LLAITELLQQK	mir30d method 2
635.392	1043.61	22	0.02	38	58	LLAITELLQQK	mir30d method 2
851.441	944.535	28	0.02	40	80	GGAFAPGAEPFPALFPR	mir30d method 2
851.441	1073.58	28	0.02	40	80	GGAFAPGAEPFPALFPR	mir30d method 2
851.441	1144.62	28	0.02	40	80	GGAFAPGAEPFPALFPR	mir30d method 2
851.441	1298.69	28	0.02	40	80	GGAFAPGAEPFPALFPR	mir30d method 2
852.431	930.52	29	0.02	40	80	GGGFAPGTEPFPGLFPR	mir30d method 2
852.431	1059.56	29	0.02	40	80	GGGFAPGTEPFPGLFPR	mir30d method 2
852.431	1160.61	29	0.02	40	80	GGGFAPGTEPFPGLFPR	mir30d method 2
852.431	1217.63	29	0.02	40	80	GGGFAPGTEPFPGLFPR	mir30d method 2
852.431	1314.68	29	0.02	40	80	GGGFAPGTEPFPGLFPR	mir30d method 2
908.943	975.485	30	0.02	40	80	KQQEEAQAAAAAASAESR	mir30d method 2
908.943	1103.54	30	0.02	40	80	KQQEEAQAAAAAASAESR	mir30d method 2
908.943	1174.58	30	0.02	40	80	KQQEEAQAAAAAASAESR	mir30d method 2
908.943	1303.62	30	0.02	40	80	KQQEEAQAAAAAASAESR	mir30d method 2
989.817	980.468	40	0.02	40	80	SALTIQLIQNHFVDEYDPTIEDSYR	mir30d method 2
989.817	1095.49	40	0.02	40	80	SALTIQLIQNHFVDEYDPTIEDSYR	mir30d method 2
989.817	1258.56	40	0.02	40	80	SALTIQLIQNHFVDEYDPTIEDSYR	mir30d method 2
989.817	1387.6	40	0.02	40	80	SALTIQLIQNHFVDEYDPTIEDSYR	mir30d method 2
1023.8	1 1166.584	41	0.02	40	80	NEAETTSMVSMPLYAVMYPVFNELER	mir30d method 2
1023.8	1 1313.619	41	0.02	40	80	NEAETTSMVSMPLYAVMYPVFNELER	mir30d method 2
1023.8	1 1412.688	41	0.02	40	80	NEAETTSMVSMPLYAVMYPVFNELER	mir30d method 2
1023.8	1 1483.725	41	0.02	40	80	NEAETTSMVSMPLYAVMYPVFNELER	mir30d method 2
619.288	645.357	22	0.02	45	80	SNDFEELVER	mir30d method 2
619.288	774.399	22	0.02	45	80	SNDFEELVER	mir30d method 2
619.288	921.468	22	0.02	45	80	SNDFEELVER	mir30d method 2
619.288	1036.49	22	0.02	45	80	SNDFEELVER	mir30d method 2
681.001	694.377	28	0.02	45	80	GIVDQSQQAYQEAFEISK	mir30d method 2
681.001	823.42	28	0.02	45	80	GIVDQSQQAYQEAFEISK	mir30d method 2
681.001	951.478	28	0.02	45	80	GIVDQSQQAYQEAFEISK	mir30d method 2
396.198	417.246	15	0.015	0	20	GETSIER	mir 34a
396.198	504.278	15	0.015	0	20	GETSIER	mir 34a
396.198	605.325	15	0.015	0	20	GETSIER	mir 34a
396.198	734.368	15	0.015	0	20	GETSIER	mir 34a
457.77	517.299	17	0.015	0	20	GLVQRWR	mir 34a
457.77	645.358	17	0.015	0	20	GLVQRWR	mir 34a
457.77	744.426	17	0.015	0	20	GLVQRWR	mir 34a
449.274	558.361	16	0.015	0	25	IPEQILGK	mir 34a
449.274	687.404	16	0.015	0	25	IPEQILGK	mir 34a
449.274	784.456	16	0.015	0	25	IPEQILGK	mir 34a
765.394	788.39	26	0.015	0	28	KLEELELDEQQR	mir 34a
765.394	803.401	26	0.015	0	28	LEELELDEQQRK	mir 34a
765.394	916.485	26	0.015	0	28	LEELELDEQQRK	mir 34a
765.394	917.432	26	0.015	0	28	KLEELELDEQQR	mir 34a
765.394	1030.52	26	0.015	0	28	KLEELELDEQQR	mir 34a
765.394	1045.53	26	0.015	0	28	LEELELDEQQRK	mir 34a
765.394	1158.61	26	0.015	0	28	LEELELDEQQRK	mir 34a
765.394	1159.56	26	0.015	0	28	KLEELELDEQQR	mir 34a
493.768	573.338	20	0.02	0	40	SSAAPPPPPR[HeavyR]	mir 34a
493.769	670.391	20	0.02	0	40	SSAAPPPPPR[HeavyR]	mir 34a
613.315	854.445	24	0.02	0	40	GISNEGQNASIK[HeavyK]	mir 34a
613.316	725.403	24	0.02	0	40	GISNEGQNASIK[HeavyK]	mir 34a
289.138	346.183	12	0.015	0	80	SSGGGGR	mir 34a
289.138	403.205	12	0.015	0	80	SSGGGGR	mir 34a
289.138	490.237	12	0.015	0	80	SSGGGGR	mir 34a
367.189	403.205	14	0.015	0	80	RSSGGGGR	mir 34a
367.189	490.237	14	0.015	0	80	RSSGGGGR	mir 34a
367.189	577.269	14	0.015	0	80	RSSGGGGR	mir 34a
466.235	329.193	17	0.015	0	80	GDLPYGPGR	mir 34a
466.235	549.278	17	0.015	0	80	GDLPYGPGR	mir 34a
466.235	646.331	17	0.015	0	80	GDLPYGPGR	mir 34a
466.235	759.415	17	0.015	0	80	GDLPYGPGR	mir 34a
466.235	874.442	17	0.015	0	80	GDLPYGPGR	mir 34a
470.261	552.303	17	0.015	0	80	TSAKYLEK	mir 34a
470.261	680.398	17	0.015	0	80	TSAKYLEK	mir 34a
470.261	751.435	17	0.015	0	80	TSAKYLEK	mir 34a
470.261	838.467	17	0.015	0	80	TSAKYLEK	mir 34a
544.286	485.294	19	0.015	0	80	GDLPYGPGRR	mir 34a
544.286	705.379	19	0.015	0	80	GDLPYGPGRR	mir 34a
544.286	802.432	19	0.015	0	80	GDLPYGPGRR	mir 34a
544.286	915.516	19	0.015	0	80	GDLPYGPGRR	mir 34a
544.286	1030.54	19	0.015	0	80	GDLPYGPGRR	mir 34a
556.291	604.33	20	0.015	0	80	QIEHTLNEK	mir 34a
556.291	741.389	20	0.015	0	80	QIEHTLNEK	mir 34a
556.291	870.432	20	0.015	0	80	QIEHTLNEK	mir 34a
569.78	609.299	20	0.015	0	80	DPFLGFTDAR	mir 34a
569.78	666.321	20	0.015	0	80	DPFLGFTDAR	mir 34a
569.78	779.405	20	0.015	0	80	DPFLGFTDAR	mir 34a
569.78	926.473	20	0.015	0	80	DPFLGFTDAR	mir 34a
569.78	1023.53	20	0.015	0	80	DPFLGFTDAR	mir 34a
572.773	587.29	20	0.015	0	80	TPFPDSSTHR	mir 34a
572.773	702.317	20	0.015	0	80	TPFPDSSTHR	mir 34a
572.773	799.369	20	0.015	0	80	TPFPDSSTHR	mir 34a
572.773	946.438	20	0.015	0	80	TPFPDSSTHR	mir 34a
572.773	1043.49	20	0.015	0	80	TPFPDSSTHR	mir 34a
580.837	615.382	20	0.015	0	80	DLIGFGLQVAK	mir 34a
580.837	762.451	20	0.015	0	80	DLIGFGLQVAK	mir 34a
580.837	819.472	20	0.015	0	80	DLIGFGLQVAK	mir 34a
580.837	932.556	20	0.015	0	80	DLIGFGLQVAK	mir 34a
604.812	631.341	21	0.015	0	80	FSLETEVDLR	mir 34a
604.812	732.389	21	0.015	0	80	FSLETEVDLR	mir 34a
604.812	861.431	21	0.015	0	80	FSLETEVDLR	mir 34a
604.812	974.515	21	0.015	0	80	FSLETEVDLR	mir 34a
604.859	640.353	21	0.015	0	80	ALGTLLHTNLR	mir 34a
604.859	753.437	21	0.015	0	80	ALGTLLHTNLR	mir 34a
604.859	866.521	21	0.015	0	80	ALGTLLHTNLR	mir 34a
604.859	967.568	21	0.015	0	80	ALGTLLHTNLR	mir 34a
605.827	693.357	21	0.015	0	80	FATVVEELFR	mir 34a
605.827	792.425	21	0.015	0	80	FATVVEELFR	mir 34a
605.827	891.493	21	0.015	0	80	FATVVEELFR	mir 34a
605.827	992.541	21	0.015	0	80	FATVVEELFR	mir 34a
634.341	659.383	22	0.015	0	80	QIEHTLNEKR	mir 34a
634.341	760.431	22	0.015	0	80	QIEHTLNEKR	mir 34a
634.341	897.49	22	0.015	0	80	QIEHTLNEKR	mir 34a
658.38	599.388	23	0.015	0	80	HIFVYGPLTIR	mir 34a
658.38	819.472	23	0.015	0	80	HIFVYGPLTIR	mir 34a
658.38	918.541	23	0.015	0	80	HIFVYGPLTIR	mir 34a
658.38	1065.61	23	0.015	0	80	HIFVYGPLTIR	mir 34a
658.38	1178.69	23	0.015	0	80	HIFVYGPLTIR	mir 34a
676.88	741.389	23	0.015	0	80	LKQIEHTLNEK	mir 34a
676.88	870.432	23	0.015	0	80	LKQIEHTLNEK	mir 34a
676.88	983.516	23	0.015	0	80	LKQIEHTLNEK	mir 34a
688.868	704.369	24	0.015	0	80	VFQQVAQASKDR	mir 34a
688.868	775.406	24	0.015	0	80	VFQQVAQASKDR	mir 34a
688.868	874.474	24	0.015	0	80	VFQQVAQASKDR	mir 34a
688.868	1002.53	24	0.015	0	80	VFQQVAQASKDR	mir 34a
688.868	1130.59	24	0.015	0	80	VFQQVAQASKDR	mir 34a
708.349	591.325	29	0.015	0	80	RDFAEMSSQLHLTPFTAR	mir 34a
708.349	805.457	29	0.015	0	80	RDFAEMSSQLHLTPFTAR	mir 34a
708.349	942.516	29	0.015	0	80	RDFAEMSSQLHLTPFTAR	mir 34a
708.349	1055.6	29	0.015	0	80	RDFAEMSSQLHLTPFTAR	mir 34a
708.349	1183.66	29	0.015	0	80	RDFAEMSSQLHLTPFTAR	mir 34a
708.922	631.393	24	0.015	0	80	ILQAVNFPFLVR	mir 34a
708.922	778.461	24	0.015	0	80	ILQAVNFPFLVR	mir 34a
708.922	892.504	24	0.015	0	80	ILQAVNFPFLVR	mir 34a
708.922	991.572	24	0.015	0	80	ILQAVNFPFLVR	mir 34a
714.841	754.373	24	0.015	0	80	TGQAPGYSYTAANK	mir 34a
714.841	917.436	24	0.015	0	80	TGQAPGYSYTAANK	mir 34a
714.841	974.458	24	0.015	0	80	TGQAPGYSYTAANK	mir 34a
714.841	1071.51	24	0.015	0	80	TGQAPGYSYTAANK	mir 34a
717.392	799.457	24	0.015	0	80	HKTGPNLHGLFGR	mir 34a
717.392	913.5	24	0.015	0	80	HKTGPNLHGLFGR	mir 34a
717.392	1010.55	24	0.015	0	80	HKTGPNLHGLFGR	mir 34a
717.392	1067.57	24	0.015	0	80	HKTGPNLHGLFGR	mir 34a
729.857	847.416	25	0.015	0	80	SLPGEQEQEVAGSK	mir 34a
729.857	975.474	25	0.015	0	80	SLPGEQEQEVAGSK	mir 34a
729.857	1104.52	25	0.015	0	80	SLPGEQEQEVAGSK	mir 34a
729.857	1161.54	25	0.015	0	80	SLPGEQEQEVAGSK	mir 34a
729.857	1258.59	25	0.015	0	80	SLPGEQEQEVAGSK	mir 34a
736.43	755.489	25	0.015	0	80	HIFVYGPLTIRR	mir 34a
736.43	812.51	25	0.015	0	80	HIFVYGPLTIRR	mir 34a
736.43	975.573	25	0.015	0	80	HIFVYGPLTIRR	mir 34a
736.43	1074.64	25	0.015	0	80	HIFVYGPLTIRR	mir 34a
740.751	783.451	30	0.015	0	80	EVPLSALTNILSAQLISHWK	mir 34a
740.751	911.51	30	0.015	0	80	EVPLSALTNILSAQLISHWK	mir 34a
740.751	982.547	30	0.015	0	80	EVPLSALTNILSAQLISHWK	mir 34a
740.751	1069.58	30	0.015	0	80	EVPLSALTNILSAQLISHWK	mir 34a
740.751	1182.66	30	0.015	0	80	EVPLSALTNILSAQLISHWK	mir 34a
740.751	1295.75	30	0.015	0	80	EVPLSALTNILSAQLISHWK	mir 34a
740.751	1409.79	30	0.015	0	80	EVPLSALTNILSAQLISHWK	mir 34a
747.365	765.389	25	0.015	0	80	AQDTELAAYLENR	mir 34a
747.365	836.426	25	0.015	0	80	AQDTELAAYLENR	mir 34a
747.365	949.51	25	0.015	0	80	AQDTELAAYLENR	mir 34a
747.365	1078.55	25	0.015	0	80	AQDTELAAYLENR	mir 34a
761.372	775.41	26	0.015	0	80	VSYYFSYQHVTK	mir 34a
761.372	862.442	26	0.015	0	80	VSYYFSYQHVTK	mir 34a
761.372	1009.51	26	0.015	0	80	VSYYFSYQHVTK	mir 34a
761.372	1172.57	26	0.015	0	80	VSYYFSYQHVTK	mir 34a
778.889	917.436	26	0.015	0	80	KTGQAPGYSYTAANK	mir 34a
778.889	974.458	26	0.015	0	80	KTGQAPGYSYTAANK	mir 34a
778.889	1071.51	26	0.015	0	80	KTGQAPGYSYTAANK	mir 34a
778.889	1142.55	26	0.015	0	80	KTGQAPGYSYTAANK	mir 34a
786.972	631.393	27	0.015	0	80	RILQAVNFPFLVR	mir 34a
786.972	892.504	27	0.015	0	80	RILQAVNFPFLVR	mir 34a
786.972	991.572	27	0.015	0	80	RILQAVNFPFLVR	mir 34a
786.972	1062.61	27	0.015	0	80	RILQAVNFPFLVR	mir 34a
796.477	846.508	27	0.015	0	80	EPLPPIVTFQLIPK	mir 34a
796.477	945.577	27	0.015	0	80	EPLPPIVTFQLIPK	mir 34a
796.477	1058.66	27	0.015	0	80	EPLPPIVTFQLIPK	mir 34a
796.477	1155.71	27	0.015	0	80	EPLPPIVTFQLIPK	mir 34a
796.477	1252.77	27	0.015	0	80	EPLPPIVTFQLIPK	mir 34a
796.477	1462.9	27	0.015	0	80	EPLPPIVTFQLIPK	mir 34a
812.386	430.266	27	0.015	0	80	TLNWGGGYTDEPVSK	mir 34a
812.386	938.447	27	0.015	0	80	TLNWGGGYTDEPVSK	mir 34a
812.386	995.468	27	0.015	0	80	TLNWGGGYTDEPVSK	mir 34a
[truncated: 1,766 more rows]
